# Supplementary material for: Integrated Analysis of the ceRNA Network and M-7474 Function in Testosterone-Mediated Fat Deposition in Pigs
Source: MDPI journal article supplement (doi:10.3390/genes13040668), 2022-04-10
Supplement: s1 [file s1]

**Table S3.** Statistical summary for RNA sequencing results

| Sample | Clean Reads(M) | Clean Bases(G) | Q20(%) | Q30(%) | GC(%) | Total Mapped     | Read Length(bp) |
|--------|----------------|----------------|--------|--------|-------|------------------|-----------------|
| A1_F   | 96.1643M       | 14.4247G       | 93.95  | 86.79  | 56.21 | 74690144(77.71%) | 150             |
| A1_LF  | 97.4015M       | 14.6102G       | 97.28  | 93.32  | 54.37 | 83827810(86.16%) | 150             |
| A4_F   | 96.4951M       | 14.4743G       | 94.47  | 87.78  | 55.79 | 76975996(79.84%) | 150             |
| A4_LF  | 96.2308M       | 14.4346G       | 97.09  | 92.99  | 53.95 | 81851802(85.26%) | 150             |
| A7_F   | 97.5291M       | 14.6294G       | 97.09  | 93.05  | 51.37 | 83717986(85.90%) | 150             |
| A7_LF  | 97.4236M       | 14.6135G       | 96.87  | 93.01  | 51.91 | 82263422(84.65%) | 150             |
| B1_F   | 97.0317M       | 14.5548G       | 94     | 86.99  | 55.36 | 74450694(76.78%) | 150             |
| B1_LF  | 97.3676M       | 14.6051G       | 96.97  | 92.68  | 56.9  | 82909806(85.32%) | 150             |
| B4_F   | 97.1519M       | 14.5728G       | 96.87  | 92.87  | 54.16 | 84613052(87.18%) | 150             |
| B4_LF  | 97.1956M       | 14.5793G       | 96.92  | 92.98  | 54.87 | 84139274(86.78%) | 150             |
| B7_F   | 96.0861M       | 14.4129G       | 96.99  | 92.91  | 50.58 | 81369440(84.72%) | 150             |
| B7_LF  | 97.0402M       | 14.5560G       | 96.84  | 92.97  | 52.98 | 80961378(83.59%) | 150             |
