# Supplementary material for: Integrated Analysis of the ceRNA Network and M-7474 Function in Testosterone-Mediated Fat Deposition in Pigs
Source: MDPI journal article supplement (doi:10.3390/genes13040668), 2022-04-10
Supplement: s1 [file s1]

**Table S2 Primer sequences used in qRT-PCR analysis**

| Gene name   | Primer                      | Amplicon Length(bp) |
|-------------|-----------------------------|---------------------|
| MSTRG.12779 | F:5'GCTGTAGCTCACGGACAGAG3'  | 255                 |
|             | R:5'TGTTCTCCACATGGACCGAC3'  |                     |
| MSTRG.14129 | F:5'ATCGAGTCCCAATCACCCAC3'  | 197                 |
|             | R:5'CTGGTGATTTGCAGCCCTTG3'  |                     |
| MSTRG.20066 | F:5'CCCTGAATGCCCCCTTACTGG3' | 157                 |
|             | R:5'ACCTGACCCTGGCCTAATGT3'  |                     |
| MSTRG.12775 | F:5'GGCCAATTGAGGACCCAAGA3'  | 263                 |
|             | R:5'AGTTGTCCCTCTCACCACCT3'  |                     |
| MSTRG.19818 | F:5'ACAACTAGCCACCTGTTCGG3'  | 255                 |
|             | R:5'GGCCTTAAAGGGGTCCTGTC3'  |                     |
| MSTRG.11513 | F:5'AGCATTCTGTGATGCAGCCT3'  | 134                 |
|             | R:5'GCACCAAATACTCACCACGC3'  |                     |
| MSTRG.7474  | F:5'GCATCATGTGGGGTTGCTTG3'  | 207                 |
|             | R:5'TCTAAAAGCGAGGCCGAGTC3'  |                     |
| MSTRG.9938  | F:5'TGTCCAGGTTGTATGGCTCA3'  | 147                 |
|             | R:5'CAGGCTGGAGTCAGGGAAAT3'  |                     |
| NINL        | F:5'CTGTCCCGCCAAAGTATGT3'   | 262                 |
|             | TTCCCGAAGACCTCACTCC         |                     |
| CLDN11      | CCATTCTCCTGCTGCTGACA        | 197                 |
|             | TGCATACAGGGAGTAGCCAAAG      |                     |
| DUOX1B      | TTGGGACTCTGTGCTGCTTC        | 113                 |
|             | CATGATACTCTGGCGGTTCTG       |                     |
| P2RX6       | CTCGCCAAGAAAGGCTACCAG       | 133                 |

|                |                                |     |
|----------------|--------------------------------|-----|
|                | GCTTCACGAAATCAGCCACATC         |     |
| PIK3C2G        | F: 5' GCAATGAGCTTCTGAGCTTGC 3' |     |
|                | R: 5' CGGAGATTGCTGTCCTGTGT 3'  | 127 |
| SGK1           | F:5'GAACACAACGGCACGACATCC3'    |     |
|                | R:5'TGGAGGCAGACCATAACAGCATC3'  | 144 |
| FAT3           | F:5'TCCTGAAGATTGTGGACGGC3'     |     |
|                | R:5'AGGGCTCCGAAGTAGATGGT3'     | 232 |
| PPAR $\gamma$  | F:5'CTTATTGACCCAGAAAGCGATG3'   |     |
|                | R:5'GTCTTCATAGTGTGGAGTGGAA3'   | 213 |
| GFPT2          | F: CAGGGTCGCCCCGATTAT          |     |
|                | R: CACGCTCTTGTTCTCATTCC        | 223 |
| SPP1           | F: ACAGCCGCATCAGCATTG          |     |
|                | R: AAGTCGTCCGTTTCCTCC          | 311 |
| HSD11B1        | F:5'TGGCGAATCCACTTGTT3'        |     |
|                | R:5'GGTTGTACGTTGAGTATCCC3'     | 181 |
| OLR1           | F:5'GCGGCAAACCTTTTCAGGTCC3'    |     |
|                | R:5'ACTGGAATGGGCGATGGTTT3'     | 189 |
| $\beta$ -actin | F:5'AGAGCAAGAGAGGCATCCTG3'     |     |
|                | R:5'CACGCAGCTCGTTGTAGAAG3'     | 111 |
| novel_mir_618  | F:5'GTGAAATGTTTAGGACCACT3'     |     |
| novel_mir_359  | F:5'TGTGGTGCCTGACGTCTTGG3'     |     |
| novel_mir_528  | F:5'AGGACGGGAAGAGAGGAGGGCGT3'  |     |
| novel_mir_308  | F:5'CGGCTCTGGGTCTGTGGGGAG3'    |     |
| novel_mir_300  | F:5'TGCGTGGCTTCTCTGTGCAGTC3'   |     |
| novel_mir_82   | F:5'AAATCTCTGCAGGCAAATGTGA3'   |     |
| novel_mir_461  | F:5'TGGAGGAGGAATGGGGAGGACA3'   |     |

|               |                              |
|---------------|------------------------------|
| novel_mir_474 | F:5'TGGGGAGGGCCGGACAGAGC3'   |
| novel_mir_243 | F:5'CGGGGAGGCTGTGCAGCGCGGC3' |
| novel_mir_580 | F:5'AGAGGGGGTATAGCTCAGTGG3'  |
| novel_mir_409 | F:5'AACGGAGGCCTCTTACCAGC3'   |
| novel_mir_682 | F:5'AGGCCAGCGAGTAGAGAAGC3'   |
| U6            | F:5'GCTTCGGCAGCACATATACT3'   |

---
