# Supplementary material for: Integrated Analysis of the ceRNA Network and M-7474 Function in Testosterone-Mediated Fat Deposition in Pigs
Source: MDPI journal article supplement (doi:10.3390/genes13040668), 2022-04-10
Supplement: s1 [file s1]

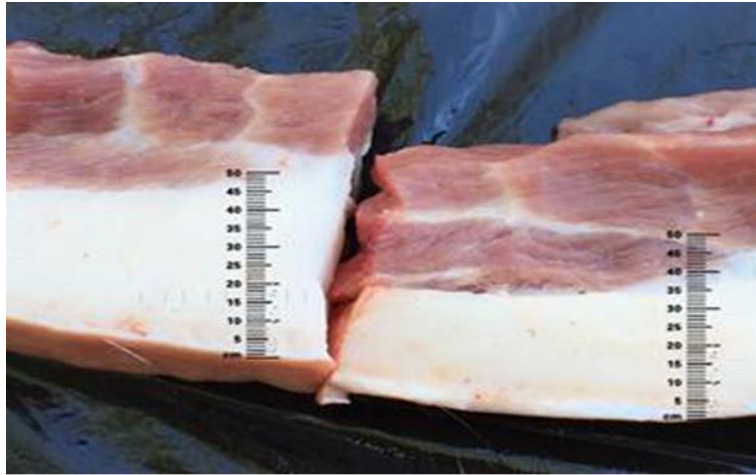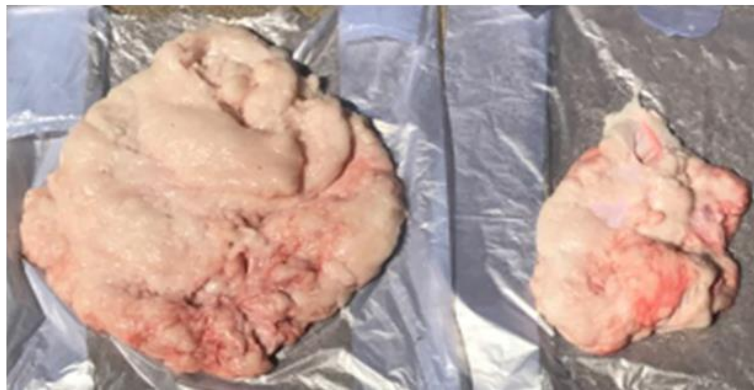

Figure S1. The left side shows the back fat and suet of the castrated pigs, and the right side shows the back fat and suet of the intact pigs

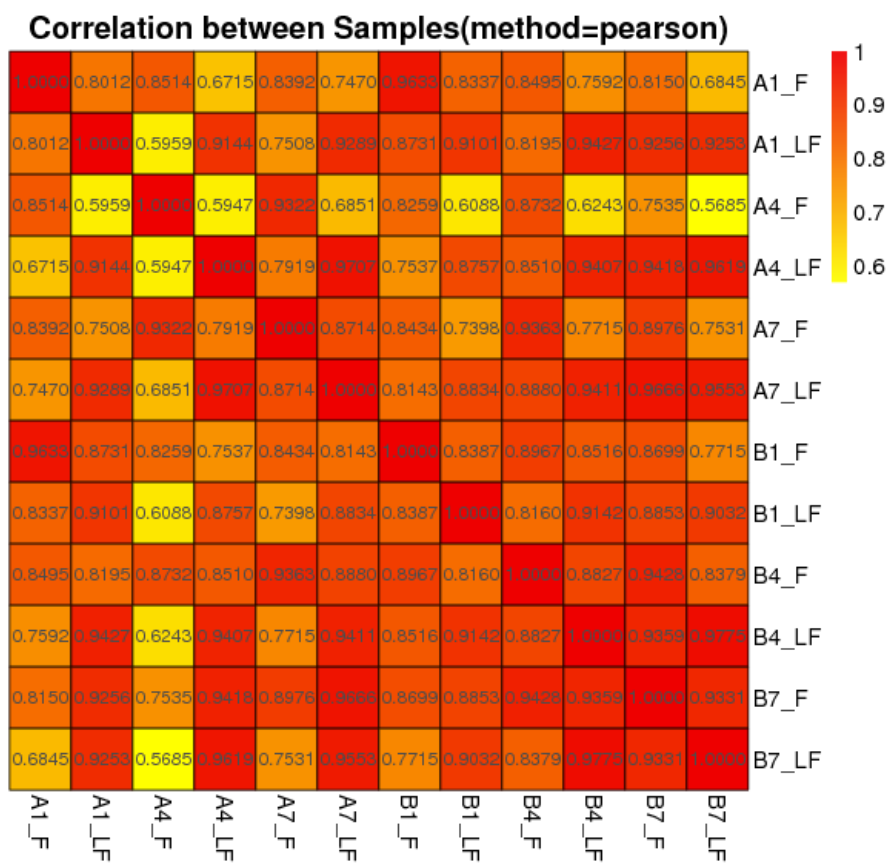

**Figure S2 .The Pearson correlation values**
