# Supplementary material for: Integrated Analysis of the ceRNA Network and M-7474 Function in Testosterone-Mediated Fat Deposition in Pigs
Source: MDPI journal article supplement (doi:10.3390/genes13040668), 2022-04-10
Supplement: s1 [file s1]

Table S1.Sample collection information

|                                       | <b>A1(intact)</b> | <b>B1(castration)</b> | <b>A4(intact)</b> | <b>B4(castration)</b> | <b>A7(intact)</b> | <b>B7(castration)</b> |
|---------------------------------------|-------------------|-----------------------|-------------------|-----------------------|-------------------|-----------------------|
| Live weight (Kg)                      | 150               | 140.5                 | 166.5             | 154                   | 134               | 112                   |
| carcass weight (Kg)                   | 112.6             | 107.9                 | 128.2             | 119.2                 | 100               | 85.7                  |
| First back fat thick (mm)             | 37.76             | 44.90                 | 34.66             | 48.73                 | 39.63             | 47.25                 |
| Finally back fat thick (mm)           | 12.04             | 30.040                | 16.79             | 25.25                 | 9.43              | 25.01                 |
| Finally lumbar backfat thickness (mm) | 8.99              | 22.98                 | 9.93              | 22.38                 | 9.41              | 19.03                 |
| leaf fat (Kg)                         | 0.494             | 1.528                 | 0.742             | 1.114                 | 0.338             | 0.828                 |
