# Supplementary material for: Integrated Analysis of the ceRNA Network and M-7474 Function in Testosterone-Mediated Fat Deposition in Pigs
Source: Genes (Basel). 2022 Apr 10;13(4):668. doi: 10.3390/genes13040668 (PMC9032878; doi:10.3390/genes13040668)
Supplement: Supplementary file 1 [file genes-13-00668-s001.zip]

Archive with 6 entries (6 files):
- Additional fileS1.Table S1.pdf
- Additional fileS1.Table S2.pdf
- Additional fileS1.Table S3.pdf
- Additional fileS1.Table S4-S5.pdf
- Additional fileS2.Table S1-S13.xlsx
- Additional fileS3.Figure S1-S2.pdf
