# Supplementary material for: Integrated Analysis of the ceRNA Network and M-7474 Function in Testosterone-Mediated Fat Deposition in Pigs
Source: Genes (Basel). 2022 Apr 10;13(4):668. doi: 10.3390/genes13040668 (PMC9032878; doi:10.3390/genes13040668)
Supplement: Supplementary file 1 [file genes-13-00668-s001.zip › Additional fileS2.Table S1-S13.xlsx]

## Sheet: Table S1
Table S1.The statistical data of known miRNA in each sample
	#of_miRNAs	#of_miRNA*	#of_miRNA-5p	#of_miRNA-3p	#of_hairpin	#unique_sRNAs_match_hairpin	#total_sRNAs_match_hairpin
Known miRNA in miRbase	166	0	120	125	382	-	-
A1_F	150	0	78	75	273	4539	14587758
A1_LF	153	0	79	78	278	4681	13939686
A4_F	151	0	78	76	273	4561	14695448
A4_LF	150	0	77	74	273	4536	15164804
A7_F	153	0	77	78	278	4563	14176890
A7_LF	154	0	80	74	279	4573	14326414
B1_F	155	0	75	79	281	4657	14492710
B1_LF	148	0	77	76	271	4407	11513356
B4_F	149	0	80	72	273	4460	13591035
B4_LF	150	0	77	78	277	4603	13996238
B7_F	148	0	74	72	268	4316	13758279
B7_LF	150	0	74	79	274	4600	13566833

## Sheet: Table S2
Table S2. Each individual is annotated with mature miRNAs
miR_name	A1_F	A1_LF	A4_F	A4_LF	A7_F	A7_LF	B1_F	B1_LF	B4_F	B4_LF	B7_F	B7_LF
ssc-miR-148a-3p	2906566	2705689	2515632	2852361	2571874	2514879	2118144	1905798	2607649	2472960	3743816	2017526
ssc-miR-99a	1354855	953030	1423239	839723	1291628	852903	1185963	818726	1310215	884676	1339060	684421
ssc-miR-26a	1213259	1637007	1170638	1441558	1269855	1561083	1230416	1280628	1177461	1209157	950414	1372716
ssc-let-7i	1009626	619931	1294637	713180	1041710	809504	1203247	676715	999043	762981	977696	661421
ssc-miR-143-3p	811740	954495	424531	722331	1100322	1097742	647767	509409	523703	1003200	644081	803692
ssc-miR-126-3p	720908	1124377	451959	1214459	598652	808523	541409	741415	632159	1230152	899901	1036665
ssc-let-7a	695845	545765	1083391	1161093	864685	1019574	951119	758118	847208	822893	667446	895394
ssc-miR-10b	600257	727669	548551	1109068	547027	685531	764368	677630	437135	787652	429382	1165875
ssc-miR-199a-3p	497167	211212	591102	93358	331677	217402	502677	202551	370447	130376	172551	104730
ssc-miR-199b-3p	497141	211209	591059	93354	331652	217397	502665	202541	370407	130363	172532	104724
ssc-miR-199a-5p	481967	211965	718851	123931	467558	280103	597638	178249	467052	133866	316408	120185
ssc-miR-21	360425	158676	497564	193029	324257	299888	449552	175281	421708	183925	460302	225168
ssc-miR-100	305416	230712	386804	245279	308804	262431	529853	194100	315653	175803	155774	196262
ssc-let-7f	298593	260709	375594	496833	310548	427314	365242	273006	298122	334965	256844	389981
ssc-miR-30d	277434	337763	218393	311574	229458	285461	254629	279930	236239	311334	219392	342452
ssc-let-7c	224184	161107	362261	331751	301155	261444	267850	207334	316788	262533	225727	232371
ssc-miR-27b-3p	222165	207097	139944	153130	186738	190485	175883	122950	142816	199110	140290	171224
ssc-let-7g	200726	161270	179776	199625	149792	207473	208248	165101	156792	168668	126551	177230
ssc-miR-125b	174136	173311	226159	258769	216760	173596	242309	122355	193544	148586	114473	155986
ssc-miR-24-3p	145165	128651	133493	95757	135603	103801	179264	82181	155368	139546	128874	124003
ssc-miR-10a-5p	141849	172891	102517	212395	100021	202984	159266	215267	93407	181014	80862	193297
ssc-miR-30a-5p	130106	184701	75020	121158	99266	178792	104965	136517	94179	149065	76587	164472
ssc-miR-125a	119411	188572	134353	356213	147676	180623	147741	148749	156558	229002	144278	261956
ssc-miR-151-3p	89260	121076	70057	129316	81224	100124	91557	111446	96068	152345	193651	141142
ssc-miR-378	82893	124059	51122	115109	83296	109302	78896	103859	81991	160279	69966	165438
ssc-miR-22-3p	73850	72135	68080	58197	54432	50749	62067	56531	69369	92014	45191	88259
ssc-miR-191	73566	113275	64694	121851	76801	95747	68482	134180	76298	135220	70181	138026
ssc-miR-27a	73008	65829	68617	52915	90087	46695	78271	23057	76996	72626	66714	66101
ssc-miR-199b-5p	70003	32345	94564	31541	56933	47642	88654	45065	50044	18196	22635	26445
ssc-miR-423-3p	63478	78981	65285	69418	59179	68888	66293	67036	68455	80754	42915	78682
ssc-miR-30c-5p	59687	80168	43349	80823	52631	65366	47066	64703	53208	82798	43982	79254
ssc-miR-152	58315	35065	59914	25083	41776	31907	60038	28918	49026	35418	28540	24984
ssc-miR-92a	56058	68204	46104	67300	51730	61659	43586	54663	45866	60979	41574	61144
ssc-miR-101	44314	50064	41624	38466	48101	53430	40656	31542	41373	51064	40413	45986
ssc-miR-181a	41824	49256	36145	30371	41022	35278	28810	32652	31319	35390	29796	35705
ssc-miR-99b	38254	53960	33308	66510	47628	41028	42718	41790	41600	59589	35865	60530
ssc-let-7d-5p	34197	35609	45347	49274	37782	41680	41991	38329	47403	57568	30468	49819
ssc-miR-140-3p	33320	29861	30512	15968	29128	26165	38707	21232	23265	24412	16814	21346
ssc-miR-423-5p	33196	61087	52126	130789	46464	53820	40838	48818	63987	96201	53857	113730
ssc-miR-532-5p	32119	24338	41332	22416	25967	24238	37635	19466	24246	16217	13940	22589
ssc-miR-320	28366	31971	42673	35393	43594	41022	32504	34924	38769	42739	26242	44878
ssc-miR-146a-5p	25592	20232	22883	11109	23174	31124	22584	24270	23836	22457	21019	21524
ssc-miR-1468	24990	53555	15732	116767	27575	45079	21240	30712	23402	72590	45256	88927
ssc-miR-23a	24547	13255	24610	8348	17589	13134	32919	41461	22266	12081	13869	9458
ssc-let-7e	24267	34476	32565	91335	31293	43390	35151	32837	36167	51778	33150	60507
ssc-miR-103	23683	29631	18991	21407	19863	20965	24598	25646	25637	41304	13682	36202
ssc-miR-7134-3p	22650	31065	21665	37788	17066	9357	24004	26743	23527	43559	21002	44239
ssc-miR-29a	21769	18762	18077	12936	17170	15176	15389	12560	14814	12266	11901	11196
ssc-miR-186	21108	21253	19504	18104	18639	20909	18870	15487	13424	14032	10148	20610
ssc-miR-193a-5p	20290	38966	14778	40811	15763	29095	22365	25962	24538	47252	17720	41496
ssc-miR-30e-5p	17923	20322	14292	12587	15464	19758	12691	14454	14020	16331	12273	17155
ssc-miR-145-3p	17644	27774	12358	25300	29270	30427	12652	17325	17261	28088	15681	27322
ssc-miR-127	14824	6845	20255	6079	9517	10913	14071	7989	8836	4944	4798	4110
ssc-miR-28-3p	13392	14027	10929	7153	14127	12186	11559	12601	10621	12216	10071	10319
ssc-miR-128	11483	16417	12701	26102	17811	20433	12265	13240	16205	25710	20972	24788
ssc-miR-126-5p	11164	15019	6866	13809	7631	11339	7386	9379	6830	13773	7566	12717
ssc-miR-374a-5p	11072	10466	11644	13079	11590	13168	9682	6234	9436	10444	6899	9091
ssc-miR-30a-3p	10960	15264	7360	20790	8899	15048	9733	13436	10471	20726	11300	16378
ssc-miR-450c-5p	10728	5032	18527	6663	10568	9348	12009	5848	13217	6239	8379	4706
ssc-miR-181b	10704	14073	7902	8413	9938	10058	7698	10218	7454	10639	8015	10285
ssc-miR-148b-3p	9955	8641	9643	8450	8037	8055	9511	7215	8723	8985	5900	8689
ssc-miR-30e-3p	9606	8943	9228	12800	8904	9682	9238	8761	9731	11800	9837	8475
ssc-miR-455-5p	9540	7707	8101	6354	8408	5782	6688	4517	9408	5986	8366	3456
ssc-miR-139-5p	9417	14187	5234	17791	7629	8832	7163	12744	8450	14366	16964	11867
ssc-miR-23b	8069	7136	5581	4452	6875	6929	7395	19087	6029	7339	5097	5020
ssc-miR-98	7744	9715	9146	15360	8372	12477	9388	8904	9370	16118	10631	13392
ssc-miR-339-5p	7396	7930	5089	3935	6413	5758	4549	4593	3873	4563	3965	4004
ssc-miR-1307	6893	9295	6970	12745	8049	10164	7720	9457	9775	15409	10921	12655
ssc-miR-450a	6735	3374	11197	4220	6267	5751	7690	3410	7857	3728	5986	3163
ssc-miR-16	6409	4821	5814	4556	4563	4444	5171	3818	4302	4291	3606	4415
ssc-miR-7	6060	6964	7928	11662	6621	11309	7896	9678	8313	14658	12598	15323
ssc-miR-378b-3p	5955	9256	3227	6941	5550	6734	5038	5156	5130	11603	6460	9366
ssc-miR-451	5772	19028	3312	15945	6145	13478	6284	27913	9745	22609	19517	23467
ssc-miR-30b-5p	5263	5733	3008	3097	3501	4138	3363	4162	2936	3848	2551	3498
ssc-miR-185	5108	6031	4326	3479	2196	5253	7009	6085	4997	4476	2030	3782
ssc-miR-218	5103	4550	5976	3391	6152	6245	5376	8132	6401	4784	8260	3251
ssc-miR-218-5p	5103	4550	5976	3391	6152	6245	5376	8132	6401	4784	8260	3251
ssc-miR-218b	5102	4549	5977	3392	6146	6241	5372	8129	6404	4783	8251	3253
ssc-miR-24-1-5p	5092	3785	6339	3400	5190	3210	7946	3594	7008	4122	6052	3547
ssc-miR-195	5070	3137	7265	2660	3660	3524	4266	2763	4757	2366	2557	1751
ssc-miR-145-5p	4915	4682	1620	1522	5622	4203	5894	14215	2594	3889	2184	4059
ssc-miR-222	4885	5026	6068	5003	7993	6886	7734	6544	8014	7261	10225	8274
ssc-miR-143-5p	4821	5441	2173	2242	5908	4793	2510	1519	2427	3709	2149	2827
ssc-miR-374a-3p	4749	4629	5737	6474	4955	6489	4437	3271	5568	6032	3058	5520
ssc-miR-146b	4452	2998	3502	1916	4806	3497	3734	5949	5775	3367	9918	6010
ssc-miR-221-3p	4422	3634	3773	1671	4816	3631	4999	4091	4635	3500	4212	2662
ssc-miR-140-5p	4374	4287	5447	3921	4000	4243	5902	3255	3640	3878	2627	3554
ssc-miR-450b-5p	4113	2004	8097	2280	4376	4216	4611	1896	4934	2327	2789	1949
ssc-miR-361-3p	3835	4681	3235	5537	3602	4262	3559	4428	4157	6624	6140	6756
ssc-miR-340	3816	3915	3910	5236	3006	4815	3868	4067	3565	5891	2808	5112
ssc-miR-148a-5p	3801	3999	4451	4244	3683	3755	2917	2669	4229	3691	2496	3179
ssc-miR-28-5p	3773	3757	3919	3342	4281	4139	3692	2652	3609	3961	2249	3103
ssc-miR-20a	3723	4660	2578	3535	2876	4172	2553	3204	2362	3770	1752	4198
ssc-miR-708-5p	3648	5644	1854	4983	2469	3088	2114	2556	2127	4765	1007	4400
ssc-miR-214	3624	1829	4300	1085	2976	1818	4436	1447	3339	1340	1848	1090
ssc-miR-744	3269	3424	3685	3878	3225	3040	3996	3564	4684	3884	4406	2865
ssc-miR-95	3216	3699	2011	4110	1965	2502	2307	2450	2398	3658	2363	3226
ssc-miR-339	3114	3571	2101	1350	3125	2505	1538	1222	1602	1960	1919	1606
ssc-miR-122	2988	11689	4573	2925	2895	15179	24912	9162	2373	3983	2181	10181
ssc-miR-499-5p	2936	3719	2208	3283	2115	3115	2797	2533	2517	3515	2575	3332
ssc-miR-22-5p	2908	3187	3245	3192	2428	2415	2742	2755	3384	4165	3592	3782
ssc-miR-497	2691	1865	3765	1268	2246	1937	2584	1637	2521	1245	1267	987
ssc-miR-3613	2631	1198	2943	1952	2040	1887	2576	1154	2004	1343	2074	1256
ssc-miR-142-5p	2459	4236	1997	3889	2886	5296	2006	3433	2068	4663	2987	6572
ssc-miR-328	2450	3663	3430	6562	1871	2624	1799	1525	4398	5706	2547	4600
ssc-miR-155-5p	2377	1245	2477	709	1533	1794	1390	1237	1348	725	1478	730
ssc-miR-676-3p	2315	3439	2548	4902	2620	3947	3302	3996	3067	4704	3451	3680
ssc-miR-1343	2265	3695	2220	5642	2111	2588	2261	3254	3390	5716	2775	6093
ssc-miR-370	2109	1176	4434	1801	2825	4405	2746	2485	2746	2172	1878	1128
ssc-miR-32	2084	1875	1730	1974	1781	2242	2031	2119	3103	3770	2771	3291
ssc-miR-452	2036	95	3703	234	2524	952	2355	100	3505	85	4262	62
ssc-miR-574	1952	1605	2206	1159	1240	1279	2088	2970	1969	1377	996	1246
ssc-miR-363	1863	2615	1597	3601	3939	3607	2062	1522	2452	2901	2874	2493
ssc-miR-1	1830	1726	1444	1394	5513	5865	2361	1218	1403	2541	1343	12012
ssc-miR-4334-3p	1756	1948	1224	741	1667	1381	599	340	813	1096	1112	725
ssc-miR-181d-5p	1670	1771	1871	1011	1633	1373	1634	1454	1472	1410	1035	994
ssc-miR-361-5p	1640	1810	1395	1364	1224	1419	1418	1490	1049	1310	787	1260
ssc-miR-149	1621	1969	1399	2389	1483	1563	1240	1205	1487	2371	1235	2203
ssc-miR-708-3p	1613	2327	823	2260	1314	1267	920	905	1083	1970	1338	1823
ssc-miR-17-5p	1515	2087	1176	1716	1226	1621	1111	1481	1336	1947	1260	1592
ssc-miR-150	1456	3183	845	4120	2299	4212	1604	4666	1411	4216	1716	6476
ssc-miR-9	1412	2836	902	5775	2187	4770	2385	1208	1335	2278	3137	2401
ssc-miR-9-1	1412	2836	902	5773	2187	4769	2385	1208	1335	2277	3137	2401
ssc-miR-9-2	1412	2836	902	5773	2187	4769	2385	1208	1335	2277	3137	2401
ssc-miR-374b-5p	1407	1619	1121	1523	1143	1424	1151	1139	1229	1644	778	1463
ssc-miR-224	1397	63	3346	130	1908	503	2511	120	4180	60	5954	96
ssc-miR-139-3p	1381	2694	1230	5884	1068	2038	1440	1950	1657	3018	2360	3481
ssc-miR-769-5p	1358	1487	1054	1173	1160	1228	1248	1149	1149	1387	739	1619
ssc-miR-425-5p	1342	1943	930	1844	1328	1459	1121	1577	1305	2552	2086	2337
ssc-miR-30c-3p	1307	2333	692	2131	967	1627	1123	1808	1124	2755	1188	3014
ssc-miR-542-3p	1271	724	2249	821	1553	1544	1295	561	1563	721	794	623
ssc-miR-296-3p	1269	1246	1665	1727	1380	1539	1361	1141	1590	1395	1014	1154
ssc-miR-7134-5p	1263	1601	1141	2468	1039	1500	1333	1620	1271	2517	1276	2323
ssc-miR-107	1256	1419	1078	1127	974	1040	1120	1187	1096	1817	775	1827
ssc-miR-455-3p	1214	966	1120	960	830	774	921	724	942	550	576	454
ssc-let-7d-3p	1173	1666	935	3081	1588	1436	1568	1666	862	2225	1291	3733
ssc-miR-504	1138	895	2065	837	984	1204	769	425	1247	1200	976	1364
ssc-miR-382	1112	535	2009	774	972	300	1372	1022	1103	726	536	445
ssc-miR-151-5p	1095	1392	931	1068	897	936	1027	976	939	1131	812	1132
ssc-miR-500	1029	659	1371	531	733	668	1140	676	813	539	575	531
ssc-miR-133a-3p	970	1263	505	335	2245	1432	1133	707	677	927	532	3779
ssc-miR-1285	957	578	1256	563	1162	891	997	714	837	363	730	740
ssc-miR-486	906	812	949	1710	1273	612	711	1650	1071	1839	598	1716
ssc-miR-129a-5p	871	739	564	1157	875	697	606	694	645	944	841	1041
ssc-miR-129b	871	739	564	1157	875	697	605	695	645	944	841	1042
ssc-miR-24-2-5p	824	1030	567	795	1065	875	791	698	673	931	1027	857
ssc-miR-206	813	246	3244	282	2961	1422	4580	288	4829	701	2947	13962
ssc-miR-424-3p	758	468	1414	634	847	831	763	386	856	418	634	448
ssc-miR-505	692	1070	917	1179	801	996	812	1056	979	1274	1076	1299
ssc-miR-664-5p	685	1266	663	1864	605	1071	888	1176	1002	1697	833	1774
ssc-miR-425-3p	652	737	378	625	482	631	474	574	388	691	290	748
ssc-miR-29b	629	784	468	552	460	690	467	690	436	848	506	748
ssc-miR-19b	620	741	537	638	544	761	552	654	365	396	245	612
ssc-miR-142-3p	600	818	767	828	846	1283	428	790	693	981	1051	1060
ssc-miR-192	595	1636	584	780	650	1428	1008	1089	405	1411	414	1216
ssc-miR-671-3p	593	442	1030	717	676	453	661	472	775	499	605	483
ssc-miR-411	553	273	833	708	847	610	1273	494	632	370	286	292
ssc-miR-182	519	1008	436	1349	534	807	536	942	621	1711	818	1842
ssc-miR-148b-5p	483	487	518	450	458	473	445	477	482	533	337	478
ssc-miR-331-5p	482	498	300	451	346	435	356	388	394	544	571	431
ssc-miR-34a	459	631	270	419	362	486	409	476	376	626	248	657
ssc-miR-10a-3p	447	613	303	401	311	519	411	538	319	600	221	486
ssc-miR-7142-3p	416	551	349	646	468	502	387	417	490	684	503	618
ssc-miR-362	380	322	578	368	361	328	371	213	305	273	248	368
ssc-miR-29c	374	431	283	285	318	371	217	260	273	371	196	279
ssc-miR-1306-3p	364	465	434	715	381	416	374	398	557	859	959	719
ssc-miR-365-3p	363	473	192	355	248	320	410	1088	235	478	174	507
ssc-miR-342	357	256	174	233	234	256	213	406	204	265	275	353
ssc-miR-9843-3p	343	304	295	187	323	262	401	284	345	312	329	360
ssc-miR-503	333	276	739	550	431	529	359	253	540	350	289	245
ssc-miR-15b	332	296	325	204	197	233	289	295	207	268	187	185
ssc-miR-758	323	91	519	102	245	189	308	143	252	69	97	47
ssc-miR-365-5p	297	873	381	1457	435	611	408	645	805	1308	598	1306
ssc-miR-221-5p	297	208	263	153	297	321	309	306	246	249	295	257
ssc-miR-27b-5p	281	415	519	461	404	352	480	353	613	451	313	424
ssc-miR-2320-5p	281	205	307	181	220	230	323	280	271	235	201	174
ssc-miR-323	267	254	542	275	271	424	345	273	269	146	155	169
ssc-miR-184	261	516	345	589	739	1336	677	689	804	2075	3080	4182
ssc-miR-421-3p	260	445	306	362	290	313	320	277	346	476	178	402
ssc-miR-628	251	264	266	306	327	231	286	221	319	279	179	241
ssc-miR-194a	244	453	187	225	263	382	235	410	216	404	179	248
ssc-miR-874	241	269	255	234	277	229	257	277	214	242	143	201
ssc-miR-136	238	105	429	61	194	151	252	120	220	54	161	46
ssc-miR-424-5p	233	117	354	64	257	172	158	62	174	90	83	57
ssc-miR-493-5p	226	55	364	74	156	146	348	99	199	60	68	27
ssc-miR-196a	219	2174	86	8764	140	155	93	166	95	3107	408	3270
ssc-miR-92b-3p	213	240	274	355	325	234	304	205	197	196	194	296
ssc-miR-1249	199	336	104	228	87	250	252	463	189	293	296	522
ssc-miR-2483	198	319	148	314	233	262	232	262	191	272	88	205
ssc-miR-30b-3p	190	356	257	545	238	257	166	215	334	406	203	469
ssc-miR-15a	186	153	207	135	191	135	171	107	137	153	136	123
ssc-miR-432-5p	183	118	413	239	229	260	344	195	317	206	155	114
ssc-miR-615	177	162	282	228	200	156	202	71	298	279	279	182
ssc-miR-1296-5p	176	149	115	141	130	138	145	84	120	128	116	127
ssc-miR-30c-1-3p	171	206	182	286	148	165	151	140	175	224	147	221
ssc-miR-130a	170	167	219	123	210	181	208	164	170	150	124	122
ssc-miR-331-3p	164	185	106	104	131	111	98	96	122	169	81	135
ssc-miR-369	161	67	288	78	104	189	177	76	111	52	51	46
ssc-miR-345-3p	157	243	108	134	132	143	121	113	108	248	99	220
ssc-miR-493-3p	145	45	247	50	129	114	192	60	142	75	118	24
ssc-miR-144	142	424	77	251	122	313	138	330	247	509	186	419
ssc-miR-181c	142	146	201	76	185	107	108	112	155	84	72	72
ssc-miR-664-3p	137	141	74	121	106	118	107	192	94	164	48	144
ssc-miR-1306-5p	128	117	77	75	100	114	161	174	96	91	70	162
ssc-miR-491	118	101	102	85	85	41	125	128	111	114	67	84
ssc-miR-1839-5p	114	74	106	88	72	92	100	126	144	132	48	114
ssc-miR-450c-3p	110	64	251	76	112	102	99	52	152	56	51	57
ssc-miR-204	99	160	145	185	271	173	163	397	134	174	73	98
ssc-miR-2320-3p	94	126	134	243	144	167	163	148	196	307	138	280
ssc-miR-7136-5p	93	48	35	45	55	76	42	33	34	45	83	28
ssc-miR-212	91	186	84	309	129	106	114	113	165	166	244	194
ssc-miR-671-5p	82	65	138	66	108	87	124	71	73	89	48	68
ssc-miR-296-5p	77	65	67	27	61	36	118	41	69	37	26	45
ssc-miR-7137-5p	76	121	72	92	68	86	66	57	68	78	56	117
ssc-miR-183	74	113	59	72	365	855	242	73	146	108	124	83
ssc-miR-193a-3p	73	100	52	53	68	77	35	37	70	88	51	46
ssc-miR-326	73	71	46	63	57	64	40	62	61	58	75	48
ssc-miR-7135-3p	71	53	83	65	59	39	29	19	52	58	33	48
ssc-miR-210	71	36	115	36	110	55	61	37	57	44	32	31
ssc-miR-19a	69	85	67	76	69	98	50	71	53	58	39	92
ssc-miR-133b	60	61	17	13	77	57	42	24	14	21	16	71
ssc-miR-9841-3p	55	58	45	48	38	29	58	79	44	31	51	48
ssc-miR-7137-3p	51	80	53	99	45	71	54	44	61	156	93	138
ssc-miR-490-3p	50	139	63	81	58	149	26	250	32	76	59	87
ssc-miR-490	50	139	63	81	58	149	26	250	32	76	59	87
ssc-miR-532-3p	50	41	64	41	37	24	61	81	50	16	38	46
ssc-miR-190a	49	89	57	76	55	67	47	52	55	74	38	118
ssc-miR-132	47	131	44	136	57	51	56	89	55	92	124	82
ssc-miR-582	47	47	29	45	35	30	44	51	27	45	27	23
ssc-miR-2411	46	50	36	75	42	64	48	57	47	94	69	93
ssc-miR-374b-3p	44	48	46	39	34	53	42	34	70	56	33	43
ssc-miR-335	44	39	105	26	55	55	55	35	44	14	6	24
ssc-miR-130b	43	23	44	44	36	46	31	36	42	50	45	36
ssc-miR-769-3p	42	48	39	28	42	35	41	29	29	50	30	33
ssc-miR-299	40	13	53	12	33	11	41	40	19	12	4	10
ssc-miR-6782-3p	39	45	22	47	11	27	8	15	26	63	26	83
ssc-miR-9860-5p	38	59	43	55	42	65	39	46	59	72	74	86
ssc-miR-205	35	85	17	3	460	23	112	528	276	61	130	38
ssc-miR-106a	33	43	15	57	41	59	23	14	35	34	16	48
ssc-miR-18a	33	40	34	33	26	45	34	27	42	49	31	40
ssc-miR-1277	33	16	18	12	27	14	14	9	25	21	10	16
ssc-miR-338	31	47	16	94	177	116	96	12	38	26	31	24
ssc-miR-20b	31	42	29	89	64	74	32	28	46	63	38	56
ssc-miR-135	31	3	10	3	34	9	22	5	11	3	0	4
ssc-miR-7144-5p	29	45	45	44	41	31	45	46	31	61	36	57
ssc-miR-4331	28	25	14	29	30	11	63	19	29	16	72	29
ssc-miR-196b-5p	27	4038	14	5308	141	805	47	491	14	4523	149	3785
ssc-miR-219a	26	19	34	39	27	11	38	29	31	58	21	51
ssc-miR-885-3p	25	42	32	43	22	39	28	43	34	55	36	39
ssc-miR-215	25	27	51	25	23	28	36	37	25	28	28	29
ssc-miR-133a-5p	23	21	12	9	40	28	19	12	19	33	14	81
ssc-miR-34c	21	65	4	7	9	17	7	1	5	11	9	26
ssc-miR-92b-5p	21	36	27	42	27	24	60	25	42	23	16	16
ssc-miR-17-3p	20	26	9	8	23	26	16	15	15	31	14	17
ssc-miR-885-5p	20	19	12	13	23	24	28	81	17	22	10	39
ssc-miR-4332	20	11	19	6	27	16	11	12	11	9	15	13
ssc-miR-217	18	20	27	12	51	16	34	123	20	19	22	27
ssc-miR-450b-3p	18	10	29	5	17	14	15	8	18	5	16	4
ssc-miR-545-3p	17	13	22	10	24	19	20	16	36	12	11	10
ssc-miR-7135-5p	15	21	13	14	20	13	0	0	0	0	0	0
ssc-miR-105-1	14	18	9	5	17	5	11	5	18	14	19	0
ssc-miR-2366	13	14	16	4	14	10	51	8	32	27	27	5
ssc-miR-137	13	12	6	10	6	3	4	6	5	21	5	9
ssc-miR-7143-3p	13	8	15	5	19	16	14	5	21	13	15	10
ssc-miR-216	11	9	6	3	24	8	14	41	12	6	8	14
ssc-miR-7857-3p	10	25	8	66	44	47	38	17	21	57	55	122
ssc-miR-7139-5p	9	20	20	79	21	24	22	20	25	67	45	61
ssc-miR-339-3p	9	7	7	8	20	9	9	1	8	7	4	11
ssc-miR-324	7	12	17	11	11	12	21	9	21	20	10	15
ssc-miR-7136-3p	7	2	4	1	2	6	6	3	2	0	4	3
ssc-miR-190b	6	5	7	5	6	5	6	2	5	2	0	4
ssc-miR-31	5	25	2	19	5	55	3	13	1	9	2	10
ssc-miR-1271	5	19	6	9	13	7	2	0	3	13	3	2
ssc-miR-551a	5	18	4	0	3	14	15	13	9	25	5	2
ssc-miR-676-5p	5	10	7	12	6	6	10	3	8	10	12	6
ssc-miR-345-5p	5	9	5	2	6	4	8	10	5	3	7	8
ssc-miR-96-5p	5	5	3	5	22	29	2	7	11	5	15	7
ssc-miR-155-3p	5	4	1	0	2	0	1	0	0	1	2	0
ssc-miR-381	5	2	9	2	4	4	1	1	2	3	3	0
ssc-miR-129a-3p	4	7	5	1	7	3	3	9	5	2	0	9
ssc-miR-542-5p	4	5	12	3	3	3	5	3	12	1	2	1
ssc-miR-9820-5p	4	5	2	16	3	7	2	3	13	9	5	13
ssc-miR-487b	4	4	16	3	4	8	10	2	8	0	10	4
ssc-miR-9858-5p	3	11	3	3	4	3	1	12	4	5	4	5
ssc-miR-138	3	6	1	5	9	2	9	8	0	2	1	1
ssc-miR-187	3	5	4	2	8	2	3	5	7	4	7	5
ssc-miR-218-3p	3	4	1	4	2	3	8	1	2	4	2	1
ssc-miR-376c	3	3	8	2	5	1	14	5	0	1	1	1
ssc-miR-371-5p	3	1	0	1	0	0	0	0	1	3	0	0
ssc-miR-325	3	1	0	0	3	1	1	0	5	0	0	0
ssc-miR-194b-5p	2	10	11	8	4	7	11	9	2	3	5	6
ssc-miR-376a-3p	2	2	5	1	2	0	4	3	0	2	0	4
ssc-miR-545-5p	2	1	1	3	1	1	1	3	2	1	1	2
ssc-miR-652	2	1	1	1	0	2	2	2	1	4	2	4
ssc-miR-202-5p	2	0	2	0	0	1	0	2	1	0	0	0
ssc-miR-7139-3p	1	7	1	22	2	4	5	11	11	16	10	16
ssc-miR-9851-3p	1	4	2	0	1	1	0	0	0	0	0	1
ssc-miR-7141-5p	1	1	2	1	0	0	3	0	1	1	7	0
ssc-miR-489	1	1	0	1	4	1	4	0	0	2	1	1
ssc-miR-153	1	1	0	0	1	0	2	0	2	0	0	0
ssc-miR-202-3p	1	0	0	0	1	0	1	1	0	1	0	1
ssc-miR-1839-3p	1	0	0	0	0	0	0	11	0	1	0	0
ssc-miR-7140-5p	1	0	0	0	0	0	0	0	0	0	0	0
ssc-miR-429	0	5	1	0	11	8	1	2	4	9	1	2
ssc-miR-196b-3p	0	5	0	6	0	2	0	2	0	2	0	7
ssc-miR-499-3p	0	3	1	2	2	0	0	0	2	1	0	1
ssc-miR-9810-3p	0	2	3	0	0	1	0	4	0	0	0	3
ssc-miR-490-5p	0	2	2	0	0	1	0	0	0	0	0	0
ssc-miR-935	0	1	4	6	3	5	1	1	0	2	0	2
ssc-miR-376a-5p	0	1	4	0	0	1	6	2	5	0	0	0
ssc-miR-105-2	0	1	1	0	1	1	3	0	2	0	2	0
ssc-miR-9788-3p	0	1	0	1	0	0	0	1	0	1	1	0
ssc-miR-7140-3p	0	1	0	0	0	0	2	0	0	0	0	2
ssc-miR-421-5p	0	1	0	0	0	0	0	0	0	0	0	2
ssc-miR-18b	0	0	1	0	0	1	0	0	0	0	0	0
ssc-miR-432-3p	0	0	1	0	0	0	0	0	0	0	0	0
ssc-miR-7138-5p	0	0	0	2	5	1	0	1	0	1	0	0
ssc-miR-1224	0	0	0	1	0	0	0	0	0	0	0	0
ssc-miR-4338	0	0	0	1	0	0	0	0	0	0	0	0
ssc-miR-124a	0	0	0	0	1	2	12	0	0	0	0	1
ssc-miR-7142-5p	0	0	0	0	1	1	0	2	1	0	0	0
ssc-miR-7138-3p	0	0	0	0	1	0	1	0	1	1	0	0
ssc-miR-9822-3p	0	0	0	0	1	0	1	0	0	0	0	0
ssc-miR-9784-5p	0	0	0	0	1	0	0	0	1	1	0	0
ssc-miR-1296-3p	0	0	0	0	1	0	0	0	0	0	0	0
ssc-miR-219b-3p	0	0	0	0	0	2	213	0	0	1	5	17
ssc-miR-9819-5p	0	0	0	0	0	1	0	0	0	0	0	0
ssc-miR-9848-3p	0	0	0	0	0	0	3	0	0	0	0	0
ssc-miR-208b	0	0	0	0	0	0	1	0	0	1	0	2
ssc-miR-181d-3p	0	0	0	0	0	0	1	0	0	0	0	1
ssc-miR-7143-5p	0	0	0	0	0	0	0	0	2	0	0	0

## Sheet: Table S3
Table S3. Each individual is annotated with novel mature miRNAs
miR_name	A1_F	A1_LF	A4_F	A4_LF	A7_F	A7_LF	B1_F	B1_LF	B4_F	B4_LF	B7_F	B7_LF
novel_mir_96	400439	364783	662811	740105	562445	546744	469576	472505	555133	610586	460523	642184
novel_mir_48	39340	38074	44426	45584	43180	50397	35010	29893	35883	34851	27759	33387
novel_mir_84	31322	41932	23173	40036	27610	30316	28119	42668	30756	46394	29655	44527
novel_mir_141	14316	4894	21669	6805	8647	8643	13365	6581	9976	4360	6889	2984
novel_mir_26	12006	19661	10443	14924	12643	18558	12552	12198	12616	16177	8593	17899
novel_mir_97	3847	3374	6571	6602	4885	5225	5642	4309	5171	5977	3637	5651
novel_mir_99	3705	5451	4605	7297	2732	4184	3952	4721	3974	6865	4082	7172
novel_mir_155	3686	2267	7425	3392	3267	5576	5728	3021	3505	2506	1981	2135
novel_mir_86	3486	0	2732	3419	2754	0	2998	0	2961	0	3140	0
novel_mir_85	3192	3893	1986	2968	1989	2793	2338	2676	2221	3041	1551	3186
novel_mir_145	1035	427	1704	469	621	736	1223	629	816	362	534	200
novel_mir_144	593	637	1462	934	944	1571	995	1005	906	1059	821	609
novel_mir_139	569	0	0	817	0	828	673	827	0	1199	0	0
novel_mir_73	521	1067	441	1632	498	1423	575	0	689	1312	0	939
novel_mir_87	504	364	339	0	327	286	545	966	281	0	0	0
novel_mir_106	490	475	415	285	368	465	331	323	310	511	317	440
novel_mir_151	470	336	817	501	327	0	601	409	339	266	235	262
novel_mir_100	421	640	210	947	337	488	465	552	467	1390	546	1582
novel_mir_63	349	0	0	0	0	0	0	0	370	0	652	0
novel_mir_115	313	526	156	469	343	425	221	379	326	663	621	597
novel_mir_158	307	174	372	232	275	339	538	178	175	91	76	109
novel_mir_143	247	114	233	99	145	159	224	138	120	85	81	74
novel_mir_162	230	156	329	142	152	163	269	136	191	147	125	143
novel_mir_104	215	254	211	311	343	397	240	290	0	425	0	627
novel_mir_142	209	82	305	84	116	176	233	119	141	75	84	59
novel_mir_16	202	221	207	213	191	136	226	248	269	270	147	220
novel_mir_102	132	0	115	0	115	0	0	136	174	365	0	0
novel_mir_149	127	67	219	45	91	104	132	86	89	57	42	33
novel_mir_163	125	0	0	0	0	0	0	0	0	97	0	0
novel_mir_150	119	42	210	49	72	88	143	71	75	49	31	34
novel_mir_80	108	100	177	233	142	223	113	97	115	132	92	172
novel_mir_27	91	104	149	252	128	121	123	177	187	279	195	191
novel_mir_156	85	0	0	79	0	0	0	61	0	36	0	0
novel_mir_79	82	53	96	57	73	79	88	36	78	0	67	39
novel_mir_28	81	99	55	110	74	85	83	87	93	103	148	107
novel_mir_161	77	100	110	56	109	160	105	149	84	98	87	90
novel_mir_47	64	73	64	0	69	68	65	51	72	116	0	0
novel_mir_160	59	0	0	0	47	0	0	0	0	0	0	9
novel_mir_17	55	46	31	73	0	0	0	0	55	0	0	76
novel_mir_103	51	158	80	19	851	127	115	453	89	105	224	113
novel_mir_25	49	47	40	61	34	51	37	50	52	84	75	77
novel_mir_40	48	72	52	69	128	124	108	133	70	79	238	147
novel_mir_21	48	0	0	93	0	83	0	0	0	0	0	0
novel_mir_148	46	23	0	14	0	45	38	18	34	0	12	0
novel_mir_3	44	12	16	0	93	20	111	78	41	46	68	81
novel_mir_119	43	91	0	0	36	0	48	0	0	0	0	0
novel_mir_82	42	0	73	51	313	0	0	613	0	117	0	197
novel_mir_153	42	0	0	18	30	43	0	35	0	14	0	0
novel_mir_46	40	34	13	14	18	13	20	20	9	25	15	0
novel_mir_129	40	17	47	18	28	23	49	14	56	42	61	26
novel_mir_51	37	37	37	37	30	19	45	20	37	26	0	0
novel_mir_118	36	0	81	0	24	20	67	9	43	0	18	17
novel_mir_43	36	0	0	0	0	0	0	0	0	0	0	0
novel_mir_1	35	0	67	76	50	49	42	31	95	98	106	71
novel_mir_157	33	12	66	33	23	32	37	21	26	16	0	13
novel_mir_108	33	0	0	0	499	227	0	317	0	0	88	70
novel_mir_65	32	0	0	48	0	0	25	0	0	0	0	0
novel_mir_83	31	75	20	17	80	53	95	48	28	69	96	92
novel_mir_67	31	30	11	39	10	12	21	0	13	33	22	38
novel_mir_146	31	0	52	0	13	21	20	15	0	0	0	17
novel_mir_9	30	26	10	15	12	0	12	13	21	32	0	0
novel_mir_120	30	0	36	56	53	42	0	49	0	85	35	0
novel_mir_116	29	0	18	67	48	0	0	23	0	63	0	39
novel_mir_133	28	41	35	20	47	34	52	26	47	29	53	44
novel_mir_137	28	0	28	20	0	0	22	0	0	0	21	0
novel_mir_6	27	23	6	25	0	14	0	0	0	14	11	0
novel_mir_23	26	26	13	31	22	49	31	20	22	37	45	38
novel_mir_30	26	24	30	20	25	24	11	13	14	24	35	21
novel_mir_122	26	0	0	0	7	0	0	0	0	0	0	0
novel_mir_34	25	30	43	34	31	18	29	26	39	50	49	25
novel_mir_90	22	0	28	0	0	0	0	0	0	0	0	0
novel_mir_114	21	28	30	47	19	25	19	23	18	30	16	62
novel_mir_13	21	13	25	16	25	17	11	20	0	64	34	48
novel_mir_135	20	54	0	66	22	17	30	43	17	58	22	51
novel_mir_166	20	13	20	8	11	12	36	22	0	16	35	8
novel_mir_91	20	0	22	37	16	28	17	23	25	25	18	48
novel_mir_71	19	37	34	103	28	21	37	33	55	82	29	80
novel_mir_110	18	26	13	31	18	13	14	15	0	25	9	19
novel_mir_22	18	22	26	30	21	30	20	17	20	22	0	22
novel_mir_124	18	10	26	12	14	24	20	18	0	14	7	0
novel_mir_75	17	9	0	0	14	0	6	7	0	8	0	18
novel_mir_12	15	12	15	43	16	0	15	20	0	8	5	0
novel_mir_66	15	0	16	0	11	0	11	16	6	0	10	6
novel_mir_29	14	34	25	50	21	25	31	19	19	36	15	35
novel_mir_5	14	13	9	27	13	23	11	13	24	28	11	21
novel_mir_152	14	6	14	0	0	0	11	0	0	8	0	0
novel_mir_109	14	0	0	0	0	0	41	0	0	0	0	0
novel_mir_2	14	0	0	0	0	0	8	0	6	0	0	0
novel_mir_49	13	39	85	22	730	25	205	1356	13	169	94	342
novel_mir_14	13	5	11	0	6	13	12	11	18	23	0	12
novel_mir_33	12	0	0	41	0	13	0	0	0	0	0	42
novel_mir_4	12	0	0	7	8	11	0	0	0	7	5	0
novel_mir_15	11	23	19	17	18	14	25	19	29	0	13	0
novel_mir_121	11	18	8	17	0	14	20	25	0	34	34	64
novel_mir_147	11	6	26	19	0	31	0	21	29	26	17	15
novel_mir_127	11	0	10	0	19	0	0	0	0	0	0	0
novel_mir_117	11	0	0	22	0	0	0	13	13	0	7	0
novel_mir_123	11	0	0	9	10	17	0	0	9	12	0	0
novel_mir_92	11	0	0	0	0	0	0	0	0	0	0	0
novel_mir_168	10	16	0	0	0	0	8	0	0	7	0	19
novel_mir_52	10	11	7	0	0	0	5	0	7	0	5	5
novel_mir_70	10	11	0	0	0	0	0	0	0	0	0	0
novel_mir_140	10	0	10	0	6	5	5	6	5	0	5	0
novel_mir_24	10	0	0	13	0	6	0	0	0	0	0	0
novel_mir_36	10	0	0	0	20	12	0	20	0	0	0	0
novel_mir_98	10	0	0	0	8	8	12	5	6	0	7	0
novel_mir_35	9	24	10	14	21	24	8	12	10	23	9	18
novel_mir_7	9	12	11	8	9	8	8	9	6	13	38	22
novel_mir_132	9	11	18	0	12	9	15	7	22	0	21	17
novel_mir_105	9	8	5	0	6	6	7	0	11	13	7	0
novel_mir_45	9	0	25	0	9	0	19	0	0	0	0	0
novel_mir_159	9	0	13	0	0	0	11	0	0	0	0	0
novel_mir_167	9	0	8	0	6	0	10	6	7	0	0	5
novel_mir_111	9	0	7	0	6	6	7	5	0	0	0	0
novel_mir_32	9	0	0	0	0	0	0	0	5	8	0	0
novel_mir_54	9	0	0	0	0	0	0	0	0	5	8	0
novel_mir_113	9	0	0	0	0	0	0	0	0	0	0	0
novel_mir_31	9	0	0	0	0	0	0	0	0	0	0	0
novel_mir_74	8	17	6	22	13	22	6	12	11	23	0	22
novel_mir_89	8	16	17	11	0	0	7	0	0	6	0	0
novel_mir_131	8	12	0	0	0	17	9	0	0	15	13	0
novel_mir_57	8	8	0	0	0	0	0	18	8	25	0	15
novel_mir_138	8	5	0	13	0	0	6	0	10	22	0	8
novel_mir_93	8	5	0	13	0	0	0	0	0	0	0	0
novel_mir_55	8	0	0	16	7	9	0	0	0	20	0	0
novel_mir_164	8	0	0	0	11	20	21	0	0	0	0	0
novel_mir_78	8	0	0	0	9	0	0	7	7	0	0	0
novel_mir_42	8	0	0	0	0	0	0	0	21	0	0	0
novel_mir_81	8	0	0	0	0	0	0	0	0	0	0	0
novel_mir_60	7	13	0	0	0	9	0	0	0	0	6	7
novel_mir_169	7	12	0	26	25	21	16	0	0	0	9	0
novel_mir_136	7	12	0	0	0	0	0	0	0	0	0	0
novel_mir_38	7	11	0	0	0	0	0	21	11	15	0	20
novel_mir_50	7	7	0	5	7	7	0	7	0	9	13	0
novel_mir_101	7	5	0	11	0	10	0	9	11	16	0	13
novel_mir_165	7	5	0	0	16	0	0	6	0	0	0	0
novel_mir_37	7	0	14	0	10	0	12	8	7	5	0	0
novel_mir_134	7	0	0	0	0	12	0	11	0	10	0	0
novel_mir_44	7	0	0	0	0	0	0	0	0	0	9	0
novel_mir_20	7	0	0	0	0	0	0	0	0	0	0	0
novel_mir_94	7	0	0	0	0	0	0	0	0	0	0	0
novel_mir_61	6	11	0	22	10	0	0	0	0	6	12	12
novel_mir_39	6	8	0	7	0	6	5	0	0	13	10	0
novel_mir_112	6	7	12	0	6	0	5	10	8	6	5	0
novel_mir_77	6	0	12	15	10	10	0	15	18	21	10	16
novel_mir_62	6	0	8	0	8	0	0	5	0	0	0	7
novel_mir_76	6	0	7	11	19	0	13	0	17	22	18	17
novel_mir_95	6	0	7	7	0	0	5	0	5	14	7	12
novel_mir_171	6	0	7	0	0	0	0	0	0	0	0	6
novel_mir_170	6	0	0	21	0	0	0	11	0	0	18	0
novel_mir_69	6	0	0	0	0	0	0	0	0	0	0	5
novel_mir_125	6	0	0	0	0	0	0	0	0	0	0	0
novel_mir_126	6	0	0	0	0	0	0	0	0	0	0	0
novel_mir_130	6	0	0	0	0	0	0	0	0	0	0	0
novel_mir_154	6	0	0	0	0	0	0	0	0	0	0	0
novel_mir_18	6	0	0	0	0	0	0	0	0	0	0	0
novel_mir_19	6	0	0	0	0	0	0	0	0	0	0	0
novel_mir_64	6	0	0	0	0	0	0	0	0	0	0	0
novel_mir_72	6	0	0	0	0	0	0	0	0	0	0	0
novel_mir_56	5	11	9	14	0	8	0	10	7	15	0	15
novel_mir_58	5	0	0	13	7	18	6	0	0	0	0	0
novel_mir_128	5	0	0	5	0	0	0	0	0	0	8	0
novel_mir_11	5	0	0	0	14	0	15	8	6	0	13	0
novel_mir_59	5	0	0	0	0	9	0	0	0	0	0	0
novel_mir_107	5	0	0	0	0	0	0	0	16	0	0	9
novel_mir_53	5	0	0	0	0	0	0	0	0	32	0	0
novel_mir_10	5	0	0	0	0	0	0	0	0	0	0	0
novel_mir_41	5	0	0	0	0	0	0	0	0	0	0	0
novel_mir_68	5	0	0	0	0	0	0	0	0	0	0	0
novel_mir_8	5	0	0	0	0	0	0	0	0	0	0	0
novel_mir_88	5	0	0	0	0	0	0	0	0	0	0	0
novel_mir_255	0	21921	6613	0	0	0	10260	0	0	0	9821	17729
novel_mir_220	0	4186	0	0	0	2836	0	3196	0	3869	0	3537
novel_mir_214	0	881	0	0	0	0	0	0	0	0	0	0
novel_mir_235	0	214	32	0	0	0	83	0	78	0	0	0
novel_mir_236	0	208	0	15	311	130	0	0	48	0	0	67
novel_mir_232	0	199	0	319	0	176	159	0	0	0	212	398
novel_mir_260	0	183	0	197	150	0	292	269	162	0	0	139
novel_mir_183	0	120	25	0	41	0	0	70	57	97	55	148
novel_mir_265	0	102	111	69	125	139	108	101	81	0	95	66
novel_mir_219	0	42	0	0	0	72	70	0	66	0	100	0
novel_mir_225	0	42	0	0	0	0	0	16	20	25	0	0
novel_mir_256	0	39	13	0	0	0	25	0	9	0	0	0
novel_mir_173	0	36	0	36	0	28	21	0	31	0	62	0
novel_mir_175	0	31	53	14	0	65	0	0	0	0	0	0
novel_mir_247	0	30	0	0	0	0	0	0	48	0	0	79
novel_mir_257	0	29	0	0	35	26	0	19	0	20	0	31
novel_mir_264	0	26	0	0	0	0	0	0	0	0	0	0
novel_mir_198	0	22	10	0	7	0	0	0	0	0	0	0
novel_mir_227	0	22	0	53	0	0	0	0	0	0	0	0
novel_mir_202	0	20	0	0	0	0	0	0	6	18	0	0
novel_mir_234	0	19	0	28	24	9	0	21	18	18	0	16
novel_mir_226	0	19	0	13	15	15	0	14	20	15	11	16
novel_mir_250	0	18	11	0	0	0	0	0	0	13	0	0
novel_mir_230	0	17	16	5	0	0	0	0	0	5	0	10
novel_mir_263	0	17	0	0	0	0	0	0	0	0	0	30
novel_mir_200	0	16	0	12	0	13	7	0	0	0	11	0
novel_mir_253	0	16	0	0	6	6	17	0	0	8	14	14
novel_mir_192	0	15	0	0	13	9	0	8	0	21	6	8
novel_mir_252	0	15	0	0	0	0	6	0	10	27	0	16
novel_mir_258	0	14	15	26	0	0	8	0	0	26	10	12
novel_mir_199	0	14	0	0	0	0	0	0	0	0	0	0
novel_mir_243	0	14	0	0	0	0	0	0	0	0	0	0
novel_mir_212	0	13	0	0	0	9	0	0	0	0	0	0
novel_mir_204	0	13	0	0	0	0	0	0	9	7	12	0
novel_mir_228	0	13	0	0	0	0	0	0	0	14	0	0
novel_mir_205	0	12	9	11	0	10	6	7	0	16	8	14
novel_mir_254	0	12	7	25	0	22	13	19	21	53	7	26
novel_mir_223	0	12	0	15	8	14	6	0	7	0	8	13
novel_mir_242	0	12	0	9	8	8	0	0	10	26	14	11
novel_mir_240	0	12	0	0	0	0	7	0	0	0	0	0
novel_mir_176	0	12	0	0	0	0	5	5	0	0	0	8
novel_mir_172	0	12	0	0	0	0	0	0	0	6	0	0
novel_mir_174	0	12	0	0	0	0	0	0	0	0	0	0
novel_mir_224	0	11	6	0	12	23	0	6	9	9	0	12
novel_mir_267	0	10	19	0	17	13	18	0	19	16	0	9
novel_mir_185	0	10	6	16	6	0	11	5	9	11	0	13
novel_mir_217	0	10	5	0	0	5	0	7	0	11	0	7
novel_mir_231	0	10	0	7	0	0	0	5	0	16	0	10
novel_mir_193	0	10	0	0	6	0	0	7	0	0	0	0
novel_mir_206	0	10	0	0	0	0	11	0	0	0	0	0
novel_mir_233	0	10	0	0	0	0	0	6	7	5	0	5
novel_mir_244	0	10	0	0	0	0	0	0	0	5	5	7
novel_mir_180	0	9	0	0	0	0	0	0	0	13	0	0
novel_mir_201	0	9	0	0	0	0	0	0	0	0	10	0
novel_mir_179	0	9	0	0	0	0	0	0	0	0	0	0
novel_mir_181	0	9	0	0	0	0	0	0	0	0	0	0
novel_mir_211	0	9	0	0	0	0	0	0	0	0	0	0
novel_mir_266	0	8	17	23	0	0	0	0	11	13	15	10
novel_mir_269	0	8	14	0	0	0	10	0	0	0	0	0
novel_mir_197	0	8	11	7	7	0	6	0	6	11	9	13
novel_mir_221	0	8	9	7	9	8	20	6	9	5	0	7
novel_mir_182	0	8	0	7	0	0	0	9	0	6	0	16
novel_mir_184	0	8	0	0	9	9	11	8	0	7	0	8
novel_mir_191	0	8	0	0	5	0	0	0	0	0	0	0
novel_mir_237	0	7	0	7	5	5	5	0	5	11	8	8
novel_mir_239	0	7	0	0	0	8	6	6	0	13	6	0
novel_mir_262	0	7	0	0	0	0	0	6	0	0	0	10
novel_mir_194	0	7	0	0	0	0	0	0	0	14	0	0
novel_mir_222	0	7	0	0	0	0	0	0	0	0	0	5
novel_mir_178	0	7	0	0	0	0	0	0	0	0	0	0
novel_mir_189	0	7	0	0	0	0	0	0	0	0	0	0
novel_mir_268	0	7	0	0	0	0	0	0	0	0	0	0
novel_mir_210	0	6	9	7	7	12	19	11	7	11	0	12
novel_mir_249	0	6	0	18	0	0	14	0	0	0	0	0
novel_mir_261	0	6	0	18	0	0	0	0	10	0	10	0
novel_mir_213	0	6	0	9	0	0	0	0	9	7	0	0
novel_mir_177	0	6	0	6	0	0	0	0	0	0	0	0
novel_mir_207	0	6	0	0	8	0	6	0	10	8	0	0
novel_mir_209	0	6	0	0	6	7	0	9	7	0	18	6
novel_mir_195	0	6	0	0	0	5	0	6	6	26	5	20
novel_mir_241	0	6	0	0	0	0	0	0	0	0	6	0
novel_mir_203	0	6	0	0	0	0	0	0	0	0	0	0
novel_mir_238	0	6	0	0	0	0	0	0	0	0	0	0
novel_mir_248	0	6	0	0	0	0	0	0	0	0	0	0
novel_mir_251	0	6	0	0	0	0	0	0	0	0	0	0
novel_mir_270	0	5	15	0	11	0	16	6	14	0	0	0
novel_mir_259	0	5	7	0	0	0	7	8	0	0	0	0
novel_mir_186	0	5	0	9	0	6	0	0	0	0	0	0
novel_mir_208	0	5	0	0	0	14	11	12	0	14	9	17
novel_mir_190	0	5	0	0	0	0	8	0	0	0	0	0
novel_mir_196	0	5	0	0	0	0	0	0	0	0	9	0
novel_mir_215	0	5	0	0	0	0	0	0	0	0	0	9
novel_mir_216	0	5	0	0	0	0	0	0	0	0	0	8
novel_mir_188	0	5	0	0	0	0	0	0	0	0	0	6
novel_mir_187	0	5	0	0	0	0	0	0	0	0	0	0
novel_mir_218	0	5	0	0	0	0	0	0	0	0	0	0
novel_mir_229	0	5	0	0	0	0	0	0	0	0	0	0
novel_mir_245	0	5	0	0	0	0	0	0	0	0	0	0
novel_mir_246	0	5	0	0	0	0	0	0	0	0	0	0
novel_mir_326	0	0	3060	3878	4192	5376	3721	0	3791	0	0	0
novel_mir_300	0	0	1574	0	0	0	0	775	0	820	0	0
novel_mir_299	0	0	192	0	0	0	0	0	0	0	0	0
novel_mir_327	0	0	152	55	47	7	106	0	60	9	17	0
novel_mir_273	0	0	36	22	32	35	54	14	36	28	36	54
novel_mir_311	0	0	35	0	0	0	0	0	0	37	0	18
novel_mir_303	0	0	35	0	0	0	0	0	0	0	0	0
novel_mir_330	0	0	34	5	11	15	24	13	22	7	5	6
novel_mir_313	0	0	31	0	0	0	0	242	0	221	74	0
novel_mir_278	0	0	21	0	0	0	15	0	0	0	0	0
novel_mir_274	0	0	18	20	38	24	11	16	16	13	7	0
novel_mir_322	0	0	16	0	0	0	0	0	0	0	0	0
novel_mir_325	0	0	15	0	0	0	0	0	0	0	0	0
novel_mir_296	0	0	13	0	0	0	0	36	0	0	0	0
novel_mir_323	0	0	12	0	5	15	10	19	5	26	0	0
novel_mir_276	0	0	12	0	0	0	0	0	0	0	0	0
novel_mir_315	0	0	11	7	0	0	0	0	0	0	0	0
novel_mir_286	0	0	9	6	0	0	0	0	9	10	8	0
novel_mir_308	0	0	9	0	29	44	36	44	23	126	39	102
novel_mir_318	0	0	9	0	0	13	0	0	0	0	0	0
novel_mir_328	0	0	9	0	0	8	0	0	5	0	0	0
novel_mir_301	0	0	9	0	0	0	0	0	0	0	0	0
novel_mir_312	0	0	9	0	0	0	0	0	0	0	0	0
novel_mir_321	0	0	8	0	0	0	0	0	0	0	0	0
novel_mir_293	0	0	7	0	0	0	0	0	17	0	0	0
novel_mir_319	0	0	7	0	0	0	0	0	0	0	5	9
novel_mir_280	0	0	7	0	0	0	0	0	0	0	0	7
novel_mir_298	0	0	7	0	0	0	0	0	0	0	0	0
novel_mir_317	0	0	7	0	0	0	0	0	0	0	0	0
novel_mir_306	0	0	6	6	0	9	0	7	0	5	8	7
novel_mir_320	0	0	6	0	7	15	0	5	6	5	0	0
novel_mir_294	0	0	6	0	6	0	6	7	8	0	0	0
novel_mir_272	0	0	6	0	5	0	0	0	0	0	5	0
novel_mir_282	0	0	6	0	0	0	0	9	11	15	14	19
novel_mir_291	0	0	6	0	0	0	0	0	0	0	9	0
novel_mir_275	0	0	6	0	0	0	0	0	0	0	0	0
novel_mir_281	0	0	6	0	0	0	0	0	0	0	0	0
novel_mir_297	0	0	6	0	0	0	0	0	0	0	0	0
novel_mir_304	0	0	6	0	0	0	0	0	0	0	0	0
novel_mir_310	0	0	6	0	0	0	0	0	0	0	0	0
novel_mir_329	0	0	6	0	0	0	0	0	0	0	0	0
novel_mir_314	0	0	5	8	0	0	0	7	0	0	6	0
novel_mir_271	0	0	5	6	10	14	0	5	0	13	9	0
novel_mir_285	0	0	5	5	0	0	5	0	0	0	8	0
novel_mir_316	0	0	5	0	11	0	5	0	0	0	0	0
novel_mir_287	0	0	5	0	5	0	0	0	0	11	0	0
novel_mir_302	0	0	5	0	0	9	0	0	0	10	7	0
novel_mir_279	0	0	5	0	0	9	0	0	0	0	0	0
novel_mir_277	0	0	5	0	0	7	0	10	0	23	8	31
novel_mir_309	0	0	5	0	0	0	0	0	6	0	0	0
novel_mir_283	0	0	5	0	0	0	0	0	0	0	0	0
novel_mir_284	0	0	5	0	0	0	0	0	0	0	0	0
novel_mir_288	0	0	5	0	0	0	0	0	0	0	0	0
novel_mir_289	0	0	5	0	0	0	0	0	0	0	0	0
novel_mir_290	0	0	5	0	0	0	0	0	0	0	0	0
novel_mir_292	0	0	5	0	0	0	0	0	0	0	0	0
novel_mir_295	0	0	5	0	0	0	0	0	0	0	0	0
novel_mir_305	0	0	5	0	0	0	0	0	0	0	0	0
novel_mir_307	0	0	5	0	0	0	0	0	0	0	0	0
novel_mir_324	0	0	5	0	0	0	0	0	0	0	0	0
novel_mir_363	0	0	0	836	0	0	0	0	0	586	317	612
novel_mir_359	0	0	0	562	0	0	0	401	335	0	603	0
novel_mir_349	0	0	0	95	0	0	0	0	0	0	113	89
novel_mir_375	0	0	0	62	0	48	0	79	0	118	37	0
novel_mir_360	0	0	0	53	0	0	0	0	62	64	0	48
novel_mir_383	0	0	0	29	0	0	0	0	0	0	0	0
novel_mir_340	0	0	0	28	0	0	51	62	0	31	0	48
novel_mir_350	0	0	0	28	0	0	0	0	0	0	0	14
novel_mir_361	0	0	0	27	0	0	0	0	0	0	0	18
novel_mir_381	0	0	0	26	0	0	0	0	0	0	7	19
novel_mir_386	0	0	0	20	0	0	21	6	0	0	0	0
novel_mir_382	0	0	0	18	0	0	0	0	0	0	0	0
novel_mir_356	0	0	0	16	7	0	0	5	7	10	0	0
novel_mir_343	0	0	0	16	0	0	6	0	0	0	0	16
novel_mir_338	0	0	0	15	0	0	0	8	0	6	14	13
novel_mir_370	0	0	0	14	0	0	0	0	0	320	0	0
novel_mir_362	0	0	0	14	0	0	0	0	0	0	0	0
novel_mir_376	0	0	0	13	0	0	0	8	14	0	0	9
novel_mir_355	0	0	0	13	0	0	0	0	0	0	0	0
novel_mir_367	0	0	0	12	0	0	0	0	0	0	0	0
novel_mir_377	0	0	0	12	0	0	0	0	0	0	0	0
novel_mir_354	0	0	0	11	11	9	0	0	5	0	0	8
novel_mir_384	0	0	0	11	0	0	0	0	0	0	0	11
novel_mir_344	0	0	0	10	0	5	6	0	11	0	20	7
novel_mir_336	0	0	0	10	0	0	0	5	0	6	9	8
novel_mir_369	0	0	0	10	0	0	0	0	0	0	0	6
novel_mir_339	0	0	0	10	0	0	0	0	0	0	0	0
novel_mir_341	0	0	0	10	0	0	0	0	0	0	0	0
novel_mir_347	0	0	0	10	0	0	0	0	0	0	0	0
novel_mir_364	0	0	0	10	0	0	0	0	0	0	0	0
novel_mir_365	0	0	0	9	0	0	0	0	0	0	0	0
novel_mir_346	0	0	0	8	5	0	0	0	0	6	0	0
novel_mir_334	0	0	0	8	0	0	0	0	0	0	0	0
novel_mir_372	0	0	0	8	0	0	0	0	0	0	0	0
novel_mir_374	0	0	0	7	8	0	0	0	0	8	0	0
novel_mir_337	0	0	0	7	0	7	0	0	0	7	0	9
novel_mir_342	0	0	0	7	0	0	0	0	0	10	12	0
novel_mir_358	0	0	0	7	0	0	0	0	0	0	0	5
novel_mir_345	0	0	0	7	0	0	0	0	0	0	0	0
novel_mir_368	0	0	0	6	0	5	0	0	5	5	8	0
novel_mir_352	0	0	0	6	0	5	0	0	0	0	5	0
novel_mir_366	0	0	0	6	0	5	0	0	0	0	0	0
novel_mir_380	0	0	0	6	0	0	0	0	0	5	0	0
novel_mir_373	0	0	0	6	0	0	0	0	0	0	0	10
novel_mir_335	0	0	0	6	0	0	0	0	0	0	0	0
novel_mir_353	0	0	0	6	0	0	0	0	0	0	0	0
novel_mir_357	0	0	0	6	0	0	0	0	0	0	0	0
novel_mir_378	0	0	0	5	0	7	11	0	7	7	18	0
novel_mir_332	0	0	0	5	0	0	5	0	5	0	0	0
novel_mir_371	0	0	0	5	0	0	0	0	0	0	10	9
novel_mir_348	0	0	0	5	0	0	0	0	0	0	9	0
novel_mir_351	0	0	0	5	0	0	0	0	0	0	0	5
novel_mir_331	0	0	0	5	0	0	0	0	0	0	0	0
novel_mir_333	0	0	0	5	0	0	0	0	0	0	0	0
novel_mir_379	0	0	0	5	0	0	0	0	0	0	0	0
novel_mir_385	0	0	0	5	0	0	0	0	0	0	0	0
novel_mir_394	0	0	0	0	544	0	279	226	0	159	406	268
novel_mir_405	0	0	0	0	263	0	242	0	0	0	0	0
novel_mir_412	0	0	0	0	46	0	0	13	0	0	0	0
novel_mir_402	0	0	0	0	42	0	0	0	49	130	0	0
novel_mir_407	0	0	0	0	14	0	0	0	0	0	0	0
novel_mir_414	0	0	0	0	13	0	0	0	0	0	0	0
novel_mir_401	0	0	0	0	10	10	9	0	0	0	5	8
novel_mir_416	0	0	0	0	10	6	11	0	0	0	0	8
novel_mir_408	0	0	0	0	10	0	0	0	0	0	0	0
novel_mir_417	0	0	0	0	10	0	0	0	0	0	0	0
novel_mir_424	0	0	0	0	10	0	0	0	0	0	0	0
novel_mir_425	0	0	0	0	9	6	0	8	11	0	0	0
novel_mir_392	0	0	0	0	9	0	0	0	14	0	0	0
novel_mir_396	0	0	0	0	9	0	0	0	0	0	0	0
novel_mir_415	0	0	0	0	9	0	0	0	0	0	0	0
novel_mir_422	0	0	0	0	8	9	0	0	0	0	0	0
novel_mir_387	0	0	0	0	8	5	0	6	0	0	0	0
novel_mir_406	0	0	0	0	8	5	0	0	0	5	0	0
novel_mir_426	0	0	0	0	8	0	0	0	0	11	0	0
novel_mir_413	0	0	0	0	8	0	0	0	0	0	0	0
novel_mir_409	0	0	0	0	7	0	0	0	13	0	10	8
novel_mir_423	0	0	0	0	7	0	0	0	0	0	0	34
novel_mir_389	0	0	0	0	7	0	0	0	0	0	0	0
novel_mir_393	0	0	0	0	7	0	0	0	0	0	0	0
novel_mir_398	0	0	0	0	7	0	0	0	0	0	0	0
novel_mir_399	0	0	0	0	7	0	0	0	0	0	0	0
novel_mir_410	0	0	0	0	6	15	0	0	0	0	56	0
novel_mir_403	0	0	0	0	6	0	0	0	0	0	0	0
novel_mir_418	0	0	0	0	6	0	0	0	0	0	0	0
novel_mir_420	0	0	0	0	6	0	0	0	0	0	0	0
novel_mir_404	0	0	0	0	5	6	0	0	0	0	0	0
novel_mir_419	0	0	0	0	5	0	0	0	7	0	5	0
novel_mir_427	0	0	0	0	5	0	0	0	7	0	0	0
novel_mir_428	0	0	0	0	5	0	0	0	7	0	0	0
novel_mir_421	0	0	0	0	5	0	0	0	0	0	8	0
novel_mir_388	0	0	0	0	5	0	0	0	0	0	0	0
novel_mir_390	0	0	0	0	5	0	0	0	0	0	0	0
novel_mir_391	0	0	0	0	5	0	0	0	0	0	0	0
novel_mir_395	0	0	0	0	5	0	0	0	0	0	0	0
novel_mir_397	0	0	0	0	5	0	0	0	0	0	0	0
novel_mir_400	0	0	0	0	5	0	0	0	0	0	0	0
novel_mir_411	0	0	0	0	5	0	0	0	0	0	0	0
novel_mir_473	0	0	0	0	0	301	0	0	0	0	0	0
novel_mir_448	0	0	0	0	0	64	52	91	0	0	93	127
novel_mir_463	0	0	0	0	0	30	0	0	0	18	0	0
novel_mir_433	0	0	0	0	0	28	0	0	0	0	0	0
novel_mir_435	0	0	0	0	0	20	0	0	0	0	0	0
novel_mir_447	0	0	0	0	0	19	0	0	0	0	0	0
novel_mir_474	0	0	0	0	0	19	0	0	0	0	0	0
novel_mir_476	0	0	0	0	0	15	0	0	0	0	0	0
novel_mir_432	0	0	0	0	0	13	0	91	0	0	146	0
novel_mir_437	0	0	0	0	0	12	9	22	9	6	0	0
novel_mir_430	0	0	0	0	0	11	0	0	0	0	0	11
novel_mir_438	0	0	0	0	0	10	0	13	0	19	22	0
novel_mir_440	0	0	0	0	0	10	0	0	0	0	0	0
novel_mir_475	0	0	0	0	0	10	0	0	0	0	0	0
novel_mir_457	0	0	0	0	0	9	0	0	0	8	0	6
novel_mir_431	0	0	0	0	0	9	0	0	0	0	0	0
novel_mir_436	0	0	0	0	0	9	0	0	0	0	0	0
novel_mir_468	0	0	0	0	0	9	0	0	0	0	0	0
novel_mir_472	0	0	0	0	0	9	0	0	0	0	0	0
novel_mir_439	0	0	0	0	0	8	7	0	0	0	0	0
novel_mir_469	0	0	0	0	0	8	6	0	7	0	0	0
novel_mir_462	0	0	0	0	0	8	0	0	0	8	9	0
novel_mir_442	0	0	0	0	0	8	0	0	0	0	0	0
novel_mir_452	0	0	0	0	0	7	7	9	0	13	0	0
novel_mir_451	0	0	0	0	0	7	0	0	0	0	10	0
novel_mir_464	0	0	0	0	0	7	0	0	0	0	0	12
novel_mir_446	0	0	0	0	0	7	0	0	0	0	0	0
novel_mir_456	0	0	0	0	0	7	0	0	0	0	0	0
novel_mir_450	0	0	0	0	0	6	0	0	6	0	8	0
novel_mir_454	0	0	0	0	0	6	0	0	0	14	0	0
novel_mir_467	0	0	0	0	0	6	0	0	0	6	0	0
novel_mir_458	0	0	0	0	0	6	0	0	0	5	0	0
novel_mir_429	0	0	0	0	0	6	0	0	0	0	0	0
novel_mir_441	0	0	0	0	0	6	0	0	0	0	0	0
novel_mir_445	0	0	0	0	0	6	0	0	0	0	0	0
novel_mir_449	0	0	0	0	0	6	0	0	0	0	0	0
novel_mir_455	0	0	0	0	0	6	0	0	0	0	0	0
novel_mir_459	0	0	0	0	0	6	0	0	0	0	0	0
novel_mir_465	0	0	0	0	0	6	0	0	0	0	0	0
novel_mir_443	0	0	0	0	0	5	6	0	0	0	0	0
novel_mir_453	0	0	0	0	0	5	5	0	0	0	0	5
novel_mir_470	0	0	0	0	0	5	0	9	0	0	0	0
novel_mir_466	0	0	0	0	0	5	0	6	0	0	0	0
novel_mir_434	0	0	0	0	0	5	0	0	0	0	0	0
novel_mir_444	0	0	0	0	0	5	0	0	0	0	0	0
novel_mir_460	0	0	0	0	0	5	0	0	0	0	0	0
novel_mir_461	0	0	0	0	0	5	0	0	0	0	0	0
novel_mir_471	0	0	0	0	0	5	0	0	0	0	0	0
novel_mir_512	0	0	0	0	0	0	91	0	0	0	0	0
novel_mir_501	0	0	0	0	0	0	40	25	0	0	0	0
novel_mir_509	0	0	0	0	0	0	31	0	0	0	0	0
novel_mir_506	0	0	0	0	0	0	23	0	0	0	0	0
novel_mir_502	0	0	0	0	0	0	22	0	0	0	0	0
novel_mir_495	0	0	0	0	0	0	15	0	0	0	0	0
novel_mir_504	0	0	0	0	0	0	15	0	0	0	0	0
novel_mir_499	0	0	0	0	0	0	14	0	0	0	0	58
novel_mir_503	0	0	0	0	0	0	12	0	0	0	8	0
novel_mir_486	0	0	0	0	0	0	12	0	0	0	0	0
novel_mir_507	0	0	0	0	0	0	9	8	0	0	0	0
novel_mir_488	0	0	0	0	0	0	9	0	0	0	0	0
novel_mir_493	0	0	0	0	0	0	9	0	0	0	0	0
novel_mir_494	0	0	0	0	0	0	8	0	6	7	11	6
novel_mir_487	0	0	0	0	0	0	8	0	0	0	0	0
novel_mir_496	0	0	0	0	0	0	8	0	0	0	0	0
novel_mir_508	0	0	0	0	0	0	8	0	0	0	0	0
novel_mir_489	0	0	0	0	0	0	7	0	8	10	11	0
novel_mir_490	0	0	0	0	0	0	7	0	0	0	0	0
novel_mir_492	0	0	0	0	0	0	7	0	0	0	0	0
novel_mir_510	0	0	0	0	0	0	6	0	0	13	0	6
novel_mir_483	0	0	0	0	0	0	6	0	0	5	0	0
novel_mir_478	0	0	0	0	0	0	6	0	0	0	0	0
novel_mir_497	0	0	0	0	0	0	6	0	0	0	0	0
novel_mir_505	0	0	0	0	0	0	6	0	0	0	0	0
novel_mir_513	0	0	0	0	0	0	6	0	0	0	0	0
novel_mir_477	0	0	0	0	0	0	5	0	0	0	0	0
novel_mir_479	0	0	0	0	0	0	5	0	0	0	0	0
novel_mir_480	0	0	0	0	0	0	5	0	0	0	0	0
novel_mir_481	0	0	0	0	0	0	5	0	0	0	0	0
novel_mir_482	0	0	0	0	0	0	5	0	0	0	0	0
novel_mir_484	0	0	0	0	0	0	5	0	0	0	0	0
novel_mir_485	0	0	0	0	0	0	5	0	0	0	0	0
novel_mir_491	0	0	0	0	0	0	5	0	0	0	0	0
novel_mir_498	0	0	0	0	0	0	5	0	0	0	0	0
novel_mir_500	0	0	0	0	0	0	5	0	0	0	0	0
novel_mir_511	0	0	0	0	0	0	5	0	0	0	0	0
novel_mir_514	0	0	0	0	0	0	5	0	0	0	0	0
novel_mir_528	0	0	0	0	0	0	0	1090	0	0	904	0
novel_mir_529	0	0	0	0	0	0	0	19	0	24	0	0
novel_mir_527	0	0	0	0	0	0	0	18	0	0	0	0
novel_mir_524	0	0	0	0	0	0	0	12	0	0	20	0
novel_mir_543	0	0	0	0	0	0	0	12	0	0	0	17
novel_mir_532	0	0	0	0	0	0	0	11	0	0	0	0
novel_mir_539	0	0	0	0	0	0	0	10	0	0	0	0
novel_mir_540	0	0	0	0	0	0	0	10	0	0	0	0
novel_mir_519	0	0	0	0	0	0	0	9	0	0	0	0
novel_mir_538	0	0	0	0	0	0	0	9	0	0	0	0
novel_mir_518	0	0	0	0	0	0	0	8	7	0	0	0
novel_mir_516	0	0	0	0	0	0	0	8	0	0	0	0
novel_mir_517	0	0	0	0	0	0	0	8	0	0	0	0
novel_mir_521	0	0	0	0	0	0	0	8	0	0	0	0
novel_mir_522	0	0	0	0	0	0	0	8	0	0	0	0
novel_mir_542	0	0	0	0	0	0	0	7	8	0	0	0
novel_mir_537	0	0	0	0	0	0	0	6	0	21	0	0
novel_mir_525	0	0	0	0	0	0	0	6	0	0	0	0
novel_mir_534	0	0	0	0	0	0	0	6	0	0	0	0
novel_mir_535	0	0	0	0	0	0	0	6	0	0	0	0
novel_mir_536	0	0	0	0	0	0	0	6	0	0	0	0
novel_mir_515	0	0	0	0	0	0	0	5	0	0	0	0
novel_mir_520	0	0	0	0	0	0	0	5	0	0	0	0
novel_mir_523	0	0	0	0	0	0	0	5	0	0	0	0
novel_mir_526	0	0	0	0	0	0	0	5	0	0	0	0
novel_mir_530	0	0	0	0	0	0	0	5	0	0	0	0
novel_mir_531	0	0	0	0	0	0	0	5	0	0	0	0
novel_mir_533	0	0	0	0	0	0	0	5	0	0	0	0
novel_mir_541	0	0	0	0	0	0	0	5	0	0	0	0
novel_mir_568	0	0	0	0	0	0	0	0	226	0	633	0
novel_mir_556	0	0	0	0	0	0	0	0	16	0	21	20
novel_mir_555	0	0	0	0	0	0	0	0	9	10	6	11
novel_mir_573	0	0	0	0	0	0	0	0	9	0	6	5
novel_mir_567	0	0	0	0	0	0	0	0	9	0	5	0
novel_mir_575	0	0	0	0	0	0	0	0	9	0	0	6
novel_mir_551	0	0	0	0	0	0	0	0	8	0	0	0
novel_mir_569	0	0	0	0	0	0	0	0	8	0	0	0
novel_mir_549	0	0	0	0	0	0	0	0	7	0	0	0
novel_mir_550	0	0	0	0	0	0	0	0	7	0	0	0
novel_mir_557	0	0	0	0	0	0	0	0	7	0	0	0
novel_mir_559	0	0	0	0	0	0	0	0	7	0	0	0
novel_mir_565	0	0	0	0	0	0	0	0	7	0	0	0
novel_mir_548	0	0	0	0	0	0	0	0	6	0	0	0
novel_mir_558	0	0	0	0	0	0	0	0	6	0	0	0
novel_mir_562	0	0	0	0	0	0	0	0	6	0	0	0
novel_mir_564	0	0	0	0	0	0	0	0	6	0	0	0
novel_mir_572	0	0	0	0	0	0	0	0	6	0	0	0
novel_mir_544	0	0	0	0	0	0	0	0	5	17	0	0
novel_mir_554	0	0	0	0	0	0	0	0	5	0	0	5
novel_mir_545	0	0	0	0	0	0	0	0	5	0	0	0
novel_mir_546	0	0	0	0	0	0	0	0	5	0	0	0
novel_mir_547	0	0	0	0	0	0	0	0	5	0	0	0
novel_mir_552	0	0	0	0	0	0	0	0	5	0	0	0
novel_mir_553	0	0	0	0	0	0	0	0	5	0	0	0
novel_mir_560	0	0	0	0	0	0	0	0	5	0	0	0
novel_mir_561	0	0	0	0	0	0	0	0	5	0	0	0
novel_mir_563	0	0	0	0	0	0	0	0	5	0	0	0
novel_mir_566	0	0	0	0	0	0	0	0	5	0	0	0
novel_mir_570	0	0	0	0	0	0	0	0	5	0	0	0
novel_mir_571	0	0	0	0	0	0	0	0	5	0	0	0
novel_mir_574	0	0	0	0	0	0	0	0	5	0	0	0
novel_mir_576	0	0	0	0	0	0	0	0	5	0	0	0
novel_mir_618	0	0	0	0	0	0	0	0	0	5032	4701	0
novel_mir_597	0	0	0	0	0	0	0	0	0	36	0	0
novel_mir_578	0	0	0	0	0	0	0	0	0	26	0	18
novel_mir_619	0	0	0	0	0	0	0	0	0	16	0	0
novel_mir_585	0	0	0	0	0	0	0	0	0	13	0	0
novel_mir_590	0	0	0	0	0	0	0	0	0	12	0	0
novel_mir_602	0	0	0	0	0	0	0	0	0	12	0	0
novel_mir_600	0	0	0	0	0	0	0	0	0	11	0	0
novel_mir_607	0	0	0	0	0	0	0	0	0	9	6	14
novel_mir_608	0	0	0	0	0	0	0	0	0	9	6	0
novel_mir_589	0	0	0	0	0	0	0	0	0	9	0	0
novel_mir_601	0	0	0	0	0	0	0	0	0	9	0	0
novel_mir_611	0	0	0	0	0	0	0	0	0	9	0	0
novel_mir_613	0	0	0	0	0	0	0	0	0	9	0	0
novel_mir_616	0	0	0	0	0	0	0	0	0	9	0	0
novel_mir_579	0	0	0	0	0	0	0	0	0	8	0	0
novel_mir_581	0	0	0	0	0	0	0	0	0	8	0	0
novel_mir_592	0	0	0	0	0	0	0	0	0	8	0	0
novel_mir_595	0	0	0	0	0	0	0	0	0	8	0	0
novel_mir_609	0	0	0	0	0	0	0	0	0	8	0	0
novel_mir_584	0	0	0	0	0	0	0	0	0	7	0	0
novel_mir_588	0	0	0	0	0	0	0	0	0	7	0	0
novel_mir_593	0	0	0	0	0	0	0	0	0	7	0	0
novel_mir_605	0	0	0	0	0	0	0	0	0	7	0	0
novel_mir_610	0	0	0	0	0	0	0	0	0	7	0	0
novel_mir_612	0	0	0	0	0	0	0	0	0	7	0	0
novel_mir_596	0	0	0	0	0	0	0	0	0	6	0	9
novel_mir_582	0	0	0	0	0	0	0	0	0	6	0	0
novel_mir_583	0	0	0	0	0	0	0	0	0	6	0	0
novel_mir_586	0	0	0	0	0	0	0	0	0	6	0	0
novel_mir_591	0	0	0	0	0	0	0	0	0	6	0	0
novel_mir_604	0	0	0	0	0	0	0	0	0	6	0	0
novel_mir_606	0	0	0	0	0	0	0	0	0	6	0	0
novel_mir_614	0	0	0	0	0	0	0	0	0	5	0	18
novel_mir_587	0	0	0	0	0	0	0	0	0	5	0	8
novel_mir_577	0	0	0	0	0	0	0	0	0	5	0	0
novel_mir_580	0	0	0	0	0	0	0	0	0	5	0	0
novel_mir_594	0	0	0	0	0	0	0	0	0	5	0	0
novel_mir_598	0	0	0	0	0	0	0	0	0	5	0	0
novel_mir_599	0	0	0	0	0	0	0	0	0	5	0	0
novel_mir_603	0	0	0	0	0	0	0	0	0	5	0	0
novel_mir_615	0	0	0	0	0	0	0	0	0	5	0	0
novel_mir_617	0	0	0	0	0	0	0	0	0	5	0	0
novel_mir_666	0	0	0	0	0	0	0	0	0	0	27	0
novel_mir_623	0	0	0	0	0	0	0	0	0	0	20	0
novel_mir_637	0	0	0	0	0	0	0	0	0	0	20	0
novel_mir_625	0	0	0	0	0	0	0	0	0	0	15	0
novel_mir_665	0	0	0	0	0	0	0	0	0	0	15	0
novel_mir_664	0	0	0	0	0	0	0	0	0	0	14	0
novel_mir_647	0	0	0	0	0	0	0	0	0	0	13	0
novel_mir_621	0	0	0	0	0	0	0	0	0	0	12	0
novel_mir_649	0	0	0	0	0	0	0	0	0	0	10	0
novel_mir_624	0	0	0	0	0	0	0	0	0	0	8	0
novel_mir_635	0	0	0	0	0	0	0	0	0	0	8	0
novel_mir_636	0	0	0	0	0	0	0	0	0	0	8	0
novel_mir_644	0	0	0	0	0	0	0	0	0	0	8	0
novel_mir_646	0	0	0	0	0	0	0	0	0	0	8	0
novel_mir_663	0	0	0	0	0	0	0	0	0	0	8	0
novel_mir_660	0	0	0	0	0	0	0	0	0	0	7	7
novel_mir_645	0	0	0	0	0	0	0	0	0	0	7	6
novel_mir_650	0	0	0	0	0	0	0	0	0	0	7	0
novel_mir_628	0	0	0	0	0	0	0	0	0	0	6	0
novel_mir_630	0	0	0	0	0	0	0	0	0	0	6	0
novel_mir_631	0	0	0	0	0	0	0	0	0	0	6	0
novel_mir_633	0	0	0	0	0	0	0	0	0	0	6	0
novel_mir_634	0	0	0	0	0	0	0	0	0	0	6	0
novel_mir_640	0	0	0	0	0	0	0	0	0	0	6	0
novel_mir_651	0	0	0	0	0	0	0	0	0	0	6	0
novel_mir_655	0	0	0	0	0	0	0	0	0	0	6	0
novel_mir_657	0	0	0	0	0	0	0	0	0	0	6	0
novel_mir_658	0	0	0	0	0	0	0	0	0	0	6	0
novel_mir_656	0	0	0	0	0	0	0	0	0	0	5	13
novel_mir_654	0	0	0	0	0	0	0	0	0	0	5	7
novel_mir_639	0	0	0	0	0	0	0	0	0	0	5	5
novel_mir_620	0	0	0	0	0	0	0	0	0	0	5	0
novel_mir_622	0	0	0	0	0	0	0	0	0	0	5	0
novel_mir_626	0	0	0	0	0	0	0	0	0	0	5	0
novel_mir_627	0	0	0	0	0	0	0	0	0	0	5	0
novel_mir_629	0	0	0	0	0	0	0	0	0	0	5	0
novel_mir_632	0	0	0	0	0	0	0	0	0	0	5	0
novel_mir_638	0	0	0	0	0	0	0	0	0	0	5	0
novel_mir_641	0	0	0	0	0	0	0	0	0	0	5	0
novel_mir_642	0	0	0	0	0	0	0	0	0	0	5	0
novel_mir_643	0	0	0	0	0	0	0	0	0	0	5	0
novel_mir_648	0	0	0	0	0	0	0	0	0	0	5	0
novel_mir_652	0	0	0	0	0	0	0	0	0	0	5	0
novel_mir_653	0	0	0	0	0	0	0	0	0	0	5	0
novel_mir_659	0	0	0	0	0	0	0	0	0	0	5	0
novel_mir_661	0	0	0	0	0	0	0	0	0	0	5	0
novel_mir_662	0	0	0	0	0	0	0	0	0	0	5	0
novel_mir_688	0	0	0	0	0	0	0	0	0	0	0	20
novel_mir_672	0	0	0	0	0	0	0	0	0	0	0	17
novel_mir_697	0	0	0	0	0	0	0	0	0	0	0	17
novel_mir_678	0	0	0	0	0	0	0	0	0	0	0	14
novel_mir_698	0	0	0	0	0	0	0	0	0	0	0	11
novel_mir_707	0	0	0	0	0	0	0	0	0	0	0	11
novel_mir_676	0	0	0	0	0	0	0	0	0	0	0	10
novel_mir_681	0	0	0	0	0	0	0	0	0	0	0	10
novel_mir_682	0	0	0	0	0	0	0	0	0	0	0	10
novel_mir_695	0	0	0	0	0	0	0	0	0	0	0	10
novel_mir_669	0	0	0	0	0	0	0	0	0	0	0	9
novel_mir_687	0	0	0	0	0	0	0	0	0	0	0	9
novel_mir_693	0	0	0	0	0	0	0	0	0	0	0	9
novel_mir_702	0	0	0	0	0	0	0	0	0	0	0	9
novel_mir_668	0	0	0	0	0	0	0	0	0	0	0	8
novel_mir_673	0	0	0	0	0	0	0	0	0	0	0	8
novel_mir_696	0	0	0	0	0	0	0	0	0	0	0	8
novel_mir_667	0	0	0	0	0	0	0	0	0	0	0	7
novel_mir_679	0	0	0	0	0	0	0	0	0	0	0	7
novel_mir_680	0	0	0	0	0	0	0	0	0	0	0	7
novel_mir_683	0	0	0	0	0	0	0	0	0	0	0	7
novel_mir_703	0	0	0	0	0	0	0	0	0	0	0	7
novel_mir_704	0	0	0	0	0	0	0	0	0	0	0	7
novel_mir_705	0	0	0	0	0	0	0	0	0	0	0	7
novel_mir_674	0	0	0	0	0	0	0	0	0	0	0	6
novel_mir_689	0	0	0	0	0	0	0	0	0	0	0	6
novel_mir_692	0	0	0	0	0	0	0	0	0	0	0	6
novel_mir_708	0	0	0	0	0	0	0	0	0	0	0	6
novel_mir_670	0	0	0	0	0	0	0	0	0	0	0	5
novel_mir_671	0	0	0	0	0	0	0	0	0	0	0	5
novel_mir_675	0	0	0	0	0	0	0	0	0	0	0	5
novel_mir_677	0	0	0	0	0	0	0	0	0	0	0	5
novel_mir_684	0	0	0	0	0	0	0	0	0	0	0	5
novel_mir_685	0	0	0	0	0	0	0	0	0	0	0	5
novel_mir_686	0	0	0	0	0	0	0	0	0	0	0	5
novel_mir_690	0	0	0	0	0	0	0	0	0	0	0	5
novel_mir_691	0	0	0	0	0	0	0	0	0	0	0	5
novel_mir_694	0	0	0	0	0	0	0	0	0	0	0	5
novel_mir_699	0	0	0	0	0	0	0	0	0	0	0	5
novel_mir_700	0	0	0	0	0	0	0	0	0	0	0	5
novel_mir_701	0	0	0	0	0	0	0	0	0	0	0	5
novel_mir_706	0	0	0	0	0	0	0	0	0	0	0	5

## Sheet: Table S4
Table S4.MRNA differentially expressed in backfat tissue
GeneID	Length	AF-Expression	BF-Expression	log2FoldChange(BF/AF)	Pvalue	Padj	Up/Down-Regulation(BF/AF)	Description	Pathway	GO Component	GO Function	GO Process	Blast nr
ENSSSCG00000031648	4846	680.066	113.813	-1.39813	2.29e-05	0.0100818	Down	WISP2	ko05200//Pathways in cancer;ko04151//PI3K-Akt signaling pathway;ko04015//Rap1 signaling pathway;ko04810//Regulation of actin cytoskeleton;ko04514//Cell adhesion molecules (CAMs);ko05205//Proteoglycans in cancer;ko04145//Phagosome;ko04510//Focal adhesion;ko04360//Axon guidance;ko05414//Dilated cardiomyopathy;ko04670//Leukocyte transendothelial migration;ko04611//Platelet activation;ko05206//MicroR…	GO:0005578//proteinaceous extracellular matrix;GO:0005615//extracellular space;GO:0070062//extracellular exosome	GO:0005178//integrin binding;GO:0005520//insulin-like growth factor binding;GO:0008201//heparin binding	GO:0001558//regulation of cell growth;GO:0007155//cell adhesion;GO:0007165//signal transduction;GO:0007267//cell-cell signaling;GO:0060548//negative regulation of cell death	gi|311274896|ref|XP_003134500.1|/9.3482e-170/PREDICTED: WNT1-inducible-signaling pathway protein 2 [Sus scrofa]//gi|311274896|ref|XP_003134500.1|/9.3482e-170/PREDICTED: WNT1-inducible-signaling pathway protein 2 [Sus scrofa]
ENSSSCG00000022945	1575	79.1996	310.586	1.22291	5.96e-05	0.0204722	Up	UCHL1	ko05012//Parkinson's disease	GO:0005654//nucleoplasm;GO:0005789//endoplasmic reticulum membrane;GO:0005829//cytosol;GO:0005886//plasma membrane;GO:0043025//neuronal cell body;GO:0043209//myelin sheath;GO:0044306//neuron projection terminus;GO:0070062//extracellular exosome;GO:1904115//axon cytoplasm	GO:0004197//cysteine-type endopeptidase activity;GO:0004843//thiol-dependent ubiquitin-specific protease activity;GO:0008242//omega peptidase activity;GO:0016874//ligase activity;GO:0031625//ubiquitin protein ligase binding;GO:0031694//alpha-2A adrenergic receptor binding;GO:0043130//ubiquitin binding	GO:0002931//response to ischemia;GO:0006511//ubiquitin-dependent protein catabolic process;GO:0007412//axon target recognition;GO:0007628//adult walking behavior;GO:0008283//cell proliferation;GO:0016579//protein deubiquitination;GO:0019896//axon transport of mitochondrion;GO:0042755//eating behavior;GO:0043407//negative regulation of MAP kinase activity;GO:0048747//muscle fiber development;GO:00…	gi|47523318|ref|NP_998928.1|/1.86888e-149/ubiquitin carboxyl-terminal hydrolase isozyme L1 [Sus scrofa]
ENSSSCG00000028204	2608	59.7715	1086.04	1.7059	2.4e-07	0.000325008	Up	TREH	ko01100//Metabolic pathways;ko00500//Starch and sucrose metabolism	GO:0046658//anchored component of plasma membrane;GO:0070062//extracellular exosome	GO:0004555//alpha,alpha-trehalase activity	GO:0005993//trehalose catabolic process;GO:0009887//organ morphogenesis	gi|296480197|tpg|DAA22312.1|/0/TPA: trehalase (brush-border membrane glycoprotein) [Bos taurus]
ENSSSCG00000011812	1113	100.604	24.4301	-1.41137	1.34e-05	0.00682128	Down	TPRG1	-	GO:0005737//cytoplasm	-	-	gi|927201935|ref|XP_013837732.1|/0/PREDICTED: tumor protein p63-regulated gene 1 protein isoform X2 [Sus scrofa]
ENSSSCG00000037096	3587	65.4842	295.722	1.18685	0.000164242	0.0403413	Up	TMEM88	-	-	-	-	gi|350590858|ref|XP_003132006.3|/8.06676e-57/PREDICTED: transmembrane protein 88 [Sus scrofa]
ENSSSCG00000032327	3077	40.9889	144.361	1.12789	0.000142338	0.0372065	Up	TMEM169	-	GO:0016021//integral component of membrane	-	-	gi|927211315|ref|XP_005672233.2|/0/PREDICTED: transmembrane protein 169 [Sus scrofa]
ENSSSCG00000011176	1574	61.3296	13.1178	-1.22474	0.000208868	0.0495922	Down	SUSD4	-	-	-	GO:0030449//regulation of complement activation	gi|350589340|ref|XP_003130620.3|/0/PREDICTED: sushi domain-containing protein 4 isoform X2 [Sus scrofa]
ENSSSCG00000006160	2289	34.3941	138.955	1.16465	0.000204511	0.0489658	Up	STMN2	ko05206//MicroRNAs in cancer;ko04010//MAPK signaling pathway	GO:0030027//lamellipodium;GO:0030426//growth cone;GO:0043025//neuronal cell body;GO:0048471//perinuclear region of cytoplasm	GO:0015631//tubulin binding;GO:0048306//calcium-dependent protein binding	GO:0007026//negative regulation of microtubule depolymerization;GO:0010976//positive regulation of neuron projection development;GO:0010977//negative regulation of neuron projection development;GO:0031115//negative regulation of microtubule polymerization;GO:0031117//positive regulation of microtubule depolymerization;GO:1990090//cellular response to nerve growth factor stimulus	gi|77736191|ref|NP_001029794.1|/1.55958e-110/stathmin-2 [Bos taurus]//gi|77736191|ref|NP_001029794.1|/1.73699e-121/stathmin-2 [Bos taurus]//gi|440903736|gb|ELR54358.1|/2.39072e-91/Stathmin-2, partial [Bos mutus]
ENSSSCG00000038508	8585	82.3644	468.592	1.35236	2.26e-05	0.0100818	Up	SPTBN2	ko04530//Tight junction	-	-	-	gi|560976907|ref|XP_006210738.1|/0/PREDICTED: spectrin beta chain, non-erythrocytic 2 isoform X4 [Vicugna pacos]//gi|970730204|ref|XP_015100236.1|/0/PREDICTED: spectrin beta chain, non-erythrocytic 2 isoform X2 [Vicugna pacos]//gi|560976907|ref|XP_006210738.1|/0/PREDICTED: spectrin beta chain, non-erythrocytic 2 isoform X4 [Vicugna pacos]
ENSSSCG00000009216	2686	1460.39	12181.4	1.33377	5.36e-05	0.0195828	Up	SPP1	ko05200//Pathways in cancer;ko04151//PI3K-Akt signaling pathway;ko04015//Rap1 signaling pathway;ko04810//Regulation of actin cytoskeleton;ko04514//Cell adhesion molecules (CAMs);ko05205//Proteoglycans in cancer;ko04145//Phagosome;ko04510//Focal adhesion;ko04360//Axon guidance;ko05414//Dilated cardiomyopathy;ko04670//Leukocyte transendothelial migration;ko04611//Platelet activation;ko05206//MicroR…	GO:0005615//extracellular space;GO:0070062//extracellular exosome	GO:0005125//cytokine activity;GO:0050840//extracellular matrix binding	GO:0001649//osteoblast differentiation;GO:0007155//cell adhesion;GO:0031214//biomineral tissue development;GO:0033280//response to vitamin D;GO:0045780//positive regulation of bone resorption	gi|47522868|ref|NP_999188.1|/2.58097e-159/osteopontin precursor [Sus scrofa]
ENSSSCG00000013393	5536	6121.43	2280.27	-1.30541	7.48e-06	0.00453154	Down	SPON1	ko04115//p53 signaling pathway	GO:0005578//proteinaceous extracellular matrix;GO:0005615//extracellular space;GO:0005788//endoplasmic reticulum lumen	GO:0005515//protein binding;GO:0046872//metal ion binding	GO:0007155//cell adhesion;GO:0036066//protein O-linked fucosylation	gi|795247366|ref|XP_011809675.1|/0/1//gi|635015036|ref|XP_008004372.1|/0/1
ENSSSCG00000038355	1954	70.7991	6.93072	-1.54857	2.63e-06	0.0020782	Down	SP5	-	-	GO:0043565//sequence-specific DNA binding	GO:0006351//transcription, DNA-templated;GO:0009653//anatomical structure morphogenesis;GO:0044767//single-organism developmental process	gi|826311932|ref|XP_012506190.1|/0/1
ENSSSCG00000039798	3528	66.3705	411.733	1.24399	0.00014464	0.0373304	Up	SLC11A1	ko04142//Lysosome;ko04978//Mineral absorption	GO:0005764//lysosome;GO:0005768//endosome;GO:0005770//late endosome;GO:0005886//plasma membrane;GO:0009279//cell outer membrane;GO:0010008//endosome membrane;GO:0016021//integral component of membrane;GO:0030659//cytoplasmic vesicle membrane;GO:0030670//phagocytic vesicle membrane;GO:0070821//tertiary granule membrane;GO:0071944//cell periphery;GO:0098588//bounding membrane of organelle;GO:0098805	GO:0005384//manganese ion transmembrane transporter activity;GO:0042803//protein homodimerization activity;GO:0046915//transition metal ion transmembrane transporter activity;GO:0051139//metal ion:proton antiporter activity	GO:0000060//protein import into nucleus, translocation;GO:0000165//MAPK cascade;GO:0001818//negative regulation of cytokine production;GO:0001819//positive regulation of cytokine production;GO:0002252;GO:0002309//T cell proliferation involved in immune response;GO:0002369//T cell cytokine production;GO:0002460//adaptive immune response based on somatic recombination of immune receptors built from…	gi|47523206|ref|NP_998986.1|/0/natural resistance-associated macrophage protein 1 [Sus scrofa]//gi|47523206|ref|NP_998986.1|/0/natural resistance-associated macrophage protein 1 [Sus scrofa]
ENSSSCG00000006400	2646	13.0236	133.666	1.37568	3.05e-05	0.0122379	Up	SLAMF9	-	-	-	-	gi|927120471|ref|XP_013852331.1|/7.7872e-172/PREDICTED: SLAM family member 9 [Sus scrofa]
ENSSSCG00000006245	2375	5627.29	17045.3	1.03457	8.8e-05	0.0272592	Up	SDR16C5	ko00830//Retinol metabolism	GO:0005789//endoplasmic reticulum membrane;GO:0016021//integral component of membrane	GO:0004745//retinol dehydrogenase activity	GO:0042572//retinol metabolic process;GO:0042574//retinal metabolic process;GO:0043616//keratinocyte proliferation;GO:0055114//oxidation-reduction process	gi|305855178|ref|NP_001182297.1|/0/epidermal retinol dehydrogenase 2 [Sus scrofa]
ENSSSCG00000015353	3126	209.8	1601	1.69022	7.16e-08	0.000127522	Up	SCIN	ko04810//Regulation of actin cytoskeleton;ko05203//Viral carcinogenesis;ko04666//Fc gamma R-mediated phagocytosis	GO:0005903//brush border;GO:0005938//cell cortex;GO:0070062//extracellular exosome	GO:0001786//phosphatidylserine binding;GO:0005509//calcium ion binding;GO:0005546//phosphatidylinositol-4,5-bisphosphate binding;GO:0051015//actin filament binding	GO:0008285//negative regulation of cell proliferation;GO:0017156//calcium ion regulated exocytosis;GO:0032330//regulation of chondrocyte differentiation;GO:0042989//sequestering of actin monomers;GO:0043065//positive regulation of apoptotic process;GO:0045654//positive regulation of megakaryocyte differentiation;GO:0051014//actin filament severing;GO:0051047//positive regulation of secretion;GO:0…	gi|347800709|ref|NP_001231660.1|/0/adseverin [Sus scrofa]//gi|347800709|ref|NP_001231660.1|/0/adseverin [Sus scrofa]//gi|347800709|ref|NP_001231660.1|/0/adseverin [Sus scrofa]
ENSSSCG00000001987	3489	48.4934	305.067	1.99448	9.34e-16	5.32e-12	Up	RIPK3	ko04668//TNF signaling pathway;ko04623//Cytosolic DNA-sensing pathway	GO:0005829//cytosol	GO:0000166//nucleotide binding;GO:0004672//protein kinase activity	GO:0001914//regulation of T cell mediated cytotoxicity;GO:0032147//activation of protein kinase activity;GO:0032649//regulation of interferon-gamma production;GO:0033077//T cell differentiation in thymus;GO:0046006//regulation of activated T cell proliferation;GO:0046777//protein autophosphorylation;GO:0048535//lymph node development;GO:0048536//spleen development;GO:0048538//thymus development;G…	gi|335292526|ref|XP_001927459.2|/0/PREDICTED: receptor-interacting serine/threonine-protein kinase 3 [Sus scrofa]
ENSSSCG00000032416	4806	451.893	1632.54	1.27707	3.12e-07	0.000386215	Up	RGS1	-	GO:0005737//cytoplasm;GO:0005886//plasma membrane	GO:0005096//GTPase activator activity	GO:0008277//regulation of G-protein coupled receptor protein signaling pathway;GO:0043547//positive regulation of GTPase activity	gi|335296023|ref|XP_003357665.1|/1.15493e-148/PREDICTED: regulator of G-protein signaling 1 isoform X1 [Sus scrofa]
ENSSSCG00000008348	5253	262.515	1069.01	1.19871	6.97e-05	0.0226885	Up	PLEK	ko05200//Pathways in cancer;ko04151//PI3K-Akt signaling pathway;ko04015//Rap1 signaling pathway;ko05205//Proteoglycans in cancer;ko04144//Endocytosis;ko05166//HTLV-I infection;ko04510//Focal adhesion;ko04014//Ras signaling pathway;ko05169//Epstein-Barr virus infection;ko05152//Tuberculosis;ko04611//Platelet activation;ko04010//MAPK signaling pathway;ko05145//Toxoplasmosis;ko04530//Tight junction;…	GO:0005737//cytoplasm;GO:0032587//ruffle membrane	GO:0005080//protein kinase C binding;GO:0042803//protein homodimerization activity;GO:0043325//phosphatidylinositol-3,4-bisphosphate binding	GO:0002244//hematopoietic progenitor cell differentiation;GO:0006904//vesicle docking involved in exocytosis;GO:0007229//integrin-mediated signaling pathway;GO:0010572//positive regulation of platelet activation;GO:0010920//negative regulation of inositol phosphate biosynthetic process;GO:0010925//positive regulation of inositol-polyphosphate 5-phosphatase activity;GO:0030836//positive regulation…	gi|927110788|ref|XP_013851548.1|/0/PREDICTED: pleckstrin [Sus scrofa]
ENSSSCG00000000591	6402	1905.85	5904.15	1.09896	2.36e-05	0.0101727	Up	PIK3C2G	ko01100//Metabolic pathways;ko04070//Phosphatidylinositol signaling system;ko00562//Inositol phosphate metabolism	GO:0005622//intracellular;GO:0005886//plasma membrane;GO:0005942//phosphatidylinositol 3-kinase complex	GO:0016303//1-phosphatidylinositol-3-kinase activity;GO:0035005//1-phosphatidylinositol-4-phosphate 3-kinase activity;GO:0035091//phosphatidylinositol binding	GO:0036092//phosphatidylinositol-3-phosphate biosynthetic process;GO:0046854//phosphatidylinositol phosphorylation;GO:0048015//phosphatidylinositol-mediated signaling	gi|927131643|ref|XP_013843806.1|/0/PREDICTED: phosphatidylinositol 4-phosphate 3-kinase C2 domain-containing subunit gamma isoform X2 [Sus scrofa]//gi|927131643|ref|XP_013843806.1|/0/PREDICTED: phosphatidylinositol 4-phosphate 3-kinase C2 domain-containing subunit gamma isoform X2 [Sus scrofa]
ENSSSCG00000011465	4139	0	541.549	5.27038	4.19e-72	1.19e-67	Up	PDE12	-	GO:0005759//mitochondrial matrix	GO:0004535//poly(A)-specific ribonuclease activity;GO:0046872//metal ion binding	GO:0006397//mRNA processing;GO:0090503//RNA phosphodiester bond hydrolysis, exonucleolytic	gi|311269040|ref|XP_001926497.2|/0/PREDICTED: 2',5'-phosphodiesterase 12 [Sus scrofa]
ENSSSCG00000015512	9818	11488.4	1562.16	-1.92766	2.61e-09	7.43e-06	Down	PAPPA2	-	GO:0070062//extracellular exosome	GO:0008237//metallopeptidase activity;GO:0008270//zinc ion binding	GO:0006508//proteolysis;GO:0060349//bone morphogenesis	gi|350589027|ref|XP_003130378.3|/0/PREDICTED: pappalysin-2 [Sus scrofa]
ENSSSCG00000000856	1697	228.129	81.7595	-1.28386	6.99e-06	0.00453154	Down	PAH	ko01100//Metabolic pathways;ko01230//Biosynthesis of amino acids;ko00360//Phenylalanine metabolism;ko00400//Phenylalanine, tyrosine and tryptophan biosynthesis	-	-	-	gi|755750271|ref|XP_003989232.3|/0/PREDICTED: phenylalanine-4-hydroxylase [Felis catus]//gi|755750271|ref|XP_003989232.3|/0/PREDICTED: phenylalanine-4-hydroxylase [Felis catus]
ENSSSCG00000026478	5091	151.484	912.183	1.3929	1.66e-05	0.00794562	Up	PADI2	-	GO:0005737//cytoplasm;GO:0035327//transcriptionally active chromatin;GO:0070062//extracellular exosome	GO:0004668//protein-arginine deiminase activity;GO:0005509//calcium ion binding;GO:0030331//estrogen receptor binding	GO:0010848//regulation of chromatin disassembly;GO:0021762//substantia nigra development;GO:0030520//intracellular estrogen receptor signaling pathway;GO:0036413//histone H3-R26 citrullination;GO:0048096//chromatin-mediated maintenance of transcription;GO:0070100//negative regulation of chemokine-mediated signaling pathway;GO:1901624//negative regulation of lymphocyte chemotaxis	gi|335290579|ref|XP_003356214.1|/0/PREDICTED: protein-arginine deiminase type-2 isoform X1 [Sus scrofa]//gi|335290579|ref|XP_003356214.1|/0/PREDICTED: protein-arginine deiminase type-2 isoform X1 [Sus scrofa]//gi|335290579|ref|XP_003356214.1|/0/PREDICTED: protein-arginine deiminase type-2 isoform X1 [Sus scrofa]
ENSSSCG00000010101	2819	145.549	485.175	1.16875	3.42e-05	0.0133325	Up	P2RX6	ko04080//Neuroactive ligand-receptor interaction;ko04020//Calcium signaling pathway	GO:0005639//integral component of nuclear inner membrane;GO:0005737//cytoplasm;GO:0005887//integral component of plasma membrane;GO:0030054//cell junction	GO:0001614//purinergic nucleotide receptor activity;GO:0004931//extracellular ATP-gated cation channel activity;GO:0005524//ATP binding;GO:0042802//identical protein binding	GO:0033198//response to ATP;GO:0035590//purinergic nucleotide receptor signaling pathway;GO:0051260//protein homooligomerization;GO:0098655//cation transmembrane transport	gi|927205938|ref|XP_013838649.1|/0/PREDICTED: P2X purinoceptor 6 [Sus scrofa]//gi|927205938|ref|XP_013838649.1|/0/PREDICTED: P2X purinoceptor 6 [Sus scrofa]
ENSSSCG00000000647	1552	55.3005	279.066	1.36705	1.17e-05	0.00629936	Up	OLR1	ko04145//Phagosome;ko03320//PPAR signaling pathway	GO:0005654//nucleoplasm;GO:0005886//plasma membrane;GO:0016021//integral component of membrane;GO:0043235//receptor complex;GO:0045121//membrane raft;GO:0070062//extracellular exosome	GO:0005041//low-density lipoprotein receptor activity;GO:0005515//protein binding;GO:0030246//carbohydrate binding	GO:0002376//immune system process;GO:0006898//receptor-mediated endocytosis;GO:0006954//inflammatory response;GO:0007155//cell adhesion;GO:0032930//positive regulation of superoxide anion generation;GO:0045908//negative regulation of vasodilation	gi|47523234|ref|NP_998970.1|/3.4751e-156/oxidized low-density lipoprotein receptor 1 [Sus scrofa]
ENSSSCG00000015559	4620	400.302	1521.23	1.19104	3.8e-05	0.0142714	Up	NCF2	ko04145//Phagosome;ko04670//Leukocyte transendothelial migration;ko05140//Leishmaniasis;ko04380//Osteoclast differentiation	GO:0001669//acrosomal vesicle;GO:0005730//nucleolus	GO:0008022//protein C-terminus binding;GO:0016175//superoxide-generating NADPH oxidase activity;GO:0048365//Rac GTPase binding	GO:0042554//superoxide anion generation;GO:0055114//oxidation-reduction process	gi|190360556|ref|NP_001116614.1|/0/neutrophil cytosol factor 2 [Sus scrofa]//gi|190360556|ref|NP_001116614.1|/0/neutrophil cytosol factor 2 [Sus scrofa]//gi|190360556|ref|NP_001116614.1|/0/neutrophil cytosol factor 2 [Sus scrofa]
ENSSSCG00000006979	5433	263.257	1573.32	1.59948	1.03e-07	0.000172992	Up	MSR1	ko04145//Phagosome	GO:0005581//collagen trimer;GO:0005887//integral component of plasma membrane;GO:0016021//integral component of membrane;GO:0030666//endocytic vesicle membrane;GO:0032991//macromolecular complex;GO:0034362//low-density lipoprotein particle	GO:0005044//scavenger receptor activity;GO:0005515//protein binding;GO:0030169//low-density lipoprotein particle binding	GO:0006898//receptor-mediated endocytosis;GO:0010744//positive regulation of macrophage derived foam cell differentiation;GO:0010886//positive regulation of cholesterol storage;GO:0030301//cholesterol transport;GO:0034381//plasma lipoprotein particle clearance;GO:0042953//lipoprotein transport	gi|345110646|ref|NP_001230803.1|/0/macrophage scavenger receptor types I and II [Sus scrofa]//gi|345110646|ref|NP_001230803.1|/0/macrophage scavenger receptor types I and II [Sus scrofa]//gi|345110646|ref|NP_001230803.1|/0/macrophage scavenger receptor types I and II [Sus scrofa]//gi|345110646|ref|NP_001230803.1|/0/macrophage scavenger receptor types I and II [Sus scrofa]//gi|345110646|ref|NP_001…
ENSSSCG00000014984	1961	1794.33	977.128	-1.04739	1.04e-06	0.000952594	Down	MMP27	-	-	-	-	gi|927175717|ref|XP_013834779.1|/0/PREDICTED: matrix metalloproteinase-27 isoform X1 [Sus scrofa]
ENSSSCG00000000492	1264	142.357	1522.97	2.04667	4.43e-11	1.8e-07	Up	LYZ	ko04970//Salivary secretion	GO:0005615//extracellular space;GO:0070062//extracellular exosome	GO:0003796//lysozyme activity;GO:0042802//identical protein binding	GO:0001895//retina homeostasis;GO:0007586//digestion;GO:0008152//metabolic process;GO:0019835//cytolysis;GO:0042742//defense response to bacterium	gi|269914120|ref|NP_999557.2|/3.77951e-96/lysozyme C-3 precursor [Sus scrofa]
ENSSSCG00000004629	1376	164.571	77.1577	-1.08103	0.000163299	0.0403413	Down	LYSMD2	-	-	-	-	gi|545800502|ref|XP_005659663.1|/1.29258e-123/PREDICTED: lysM and putative peptidoglycan-binding domain-containing protein 2 isoform X1 [Sus scrofa]//gi|335279691|ref|XP_003353406.1|/7.50706e-85/PREDICTED: lysM and putative peptidoglycan-binding domain-containing protein 2 isoform X2 [Sus scrofa]//gi|335279691|ref|XP_003353406.1|/7.50706e-85/PREDICTED: lysM and putative peptidoglycan-binding doma…
ENSSSCG00000006329	3603	109.08	50.4613	-1.06005	0.000112587	0.0317813	Down	LMX1A	-	GO:0005634//nucleus	GO:0000977//RNA polymerase II regulatory region sequence-specific DNA binding;GO:0008270//zinc ion binding	GO:0001558//regulation of cell growth;GO:0007411//axon guidance;GO:0021542//dentate gyrus development;GO:0021549//cerebellum development;GO:0021953//central nervous system neuron differentiation;GO:0030901//midbrain development;GO:0045665//negative regulation of neuron differentiation;GO:0045944//positive regulation of transcription from RNA polymerase II promoter;GO:0071542//dopaminergic neuron …	gi|507535946|ref|XP_004652009.1|/0/1//gi|507535946|ref|XP_004652009.1|/0/1//gi|507535946|ref|XP_004652009.1|/0/1
ENSSSCG00000009412	4234	1346.85	4791.9	1.12996	0.00011293	0.0317813	Up	LCP1	-	GO:0001725//stress fiber;GO:0001726//ruffle;GO:0001891//phagocytic cup;GO:0002102//podosome;GO:0005615//extracellular space;GO:0005829//cytosol;GO:0005884//actin filament;GO:0005925//focal adhesion;GO:0030175//filopodium;GO:0070062//extracellular exosome	GO:0005509//calcium ion binding;GO:0042802//identical protein binding;GO:0051015//actin filament binding;GO:0051020//GTPase binding	GO:0002286//T cell activation involved in immune response;GO:0010737//protein kinase A signaling;GO:0016477//cell migration;GO:0022617//extracellular matrix disassembly;GO:0033157//regulation of intracellular protein transport;GO:0051017//actin filament bundle assembly;GO:0071803//positive regulation of podosome assembly	gi|984097288|ref|XP_015339783.1|/0/1//gi|984097288|ref|XP_015339783.1|/0/1//gi|984097288|ref|XP_015339783.1|/0/1//gi|984097288|ref|XP_015339783.1|/0/1//gi|640786526|ref|XP_008049006.1|/0/1
ENSSSCG00000003567	1801	41.4341	142.38	1.12827	0.000138181	0.0367949	Up	KDF1	-	GO:0005938//cell cortex;GO:0030054//cell junction;GO:0031252//cell leading edge	-	GO:0003334//keratinocyte development;GO:0010482//regulation of epidermal cell division;GO:0010839//negative regulation of keratinocyte proliferation;GO:0016331//morphogenesis of embryonic epithelium;GO:0045606//positive regulation of epidermal cell differentiation;GO:0048589//developmental growth;GO:0060887//limb epidermis development;GO:0061436//establishment of skin barrier;GO:2000647//negative…	gi|149643031|ref|NP_001092573.1|/0/keratinocyte differentiation factor 1 [Bos taurus]
ENSSSCG00000007073	2606	168.957	469.003	1.03546	3.71e-05	0.0142714	Up	ISM1	ko05200//Pathways in cancer;ko04151//PI3K-Akt signaling pathway;ko04015//Rap1 signaling pathway;ko04810//Regulation of actin cytoskeleton;ko04514//Cell adhesion molecules (CAMs);ko05205//Proteoglycans in cancer;ko04145//Phagosome;ko04510//Focal adhesion;ko04360//Axon guidance;ko05414//Dilated cardiomyopathy;ko04670//Leukocyte transendothelial migration;ko04611//Platelet activation;ko05206//MicroR…	GO:0005576//extracellular region	-	-	gi|311274381|ref|XP_001925035.2|/0/PREDICTED: isthmin-1 isoform X1 [Sus scrofa]//gi|640803936|ref|XP_008058344.1|/0/1
ENSSSCG00000030345	3340	91.6009	9.7787	-1.27676	7.79e-05	0.0249527	Down	INPP5J	ko01100//Metabolic pathways;ko04910//Insulin signaling pathway;ko04070//Phosphatidylinositol signaling system;ko00562//Inositol phosphate metabolism	-	-	-	gi|927205609|ref|XP_005670913.2|/0/PREDICTED: phosphatidylinositol 4,5-bisphosphate 5-phosphatase A isoform X3 [Sus scrofa]
ENSSSCG00000011717	8837	631.082	189.968	-1.35983	4.95e-06	0.00352394	Down	IGSF10	-	-	-	-	gi|594681006|ref|XP_007188196.1|/0/PREDICTED: immunoglobulin superfamily member 10 isoform X1 [Balaenoptera acutorostrata scammoni]//gi|594681006|ref|XP_007188196.1|/0/PREDICTED: immunoglobulin superfamily member 10 isoform X1 [Balaenoptera acutorostrata scammoni]//gi|594681006|ref|XP_007188196.1|/0/PREDICTED: immunoglobulin superfamily member 10 isoform X1 [Balaenoptera acutorostrata scammoni]
ENSSSCG00000012667	5201	367.731	104.986	-1.29237	7.01e-05	0.0226885	Down	IGSF1	ko04380//Osteoclast differentiation;ko04662//B cell receptor signaling pathway	GO:0016021//integral component of membrane	GO:0004872//receptor activity;GO:0034711//inhibin binding	GO:0006355//regulation of transcription, DNA-templated;GO:0007165//signal transduction	gi|194044944|ref|XP_001926045.1|/0/PREDICTED: immunoglobulin superfamily member 1 [Sus scrofa]//gi|194044944|ref|XP_001926045.1|/0/PREDICTED: immunoglobulin superfamily member 1 [Sus scrofa]//gi|194044944|ref|XP_001926045.1|/0/PREDICTED: immunoglobulin superfamily member 1 [Sus scrofa]//gi|194044944|ref|XP_001926045.1|/0/PREDICTED: immunoglobulin superfamily member 1 [Sus scrofa]//gi|194044944|re…
ENSSSCG00000038783	1331	1284.48	556.831	-1.15128	9.18e-05	0.028122	Down	IGFBP3	ko05202//Transcriptional misregulation in cancer;ko04115//p53 signaling pathway	GO:0005634//nucleus;GO:0042567//insulin-like growth factor ternary complex;GO:0044421;GO:0070062//extracellular exosome	GO:0001968//fibronectin binding;GO:0005520//insulin-like growth factor binding;GO:0008160//protein tyrosine phosphatase activator activity;GO:0031994//insulin-like growth factor I binding;GO:0031995//insulin-like growth factor II binding	GO:0001558//regulation of cell growth;GO:0001649//osteoblast differentiation;GO:0001933//negative regulation of protein phosphorylation;GO:0009966//regulation of signal transduction;GO:0010906//regulation of glucose metabolic process;GO:0014912//negative regulation of smooth muscle cell migration;GO:0032868//response to insulin;GO:0043065//positive regulation of apoptotic process;GO:0043085//posi…	gi|90110645|sp|P16611.3|IBP3_PIG/1.53126e-41/RecName: Full=Insulin-like growth factor-binding protein 3; Short=IBP-3; Short=IGF-binding protein 3; Short=IGFBP-3; Flags: Precursor//gi|90110645|sp|P16611.3|IBP3_PIG/5.37538e-166/RecName: Full=Insulin-like growth factor-binding protein 3; Short=IBP-3; Short=IGF-binding protein 3; Short=IGFBP-3; Flags: Precursor
ENSSSCG00000022351	2838	1.92869	766.693	1.92527	3.02e-09	7.82e-06	Up	GSTO1	ko05200//Pathways in cancer;ko05215//Prostate cancer;ko05204//Chemical carcinogenesis;ko00980//Metabolism of xenobiotics by cytochrome P450;ko00480//Glutathione metabolism;ko00982//Drug metabolism - cytochrome P450	GO:0005829//cytosol;GO:0070062//extracellular exosome	GO:0004364//glutathione transferase activity;GO:0045174//glutathione dehydrogenase (ascorbate) activity;GO:0050610//methylarsonate reductase activity	GO:0006749//glutathione metabolic process;GO:0010880//regulation of release of sequestered calcium ion into cytosol by sarcoplasmic reticulum;GO:0019852//L-ascorbic acid metabolic process;GO:0042178//xenobiotic catabolic process;GO:0055114//oxidation-reduction process;GO:0060315//negative regulation of ryanodine-sensitive calcium-release channel activity;GO:0060316//positive regulation of ryanodi…	gi|47522916|ref|NP_999215.1|/9.40415e-173/glutathione S-transferase omega-1 [Sus scrofa]
ENSSSCG00000038824	7423	162.606	785.863	1.19838	0.000153567	0.0387207	Up	FRRS1L	-	GO:0005886//plasma membrane;GO:0016021//integral component of membrane;GO:0030054//cell junction;GO:0045202//synapse	-	-	gi|385648274|ref|NP_001245311.1|/0/DOMON domain-containing protein FRRS1L [Sus scrofa]
ENSSSCG00000039474	1173	201.978	0	-3.70901	1.36e-30	1.29e-26	Down	FBXL14	-	GO:0005654//nucleoplasm;GO:0005794//Golgi apparatus	GO:0004842//ubiquitin-protein transferase activity;GO:0005515//protein binding	GO:0042787//protein ubiquitination involved in ubiquitin-dependent protein catabolic process	gi|115495249|ref|NP_001069415.1|/0/F-box/LRR-repeat protein 14 [Bos taurus]//gi|115495249|ref|NP_001069415.1|/0/F-box/LRR-repeat protein 14 [Bos taurus]
ENSSSCG00000006729	5217	2605.66	1155.12	-1.08607	0.000153066	0.0387207	Down	FAM46C	ko04810//Regulation of actin cytoskeleton;ko05205//Proteoglycans in cancer;ko04919//Thyroid hormone signaling pathway;ko04024//cAMP signaling pathway;ko04261//Adrenergic signaling in cardiomyocytes;ko04970//Salivary secretion;ko03015//mRNA surveillance pathway;ko04260//Cardiac muscle contraction;ko04971//Gastric acid secretion;ko04972//Pancreatic secretion;ko04976//Bile secretion	-	-	-	gi|937575812|ref|NP_001302538.1|/0/uncharacterized protein LOC100525341 [Sus scrofa]//gi|937575812|ref|NP_001302538.1|/0/uncharacterized protein LOC100525341 [Sus scrofa]
ENSSSCG00000025240	4846	195.385	71.8007	-1.26521	7.21e-06	0.00453154	Down	DDIT4L	ko04151//PI3K-Akt signaling pathway;ko05206//MicroRNAs in cancer;ko04150//mTOR signaling pathway	GO:0005737//cytoplasm	-	GO:0009968//negative regulation of signal transduction	gi|927171050|ref|XP_013834459.1|/2.12827e-122/PREDICTED: DNA damage-inducible transcript 4-like protein [Sus scrofa]//gi|927171050|ref|XP_013834459.1|/2.12827e-122/PREDICTED: DNA damage-inducible transcript 4-like protein [Sus scrofa]
ENSSSCG00000006043	5016	8.54677	154.1	1.64954	5.82e-07	0.000663834	Up	DCSTAMP	ko05200//Pathways in cancer;ko04151//PI3K-Akt signaling pathway;ko04015//Rap1 signaling pathway;ko04810//Regulation of actin cytoskeleton;ko04514//Cell adhesion molecules (CAMs);ko05205//Proteoglycans in cancer;ko04145//Phagosome;ko04510//Focal adhesion;ko04360//Axon guidance;ko05414//Dilated cardiomyopathy;ko04670//Leukocyte transendothelial migration;ko04611//Platelet activation;ko05206//MicroR…	GO:0005887//integral component of plasma membrane;GO:0009986//cell surface;GO:0010008//endosome membrane;GO:0030176//integral component of endoplasmic reticulum membrane	-	GO:0030308//negative regulation of cell growth;GO:0034241//positive regulation of macrophage fusion;GO:0036006//cellular response to macrophage colony-stimulating factor stimulus;GO:0043011//myeloid dendritic cell differentiation;GO:0045657//positive regulation of monocyte differentiation;GO:0045780//positive regulation of bone resorption;GO:0061025//membrane fusion;GO:0071353//cellular response …	gi|297632385|ref|NP_001172079.1|/0/dendritic cell-specific transmembrane protein [Sus scrofa]//gi|297632385|ref|NP_001172079.1|/0/dendritic cell-specific transmembrane protein [Sus scrofa]
ENSSSCG00000033844	7109	1573.22	799.261	-1.09886	2.33e-07	0.000325008	Down	CYP1B1	ko05206//MicroRNAs in cancer;ko05204//Chemical carcinogenesis;ko00140//Steroid hormone biosynthesis;ko00980//Metabolism of xenobiotics by cytochrome P450;ko04913//Ovarian steroidogenesis;ko00380//Tryptophan metabolism	GO:0005739//mitochondrion;GO:0016021//integral component of membrane	GO:0005506//iron ion binding;GO:0016712//oxidoreductase activity, acting on paired donors, with incorporation or reduction of molecular oxygen, reduced flavin or flavoprotein as one donor, and incorporation of one atom of oxygen;GO:0020037//heme binding	GO:0002930//trabecular meshwork development;GO:0006805//xenobiotic metabolic process;GO:0006809//nitric oxide biosynthetic process;GO:0008202//steroid metabolic process;GO:0008210//estrogen metabolic process;GO:0008285//negative regulation of cell proliferation;GO:0008631//intrinsic apoptotic signaling pathway in response to oxidative stress;GO:0009404//toxin metabolic process;GO:0009636//respons…	gi|602679063|ref|XP_007445846.1|/0/PREDICTED: cytochrome P450 1B1-like [Lipotes vexillifer]//gi|594625261|ref|XP_007167209.1|/0/PREDICTED: cytochrome P450 1B1-like [Balaenoptera acutorostrata scammoni]
ENSSSCG00000025795	3508	36.2044	327.769	1.49167	5.82e-06	0.00404513	Up	CSF3R	ko05200//Pathways in cancer;ko04151//PI3K-Akt signaling pathway;ko04060//Cytokine-cytokine receptor interaction;ko04640//Hematopoietic cell lineage;ko04630//Jak-STAT signaling pathway	GO:0016021//integral component of membrane	GO:0004896//cytokine receptor activity	GO:0019221//cytokine-mediated signaling pathway;GO:0030593//neutrophil chemotaxis;GO:0045637//regulation of myeloid cell differentiation	gi|927225578|ref|XP_013847593.1|/0/PREDICTED: LOW QUALITY PROTEIN: granulocyte colony-stimulating factor receptor [Sus scrofa]
ENSSSCG00000013909	1792	1292.01	369.881	-1.26458	0.000110476	0.0317813	Down	CRLF1	ko04060//Cytokine-cytokine receptor interaction;ko05203//Viral carcinogenesis;ko04550//Signaling pathways regulating pluripotency of stem cells;ko04630//Jak-STAT signaling pathway	-	-	-	gi|817346854|ref|XP_012298908.1|/0/1//gi|927103154|ref|XP_003480798.2|/0/PREDICTED: cytokine receptor-like factor 1, partial [Sus scrofa]
ENSSSCG00000013263	3362	1405.43	604.888	-1.13215	0.000126236	0.0345837	Down	CREB3L1	ko04151//PI3K-Akt signaling pathway;ko05203//Viral carcinogenesis;ko04024//cAMP signaling pathway;ko05016//Huntington's disease;ko05161//Hepatitis B;ko04022//cGMP-PKG signaling pathway;ko04261//Adrenergic signaling in cardiomyocytes;ko05034//Alcoholism;ko05215//Prostate cancer;ko04728//Dopaminergic synapse;ko04152//AMPK signaling pathway;ko04931//Insulin resistance;ko04668//TNF signaling pathway;…	GO:0005634//nucleus;GO:0005783//endoplasmic reticulum	GO:0003700//transcription factor activity, sequence-specific DNA binding;GO:0035497//cAMP response element binding;GO:0043565//sequence-specific DNA binding	GO:0030968//endoplasmic reticulum unfolded protein response;GO:0045944//positive regulation of transcription from RNA polymerase II promoter	gi|311247921|ref|XP_003122877.1|/0/PREDICTED: cyclic AMP-responsive element-binding protein 3-like protein 1 [Sus scrofa]
ENSSSCG00000032151	2158	6362.02	973.398	-1.54469	2.9e-06	0.00223259	Down	CPZ	-	GO:0005578//proteinaceous extracellular matrix;GO:0005615//extracellular space;GO:0070062//extracellular exosome	GO:0004181//metallocarboxypeptidase activity;GO:0004185//serine-type carboxypeptidase activity;GO:0008270//zinc ion binding	GO:0006518//peptide metabolic process;GO:0016055//Wnt signaling pathway;GO:0016485//protein processing	gi|296486344|tpg|DAA28457.1|/0/TPA: carboxypeptidase Z [Bos taurus]
ENSSSCG00000008813	6219	66.2683	4.1247	-1.60374	1.01e-06	0.000952594	Down	CORIN	-	GO:0005887//integral component of plasma membrane;GO:0009986//cell surface	GO:0004252//serine-type endopeptidase activity	GO:0003050//regulation of systemic arterial blood pressure by atrial natriuretic peptide;GO:0007565//female pregnancy;GO:0016486//peptide hormone processing;GO:0035813//regulation of renal sodium excretion	gi|466001193|ref|XP_004268384.1|/0/PREDICTED: atrial natriuretic peptide-converting enzyme [Orcinus orca]//gi|927166834|ref|XP_013834104.1|/0/PREDICTED: atrial natriuretic peptide-converting enzyme isoform X2 [Sus scrofa]//gi|970703163|ref|XP_015105483.1|/0/PREDICTED: atrial natriuretic peptide-converting enzyme isoform X1 [Vicugna pacos]//gi|927166830|ref|XP_013834103.1|/0/PREDICTED: atrial natr…
ENSSSCG00000010256	3909	88.8078	325.042	1.28164	8.74e-07	0.000889564	Up	COL13A1	ko04974//Protein digestion and absorption	-	-	-	gi|927206510|ref|XP_013845875.1|/1.31918e-101/PREDICTED: collagen alpha-1(XIII) chain isoform X8 [Sus scrofa]//gi|982970420|ref|XP_015316508.1|/1.8698e-59/PREDICTED: collagen alpha-1(XIII) chain isoform X13 [Bos taurus]//gi|927206498|ref|XP_013845869.1|/5.76131e-135/PREDICTED: collagen alpha-1(XIII) chain isoform X2 [Sus scrofa]//gi|927206510|ref|XP_013845875.1|/1.52549e-73/PREDICTED: collagen al…
ENSSSCG00000007718	1749	163.909	35.5948	-1.25951	0.000137254	0.0367949	Down	CLDN4	ko04514//Cell adhesion molecules (CAMs);ko04670//Leukocyte transendothelial migration;ko05130//Pathogenic Escherichia coli infection;ko04530//Tight junction;ko05160//Hepatitis C	GO:0016021//integral component of membrane;GO:0030054//cell junction;GO:0044459	-	-	gi|239504564|ref|NP_001155109.1|/1.62313e-107/claudin-4 [Sus scrofa]
ENSSSCG00000011747	2057	1102.45	157.262	-1.63251	7.27e-07	0.000796642	Down	CLDN11	ko04514//Cell adhesion molecules (CAMs);ko04670//Leukocyte transendothelial migration;ko05130//Pathogenic Escherichia coli infection;ko04530//Tight junction;ko05160//Hepatitis C	GO:0005886//plasma membrane;GO:0005923//bicellular tight junction;GO:0016021//integral component of membrane;GO:0043209//myelin sheath;GO:0045178//basal part of cell;GO:0070062//extracellular exosome	GO:0005198//structural molecule activity	GO:0007155//cell adhesion;GO:0007283//spermatogenesis;GO:0008366//axon ensheathment	gi|239504566|ref|NP_001155113.1|/3.46658e-124/claudin-11 [Sus scrofa]
ENSSSCG00000003366	10180	1121.86	293.145	-1.40065	1.2e-05	0.00632902	Down	CHD5	-	-	-	-	gi|803259050|ref|XP_011989276.1|/0/PREDICTED: chromodomain-helicase-DNA-binding protein 5 isoform X3 [Ovis aries musimon]//gi|803259050|ref|XP_011989276.1|/0/PREDICTED: chromodomain-helicase-DNA-binding protein 5 isoform X3 [Ovis aries musimon]//gi|955507262|ref|XP_014639305.1|/0/PREDICTED: chromodomain-helicase-DNA-binding protein 5 isoform X1 [Ceratotherium simum simum]
ENSSSCG00000006379	2185	238.489	979.64	1.23668	3.81e-05	0.0142714	Up	CD48	ko04514//Cell adhesion molecules (CAMs);ko04640//Hematopoietic cell lineage;ko04650//Natural killer cell mediated cytotoxicity	-	-	GO:0009987//cellular process;GO:0044699	gi|343962638|ref|NP_001230643.1|/1.20832e-164/CD48 antigen precursor [Sus scrofa]
ENSSSCG00000003575	2499	54.2467	271.405	1.33456	2.42e-05	0.0102729	Up	CD164L2	ko04514//Cell adhesion molecules (CAMs);ko05169//Epstein-Barr virus infection;ko04142//Lysosome	GO:0016021//integral component of membrane	-	-	gi|545834532|ref|XP_005656138.1|/2.92708e-97/PREDICTED: CD164 sialomucin-like 2 protein isoform X1 [Sus scrofa]
ENSSSCG00000011322	3021	173.919	924.467	1.39073	7.19e-06	0.00453154	Up	CCR1	ko04060//Cytokine-cytokine receptor interaction;ko04062//Chemokine signaling pathway	GO:0005829//cytosol;GO:0005887//integral component of plasma membrane;GO:0009897//external side of plasma membrane	GO:0004435//phosphatidylinositol phospholipase C activity;GO:0016493//C-C chemokine receptor activity;GO:0035717//chemokine (C-C motif) ligand 7 binding;GO:0071791//chemokine (C-C motif) ligand 5 binding	GO:0002407//dendritic cell chemotaxis;GO:0006887//exocytosis;GO:0006954//inflammatory response;GO:0006955//immune response;GO:0007155//cell adhesion;GO:0007187//G-protein coupled receptor signaling pathway, coupled to cyclic nucleotide second messenger;GO:0007204//positive regulation of cytosolic calcium ion concentration;GO:0007267//cell-cell signaling;GO:0009611//response to wounding;GO:0010629…	gi|48675909|ref|NP_001001621.1|/0/C-C chemokine receptor type 1 [Sus scrofa]
ENSSSCG00000006233	3714	56.3699	13.0594	-1.43359	9.69e-06	0.005749	Down	CA8	ko00910//Nitrogen metabolism	GO:0005737//cytoplasm	GO:0004089//carbonate dehydratase activity;GO:0005515//protein binding;GO:0008270//zinc ion binding	GO:0006730//one-carbon metabolic process;GO:0048015//phosphatidylinositol-mediated signaling	gi|830020878|ref|XP_012614998.1|/6.7337e-168/1//gi|524925084|ref|XP_005066788.1|/0/1
ENSSSCG00000016859	2526	2214.71	393.548	-1.53984	2.6e-06	0.0020782	Down	C7	ko05322//Systemic lupus erythematosus;ko04610//Complement and coagulation cascades;ko05020//Prion diseases	GO:0005579//membrane attack complex;GO:0070062//extracellular exosome	-	GO:0006957//complement activation, alternative pathway;GO:0006958//complement activation, classical pathway;GO:0019835//cytolysis	gi|47523630|ref|NP_999447.1|/0/complement component C7 precursor [Sus scrofa]
ENSSSCG00000007501	3564	120.552	37.5542	-1.26165	6.42e-05	0.0217843	Down	BMP7	ko04060//Cytokine-cytokine receptor interaction;ko04390//Hippo signaling pathway;ko04350//TGF-beta signaling pathway	GO:0005615//extracellular space;GO:0031012//extracellular matrix	GO:0005125//cytokine activity;GO:0005160//transforming growth factor beta receptor binding;GO:0008083//growth factor activity;GO:0008201//heparin binding;GO:0070700//BMP receptor binding	GO:0001657//ureteric bud development;GO:0001707//mesoderm formation;GO:0001837//epithelial to mesenchymal transition;GO:0007411//axon guidance;GO:0009880//embryonic pattern specification;GO:0010664//negative regulation of striated muscle cell apoptotic process;GO:0010800//positive regulation of peptidyl-threonine phosphorylation;GO:0010862//positive regulation of pathway-restricted SMAD protein p…	gi|329664760|ref|NP_001192944.1|/0/bone morphogenetic protein 7 precursor [Bos taurus]//gi|157427746|ref|NP_001098760.1|/0/bone morphogenetic protein 7 precursor [Sus scrofa]
ENSSSCG00000040288	6686	194.791	64.114	-1.44413	5.06e-07	0.000600291	Down	ARNT2	ko05200//Pathways in cancer;ko05202//Transcriptional misregulation in cancer;ko05211//Renal cell carcinoma	GO:0005634//nucleus;GO:0005667//transcription factor complex;GO:0005737//cytoplasm	GO:0000978//RNA polymerase II core promoter proximal region sequence-specific DNA binding;GO:0001077//transcriptional activator activity, RNA polymerase II core promoter proximal region sequence-specific binding;GO:0017162//aryl hydrocarbon receptor binding;GO:0046982//protein heterodimerization activity	GO:0001666//response to hypoxia;GO:0001701//in utero embryonic development;GO:0007420//brain development;GO:0008284//positive regulation of cell proliferation;GO:0032355//response to estradiol;GO:0043066//negative regulation of apoptotic process;GO:0045944//positive regulation of transcription from RNA polymerase II promoter	gi|927158186|ref|XP_013844457.1|/0/PREDICTED: aryl hydrocarbon receptor nuclear translocator 2 isoform X3 [Sus scrofa]//gi|332000000|ref|NP_001193634.1|/0/aryl hydrocarbon receptor nuclear translocator 2 [Bos taurus]//gi|332000000|ref|NP_001193634.1|/0/aryl hydrocarbon receptor nuclear translocator 2 [Bos taurus]//gi|725553244|ref|XP_010348594.1|/0/1
ENSSSCG00000008937	2137	43.4936	421.524	1.55401	2.34e-06	0.00196161	Up	AMBN	-	GO:0005578//proteinaceous extracellular matrix	GO:0030345//structural constituent of tooth enamel	GO:0031214//biomineral tissue development;GO:0042475//odontogenesis of dentin-containing tooth	gi|47522894|ref|NP_999202.1|/0/ameloblastin precursor [Sus scrofa]//gi|47522894|ref|NP_999202.1|/0/ameloblastin precursor [Sus scrofa]
ENSSSCG00000002268	4390	99.0578	368.775	1.26476	1.57e-05	0.00770302	Up	AKAP5	-	GO:0005622//intracellular;GO:0016020//membrane	GO:0005515//protein binding;GO:0016301//kinase activity	GO:0006605//protein targeting;GO:0007165//signal transduction;GO:0016310//phosphorylation;GO:0044763;GO:0048522//positive regulation of cellular process	gi|927161513|ref|XP_013833739.1|/0/PREDICTED: A-kinase anchor protein 5 [Sus scrofa]
ENSSSCG00000038732	7234	203.047	656.172	1.12905	0.000110629	0.0317813	Up	AGAP2	ko04144//Endocytosis;ko04068//FoxO signaling pathway	GO:0043231//intracellular membrane-bounded organelle	-	GO:0044699;GO:0048522//positive regulation of cellular process	gi|755749375|ref|XP_011282386.1|/0/PREDICTED: arf-GAP with GTPase, ANK repeat and PH domain-containing protein 2 isoform X3 [Felis catus]//gi|759186289|ref|XP_011381194.1|/0/PREDICTED: arf-GAP with GTPase, ANK repeat and PH domain-containing protein 2 isoform X1 [Pteropus vampyrus]//gi|466042409|ref|XP_004276612.1|/0/PREDICTED: arf-GAP with GTPase, ANK repeat and PH domain-containing protein 2 is…
ENSSSCG00000012730	4163	428.038	103.465	-1.31953	5.62e-05	0.0200066	Down	AFF2	-	-	-	-	gi|927220281|ref|XP_013839485.1|/0/PREDICTED: AF4/FMR2 family member 2 isoform X5 [Sus scrofa]//gi|927220289|ref|XP_013839500.1|/0/PREDICTED: AF4/FMR2 family member 2 isoform X9 [Sus scrofa]//gi|927220281|ref|XP_013839485.1|/0/PREDICTED: AF4/FMR2 family member 2 isoform X5 [Sus scrofa]
ENSSSCG00000010772	3215	53.991	219.308	1.16424	0.000137574	0.0367949	Up	ADAM8	-	GO:0030141//secretory granule;GO:0043234//protein complex;GO:0044459	GO:0005488	GO:0002687//positive regulation of leukocyte migration;GO:0006954//inflammatory response;GO:0009605//response to external stimulus;GO:0016337//single organismal cell-cell adhesion;GO:0019538//protein metabolic process;GO:0030155//regulation of cell adhesion;GO:0031323//regulation of cellular metabolic process;GO:0031349//positive regulation of defense response;GO:0044260;GO:0044767//single-organi…	gi|927208910|ref|XP_013849740.1|/0/PREDICTED: disintegrin and metalloproteinase domain-containing protein 8 [Sus scrofa]
ENSSSCG00000035218	2234	108.438	509.617	1.26369	5.95e-05	0.0204722	Up	ADA2	ko01100//Metabolic pathways;ko00230//Purine metabolism	GO:0005615//extracellular space;GO:0005829//cytosol	GO:0004000//adenosine deaminase activity;GO:0008083//growth factor activity;GO:0008201//heparin binding;GO:0008270//zinc ion binding;GO:0031685//adenosine receptor binding;GO:0042803//protein homodimerization activity;GO:0043394//proteoglycan binding	GO:0006154//adenosine catabolic process;GO:0043103//hypoxanthine salvage;GO:0046103//inosine biosynthetic process	gi|47522854|ref|NP_999181.1|/0/adenosine deaminase CECR1 precursor [Sus scrofa]//gi|47522854|ref|NP_999181.1|/6.9745e-176/adenosine deaminase CECR1 precursor [Sus scrofa]
ENSSSCG00000026453	6079	405.058	1475.49	1.31792	2.1e-07	0.000315248	Up	ACSM5	ko01100//Metabolic pathways;ko00650//Butanoate metabolism;ko00785//Lipoic acid metabolism	GO:0005759//mitochondrial matrix	GO:0005524//ATP binding;GO:0005525//GTP binding;GO:0046872//metal ion binding;GO:0047760//butyrate-CoA ligase activity	GO:0006631//fatty acid metabolic process	gi|350581671|ref|XP_003124611.3|/0/PREDICTED: acyl-coenzyme A synthetase ACSM5, mitochondrial isoform X1 [Sus scrofa]//gi|350581671|ref|XP_003124611.3|/0/PREDICTED: acyl-coenzyme A synthetase ACSM5, mitochondrial isoform X1 [Sus scrofa]
ENSSSCG00000004145	2097	104.418	340.6	1.09391	4.03e-05	0.0149197	Up	ABRACL	-	-	-	-	gi|594687117|ref|XP_007191008.1|/8.12392e-34/PREDICTED: costars family protein ABRACL isoform X2 [Balaenoptera acutorostrata scammoni]//gi|594687117|ref|XP_007191008.1|/8.12392e-34/PREDICTED: costars family protein ABRACL isoform X2 [Balaenoptera acutorostrata scammoni]
ENSSSCG00000000660	7467	1060.7	3255.43	1.13284	2.51e-07	0.000325008	Up	A2M	ko04610//Complement and coagulation cascades	-	-	-	gi|927132148|ref|XP_013843850.1|/0/PREDICTED: LOW QUALITY PROTEIN: alpha-2-macroglobulin [Sus scrofa]//gi|927132148|ref|XP_013843850.1|/0/PREDICTED: LOW QUALITY PROTEIN: alpha-2-macroglobulin [Sus scrofa]
ENSSSCG00000006793	3323	288.204	1347.9	1.51547	5.25e-08	9.97e-05	Up	-	ko01100//Metabolic pathways;ko00520//Amino sugar and nucleotide sugar metabolism	-	-	-	gi|350583533|ref|XP_003355301.2|/0/PREDICTED: acidic mammalian chitinase-like [Sus scrofa]//gi|350583533|ref|XP_003355301.2|/0/PREDICTED: acidic mammalian chitinase-like [Sus scrofa]//gi|350583533|ref|XP_003355301.2|/1.01303e-161/PREDICTED: acidic mammalian chitinase-like [Sus scrofa]
ENSSSCG00000008769	6334	24.8345	389.638	1.43183	1.17e-05	0.00629936	Up	-	ko04142//Lysosome	GO:0016020//membrane;GO:0043227//membrane-bounded organelle;GO:0043229//intracellular organelle;GO:0044444//cytoplasmic part	-	-	gi|927166229|ref|XP_003128950.2|/0/PREDICTED: macrosialin isoform X2 [Sus scrofa]//gi|927166229|ref|XP_003128950.2|/1.88992e-161/PREDICTED: macrosialin isoform X2 [Sus scrofa]
ENSSSCG00000012202	5391	557.738	1968.3	1.18804	2.75e-05	0.0113501	Up	-	ko01100//Metabolic pathways;ko03320//PPAR signaling pathway;ko00561//Glycerolipid metabolism	GO:0005634//nucleus;GO:0005739//mitochondrion;GO:0005829//cytosol;GO:0070062//extracellular exosome	GO:0004370//glycerol kinase activity	GO:0006071//glycerol metabolic process;GO:0006641//triglyceride metabolic process;GO:0016310//phosphorylation;GO:0019217//regulation of fatty acid metabolic process;GO:0042593//glucose homeostasis;GO:0046167//glycerol-3-phosphate biosynthetic process	gi|927218182|ref|XP_013841484.1|/0/PREDICTED: glycerol kinase isoform X3 [Sus scrofa]//gi|219521986|ref|NP_001137180.1|/0/glycerol kinase [Sus scrofa]//gi|927218186|ref|XP_013841485.1|/0/PREDICTED: glycerol kinase isoform X5 [Sus scrofa]//gi|219521986|ref|NP_001137180.1|/0/glycerol kinase [Sus scrofa]//gi|545884391|ref|XP_005673582.1|/0/PREDICTED: glycerol kinase isoform X8 [Sus scrofa]
ENSSSCG00000013869	7220	181.339	25.7979	-1.61979	8.47e-07	0.000889564	Down	-	ko04610//Complement and coagulation cascades	GO:0005615//extracellular space	GO:0004866//endopeptidase inhibitor activity	GO:0010951//negative regulation of endopeptidase activity	gi|927103335|ref|XP_013850071.1|/0/PREDICTED: C3 and PZP-like alpha-2-macroglobulin domain-containing protein 8 [Sus scrofa]//gi|927103335|ref|XP_013850071.1|/0/PREDICTED: C3 and PZP-like alpha-2-macroglobulin domain-containing protein 8 [Sus scrofa]//gi|927103335|ref|XP_013850071.1|/0/PREDICTED: C3 and PZP-like alpha-2-macroglobulin domain-containing protein 8 [Sus scrofa]//gi|927103335|ref|XP_0…
ENSSSCG00000025644	6441	146.859	1383.36	1.68755	2.1e-07	0.000315248	Up	-	ko04640//Hematopoietic cell lineage;ko05146//Amoebiasis	GO:0005886//plasma membrane;GO:0010008//endosome membrane;GO:0016021//integral component of membrane;GO:0045121//membrane raft	GO:0030881//beta-2-microglobulin binding;GO:0030883//endogenous lipid antigen binding;GO:0030884//exogenous lipid antigen binding;GO:0071723//lipopeptide binding	GO:0002250//adaptive immune response;GO:0048007//antigen processing and presentation, exogenous lipid antigen via MHC class Ib	gi|47523190|ref|NP_998996.1|/0/T-cell surface glycoprotein CD1a precursor [Sus scrofa]//gi|47523190|ref|NP_998996.1|/0/T-cell surface glycoprotein CD1a precursor [Sus scrofa]
ENSSSCG00000031143	1044	17.965	0	-1.14019	0.000159664	0.0399047	Down	-	ko05200//Pathways in cancer;ko04151//PI3K-Akt signaling pathway;ko05206//MicroRNAs in cancer;ko05203//Viral carcinogenesis;ko05222//Small cell lung cancer;ko05161//Hepatitis B;ko05162//Measles;ko05215//Prostate cancer;ko04114//Oocyte meiosis;ko04110//Cell cycle;ko04391//Hippo signaling pathway - fly;ko04115//p53 signaling pathway	GO:0000307//cyclin-dependent protein kinase holoenzyme complex;GO:0005654//nucleoplasm	GO:0016301//kinase activity;GO:0016538//cyclin-dependent protein serine/threonine kinase regulator activity;GO:0019901//protein kinase binding	GO:0000082//G1/S transition of mitotic cell cycle;GO:0006270//DNA replication initiation;GO:0016055//Wnt signaling pathway;GO:0045859//regulation of protein kinase activity;GO:0051726//regulation of cell cycle	gi|545829974|ref|XP_005653322.1|/3.73112e-149/PREDICTED: G1/S-specific cyclin-E1 [Sus scrofa]//gi|545829974|ref|XP_005653322.1|/3.56828e-156/PREDICTED: G1/S-specific cyclin-E1 [Sus scrofa]
ENSSSCG00000032401	6727	1576.37	603.613	-1.12087	0.000168378	0.0410035	Down	-	ko05200//Pathways in cancer;ko04151//PI3K-Akt signaling pathway;ko04015//Rap1 signaling pathway;ko04810//Regulation of actin cytoskeleton;ko04514//Cell adhesion molecules (CAMs);ko05205//Proteoglycans in cancer;ko04145//Phagosome;ko04510//Focal adhesion;ko04360//Axon guidance;ko05169//Epstein-Barr virus infection;ko05414//Dilated cardiomyopathy;ko04670//Leukocyte transendothelial migration;ko0461…	-	-	-	gi|927219524|ref|XP_013846440.1|/0/PREDICTED: collagen alpha-6(IV) chain, partial [Sus scrofa]
ENSSSCG00000033891	2397	2.591	361.681	4.35699	3.98e-50	5.67e-46	Up	-	-	GO:0019005//SCF ubiquitin ligase complex	GO:0001948//glycoprotein binding	-	gi|163310727|ref|NP_001096709.2|/1.842e-81/F-box only protein 17 [Bos taurus]//gi|163310727|ref|NP_001096709.2|/1.842e-81/F-box only protein 17 [Bos taurus]
ENSSSCG00000034817	11925	1733.68	758.843	-1.13345	6.88e-05	0.0226885	Down	-	-	-	-	-	gi|927184872|ref|XP_013835544.1|/0/PREDICTED: LOW QUALITY PROTEIN: protein regulator of cytokinesis 1 [Sus scrofa]//gi|927184872|ref|XP_013835544.1|/0/PREDICTED: LOW QUALITY PROTEIN: protein regulator of cytokinesis 1 [Sus scrofa]//gi|927184872|ref|XP_013835544.1|/0/PREDICTED: LOW QUALITY PROTEIN: protein regulator of cytokinesis 1 [Sus scrofa]
ENSSSCG00000035531	2204	29.9257	585.326	1.82117	3.52e-08	7.16e-05	Up	-	-	GO:0005887//integral component of plasma membrane	GO:0004888//transmembrane signaling receptor activity	GO:0002223//stimulatory C-type lectin receptor signaling pathway;GO:0007155//cell adhesion	gi|586562957|ref|XP_006914732.1|/5.49824e-98/PREDICTED: C-type lectin domain family 4 member A isoform X3 [Pteropus alecto]
MSTRG.11234	2023	72.8954	301.657	1.22872	3.02e-05	0.0122379	Up	-	-	-	-	-	-
MSTRG.11277	8617	682.217	71.4331	-2.44726	6.82e-17	4.86e-13	Down	-	-	-	-	-	-
MSTRG.13100	3859	45.0164	175.39	1.21906	2.54e-05	0.0106405	Up	-	-	-	-	-	-
MSTRG.14236	3259	128.122	716.881	1.49452	1.13e-06	0.00100549	Up	-	-	-	-	-	-
MSTRG.19912	6104	270.212	36.1075	-1.44137	1.28e-05	0.00662584	Down	-	-	-	-	-	-
MSTRG.19941	9199	506.666	48.1192	-1.892	7.43e-09	1.63e-05	Down	-	-	-	-	-	-
MSTRG.19942	20966	1411.44	150.859	-1.98541	7.51e-10	2.67e-06	Down	-	-	-	-	-	-
MSTRG.9492	3730	720.669	3169.2	1.37063	1.95e-06	0.00168471	Up	-	-	-	-	-	-
NONSUSG010039.1	47439	4964.83	457.99	-2.32575	7.19e-14	3.42e-10	Down	-	-	-	-	-	-

## Sheet: Table S5
Table S5.LncRNA differentially expressed in backfat tissue
GeneID	Length	AF-Expression	BF-Expression	log2FoldChange(BF/AF)	Pvalue	Padj	Up/Down-Regulation(BF/AF)	Description	Pathway	GO Component	GO Function	GO Process	Blast nr
MSTRG.12779	2639	10.2669	192.837	1.50603	4.46535e-06	0.00326222	Up	-	-	-	-	-	-
MSTRG.13164	245	32.9318	0.760667	-1.33743	2.11161e-05	0.00970387	Down	-	-	-	-	-	-
MSTRG.14894	798	51.6973	153.714	1.06165	3.16711e-05	0.012533	Up	-	-	-	-	-	-
MSTRG.19914	1921	104.889	11.1374	-1.61573	9.83348e-07	0.000952594	Down	-	-	-	-	-	-
MSTRG.19943	271	83.8257	0	-1.97085	1.55407e-09	4.91982e-06	Down	-	-	-	-	-	-
MSTRG.20066	3137	105.347	11.8387	-1.90218	4.3326e-09	1.0287e-05	Down	-	-	-	-	-	-
MSTRG.6489	809	144.608	37.7209	-1.40796	1.00663e-05	0.00577759	Down	-	-	-	-	-	-
MSTRG.7646	727	546.845	110.882	-1.41334	1.67323e-05	0.00794562	Down	-	-	-	-	-	-
MSTRG.9938	12373	2363.68	11064.8	1.26347	5.57447e-05	0.0200066	Up	-	-	-	-	-	-
NONSUSG000054.1	2701	109.763	17.8001	-1.32347	5.86433e-05	0.0204722	Down	-	-	-	-	-	-
NONSUSG000058.1	2060	24.4652	1.48267	-1.2485	8.22207e-05	0.0257432	Down	-	-	-	-	-	-
NONSUSG000375.1	813	2.66195	60.1735	1.22693	0.000111884	0.0317813	Up	-	-	-	-	-	-
NONSUSG000597.1	712	6.29803	68.01	1.48013	7.33109e-06	0.00453154	Up	-	-	-	-	-	-
NONSUSG001699.2	6121	54.6623	179.401	1.18687	1.0139e-05	0.00577759	Up	-	-	-	-	-	-
NONSUSG010039.1	47439	4964.83	457.99	-2.32575	7.19296e-14	3.4157e-10	Down	-	-	-	-	-	-
NONSUSG011731.1	4334	44.9889	573.577	1.39212	2.3e-05	0.0100818	Up	-	-	-	-	-	-
NONSUSG012255.1	7772	346.836	1159.74	1.21057	3.99278e-06	0.00299375	Up	-	-	-	-	-	-

## Sheet: Table S6
Table S6. Differentially expressed mirnas in backfat tissue
miR_name	A1_F,A4_F,A7_F-Readnum	B1_F,B4_F,B7_F-Readnum	A1_F,A4_F,A7_F-ReadsMean	B1_F,B4_F,B7_F-ReadsMean	log2Ratio(B1_F,B4_F,B7_F/A1_F,A4_F,A7_F) normalized	p-value	q-value(Storey et al. 2003)
ssc-miR-122	10456	29466	3485.33	9822	1.5575	0	0
ssc-miR-451	15229	35546	5076.33	11848.7	1.28564	0	0
ssc-miR-184	1345	4561	448.333	1520.33	1.82452	0	0
ssc-miR-219b-3p	0	218	0	72.6667	8.83096	1.87e-44	2.1e-44
ssc-miR-7135-5p	48	0	16	0	-6.52218	1.48e-12	1.16e-12
ssc-miR-4331	72	164	24	54.6667	1.25041	1.67e-10	1.24e-10
ssc-miR-2366	43	110	14.3333	36.6667	1.41787	8.22e-09	5.81e-09
ssc-miR-133b	154	72	51.3333	24	-1.03408	1.98e-07	1.35e-07
ssc-miR-7139-3p	4	26	1.33333	8.66667	2.76322	1.52e-05	9.75e-06
ssc-miR-135	75	33	25	11	-1.12165	0.000105303	6.43e-05
ssc-miR-124a	1	12	0.333333	4	3.64774	0.00087477	0.000501256
ssc-miR-551a	12	29	4	9.66667	1.3358	0.00468228	0.0025739
ssc-miR-1271	24	8	8	2.66667	-1.52218	0.00547785	0.00297368
ssc-miR-381	18	6	6	2	-1.52218	0.0161553	0.00841567
ssc-miR-7141-5p	3	11	1	3.66667	1.93725	0.022845	0.0117228
ssc-miR-935	7	1	2.33333	0.333333	-2.74458	0.028646	0.0144834
ssc-miR-9820-5p	9	20	3	6.66667	1.21478	0.029175	0.014679
ssc-miR-7138-5p	5	0	1.66667	0	-3.25915	0.0445513	0.0217779
ssc-miR-376a-5p	4	11	1.33333	3.66667	1.52221	0.0546357	0.0264566
ssc-miR-105-2	2	7	0.666667	2.33333	1.87013	0.0761897	0.0355583
novel_mir_255	6613	20081	2204.33	6693.67	1.72483	0	0
novel_mir_618	0	4701	0	1567	13.3211	0	0
novel_mir_300	1574	0	524.667	0	-11.4978	6.13e-196	6.97e-195
novel_mir_359	0	938	0	312.667	10.9958	6.14e-139	5.98e-138
novel_mir_528	0	904	0	301.333	10.9426	3.91e-135	3.33e-134
novel_mir_568	0	859	0	286.333	10.8689	4.89e-130	3.7e-129
novel_mir_63	349	1022	116.333	340.667	1.67247	2.24e-89	1.53e-88
novel_mir_82	428	0	142.667	0	-9.61909	9.4e-73	5.82e-72
novel_mir_108	532	88	177.333	29.3333	-2.47347	3.35e-71	1.91e-70
novel_mir_232	0	371	0	123.667	9.65765	2.15e-68	1.13e-67
novel_mir_363	0	317	0	105.667	9.43072	1.67e-60	8.15e-60
novel_mir_104	769	240	256.333	80	-1.55757	1.87e-56	8.5e-56
novel_mir_219	0	236	0	78.6667	9.00502	5.56e-48	2.37e-47
novel_mir_49	828	312	276	104	-1.28571	7.38e-46	2.96e-45
novel_mir_236	311	48	103.667	16	-2.57343	3.21e-44	1.21e-43
novel_mir_260	150	454	50	151.333	1.72011	2.79e-42	1e-41
novel_mir_103	982	428	327.333	142.667	-1.07574	3.87e-41	1.32e-40
novel_mir_299	192	0	64	0	-8.46259	1.41e-38	4.37e-38
novel_mir_432	0	146	0	48.6667	8.3122	1e-32	2.73e-32
novel_mir_448	0	145	0	48.3333	8.30229	1.52e-32	3.98e-32
novel_mir_163	125	0	41.6667	0	-7.84341	2.96e-27	7.21e-27
novel_mir_173	0	114	0	38	7.95527	8.34e-27	1.96e-26
novel_mir_349	0	113	0	37.6667	7.94256	1.29e-26	2.94e-26
novel_mir_235	32	161	10.6667	53.6667	2.45329	2.15e-24	4.74e-24
novel_mir_160	106	0	35.3333	0	-7.60554	8.09e-24	1.72e-23
novel_mir_512	0	91	0	30.3333	7.63017	2.55e-22	5.1e-22
novel_mir_116	95	0	31.6667	0	-7.44748	9.06e-22	1.76e-21
novel_mir_156	85	0	28.3333	0	-7.28701	7.29e-20	1.38e-19
novel_mir_153	72	0	24	0	-7.04755	2.56e-17	4.6e-17
novel_mir_360	0	62	0	20.6667	7.07657	2.66e-16	4.65e-16
novel_mir_340	0	51	0	17	6.7948	7.04e-14	1.2e-13
novel_mir_175	53	0	17.6667	0	-6.60554	2e-13	3.32e-13
novel_mir_247	0	48	0	16	6.70734	3.35e-13	5.31e-13
novel_mir_90	50	0	16.6667	0	-6.52148	8.65e-13	1.31e-12
novel_mir_410	6	56	2	18.6667	3.34477	2.19e-12	3.24e-12
novel_mir_21	48	0	16	0	-6.46259	2.32e-12	3.36e-12
novel_mir_146	96	20	32	6.66667	-2.14066	3.7e-12	5.14e-12
novel_mir_412	46	0	15.3333	0	-6.40119	6.25e-12	8.52e-12
novel_mir_501	0	40	0	13.3333	6.4443	2.35e-11	3.14e-11
novel_mir_120	119	35	39.6667	11.6667	-1.64316	9.62e-11	1.24e-10
novel_mir_375	0	37	0	12.3333	6.33183	1.2e-10	1.46e-10
novel_mir_344	0	37	0	12.3333	6.33183	1.2e-10	1.46e-10
novel_mir_556	0	37	0	12.3333	6.33183	1.2e-10	1.46e-10
novel_mir_127	40	0	13.3333	0	-6.19955	1.29e-10	1.54e-10
novel_mir_378	0	36	0	12	6.2923	2.08e-10	2.45e-10
novel_mir_43	36	0	12	0	-6.04755	1.01e-09	1.13e-09
novel_mir_257	35	0	11.6667	0	-6.00691	1.7e-09	1.81e-09
novel_mir_311	35	0	11.6667	0	-6.00691	1.7e-09	1.81e-09
novel_mir_303	35	0	11.6667	0	-6.00691	1.7e-09	1.81e-09
novel_mir_509	0	31	0	10.3333	6.07657	3.38e-09	3.49e-09
novel_mir_122	33	0	11	0	-5.92202	4.84e-09	4.85e-09
novel_mir_308	38	98	12.6667	32.6667	1.48916	1.17e-08	1.14e-08
novel_mir_36	30	0	10	0	-5.78451	2.38e-08	2.28e-08
novel_mir_666	0	27	0	9	5.87726	3.31e-08	3.14e-08
novel_mir_489	0	26	0	8.66667	5.82282	5.91e-08	5.23e-08
novel_mir_254	7	41	2.33333	13.6667	2.67257	6.89e-08	6.02e-08
novel_mir_494	0	25	0	8.33333	5.76623	1.06e-07	9.13e-08
novel_mir_506	0	23	0	7.66667	5.64594	3.43e-07	2.92e-07
novel_mir_438	0	22	0	7.33333	5.58181	6.21e-07	5.16e-07
novel_mir_502	0	22	0	7.33333	5.58181	6.21e-07	5.16e-07
novel_mir_165	23	0	7.66667	0	-5.40119	1.08e-06	8.73e-07
novel_mir_204	0	21	0	7	5.51469	1.13e-06	8.95e-07
novel_mir_386	0	21	0	7	5.51469	1.13e-06	8.95e-07
novel_mir_273	68	126	22.6667	42	1.01219	1.79e-06	1.39e-06
novel_mir_62	22	0	7.33333	0	-5.33706	1.88e-06	1.44e-06
novel_mir_225	0	20	0	6.66667	5.4443	2.06e-06	1.46e-06
novel_mir_261	0	20	0	6.66667	5.4443	2.06e-06	1.46e-06
novel_mir_208	0	20	0	6.66667	5.4443	2.06e-06	1.46e-06
novel_mir_503	0	20	0	6.66667	5.4443	2.06e-06	1.46e-06
novel_mir_524	0	20	0	6.66667	5.4443	2.06e-06	1.46e-06
novel_mir_623	0	20	0	6.66667	5.4443	2.06e-06	1.46e-06
novel_mir_637	0	20	0	6.66667	5.4443	2.06e-06	1.46e-06
novel_mir_313	31	74	10.3333	24.6667	1.37763	2.94e-06	2.04e-06
novel_mir_121	19	54	6.33333	18	1.62934	6.13e-06	4.22e-06
novel_mir_253	6	31	2	10.3333	2.49161	6.42e-06	4.38e-06
novel_mir_200	0	18	0	6	5.2923	6.96e-06	4.65e-06
novel_mir_437	0	18	0	6	5.2923	6.96e-06	4.65e-06
novel_mir_252	0	16	0	5.33333	5.12238	2.4e-05	1.54e-05
novel_mir_198	17	0	5.66667	0	-4.96509	3.22e-05	2.05e-05
novel_mir_495	0	15	0	5	5.02927	4.48e-05	2.7e-05
novel_mir_504	0	15	0	5	5.02927	4.48e-05	2.7e-05
novel_mir_555	0	15	0	5	5.02927	4.48e-05	2.7e-05
novel_mir_573	0	15	0	5	5.02927	4.48e-05	2.7e-05
novel_mir_625	0	15	0	5	5.02927	4.48e-05	2.7e-05
novel_mir_665	0	15	0	5	5.02927	4.48e-05	2.7e-05
novel_mir_75	31	6	10.3333	2	-2.24686	4.73e-05	2.83e-05
novel_mir_230	16	0	5.33333	0	-4.87762	5.76e-05	3.36e-05
novel_mir_322	16	0	5.33333	0	-4.87762	5.76e-05	3.36e-05
novel_mir_109	14	41	4.66667	13.6667	1.67257	5.96e-05	3.44e-05
novel_mir_249	0	14	0	4.66667	4.92973	8.43e-05	4.6e-05
novel_mir_338	0	14	0	4.66667	4.92973	8.43e-05	4.6e-05
novel_mir_376	0	14	0	4.66667	4.92973	8.43e-05	4.6e-05
novel_mir_450	0	14	0	4.66667	4.92973	8.43e-05	4.6e-05
novel_mir_499	0	14	0	4.66667	4.92973	8.43e-05	4.6e-05
novel_mir_567	0	14	0	4.66667	4.92973	8.43e-05	4.6e-05
novel_mir_664	0	14	0	4.66667	4.92973	8.43e-05	4.6e-05
novel_mir_55	15	0	5	0	-4.78451	0.000103397	5.55e-05
novel_mir_325	15	0	5	0	-4.78451	0.000103397	5.55e-05
novel_mir_368	0	13	0	4.33333	4.82282	0.00015935	8.17e-05
novel_mir_469	0	13	0	4.33333	4.82282	0.00015935	8.17e-05
novel_mir_647	0	13	0	4.33333	4.82282	0.00015935	8.17e-05
novel_mir_209	6	25	2	8.33333	2.18127	0.000181714	9.11e-05
novel_mir_282	6	25	2	8.33333	2.18127	0.000181714	9.11e-05
novel_mir_407	14	0	4.66667	0	-4.68498	0.000186452	9.28e-05
novel_mir_239	0	12	0	4	4.70734	0.000303148	0.000146594
novel_mir_342	0	12	0	4	4.70734	0.000303148	0.000146594
novel_mir_486	0	12	0	4	4.70734	0.000303148	0.000146594
novel_mir_621	0	12	0	4	4.70734	0.000303148	0.000146594
novel_mir_171	13	0	4.33333	0	-4.57806	0.000337858	0.000159975
novel_mir_296	13	0	4.33333	0	-4.57806	0.000337858	0.000159975
novel_mir_414	13	0	4.33333	0	-4.57806	0.000337858	0.000159975
novel_mir_206	0	11	0	3.66667	4.58181	0.000580437	0.000269227
novel_mir_195	0	11	0	3.66667	4.58181	0.000580437	0.000269227
novel_mir_33	12	0	4	0	-4.46259	0.000615338	0.000281584
novel_mir_276	12	0	4	0	-4.46259	0.000615338	0.000281584
novel_mir_256	13	34	4.33333	11.3333	1.5094	0.000689661	0.000311415
novel_mir_201	0	10	0	3.33333	4.4443	0.00111901	0.00048016
novel_mir_332	0	10	0	3.33333	4.4443	0.00111901	0.00048016
novel_mir_371	0	10	0	3.33333	4.4443	0.00111901	0.00048016
novel_mir_451	0	10	0	3.33333	4.4443	0.00111901	0.00048016
novel_mir_649	0	10	0	3.33333	4.4443	0.00111901	0.00048016
novel_mir_92	11	0	3.66667	0	-4.33706	0.00112674	0.00048016
novel_mir_250	11	0	3.66667	0	-4.33706	0.00112674	0.00048016
novel_mir_315	11	0	3.66667	0	-4.33706	0.00112674	0.00048016
novel_mir_409	7	23	2.33333	7.66667	1.83858	0.00132081	0.000559366
novel_mir_6	33	11	11	3.66667	-1.46259	0.00174543	0.00073012
novel_mir_242	8	24	2.66667	8	1.70734	0.00183077	0.000761153
novel_mir_70	10	0	3.33333	0	-4.19955	0.00207491	0.000823193
novel_mir_24	10	0	3.33333	0	-4.19955	0.00207491	0.000823193
novel_mir_287	10	0	3.33333	0	-4.19955	0.00207491	0.000823193
novel_mir_408	10	0	3.33333	0	-4.19955	0.00207491	0.000823193
novel_mir_417	10	0	3.33333	0	-4.19955	0.00207491	0.000823193
novel_mir_424	10	0	3.33333	0	-4.19955	0.00207491	0.000823193
novel_mir_213	0	9	0	3	4.2923	0.00217317	0.000823193
novel_mir_196	0	9	0	3	4.2923	0.00217317	0.000823193
novel_mir_336	0	9	0	3	4.2923	0.00217317	0.000823193
novel_mir_348	0	9	0	3	4.2923	0.00217317	0.000823193
novel_mir_462	0	9	0	3	4.2923	0.00217317	0.000823193
novel_mir_507	0	9	0	3	4.2923	0.00217317	0.000823193
novel_mir_488	0	9	0	3	4.2923	0.00217317	0.000823193
novel_mir_493	0	9	0	3	4.2923	0.00217317	0.000823193
novel_mir_575	0	9	0	3	4.2923	0.00217317	0.000823193
novel_mir_89	25	7	8.33333	2.33333	-1.71412	0.00223493	0.000841909
novel_mir_237	5	18	1.66667	6	1.97037	0.00292146	0.00108259
novel_mir_12	46	20	15.3333	6.66667	-1.07926	0.00356129	0.00130549
novel_mir_4	20	5	6.66667	1.66667	-1.87762	0.00359709	0.00131157
novel_mir_113	9	0	3	0	-4.04755	0.003844	0.00135102
novel_mir_31	9	0	3	0	-4.04755	0.003844	0.00135102
novel_mir_318	9	0	3	0	-4.04755	0.003844	0.00135102
novel_mir_301	9	0	3	0	-4.04755	0.003844	0.00135102
novel_mir_312	9	0	3	0	-4.04755	0.003844	0.00135102
novel_mir_396	9	0	3	0	-4.04755	0.003844	0.00135102
novel_mir_415	9	0	3	0	-4.04755	0.003844	0.00135102
novel_mir_190	0	8	0	2.66667	4.12238	0.00425381	0.00140116
novel_mir_487	0	8	0	2.66667	4.12238	0.00425381	0.00140116
novel_mir_496	0	8	0	2.66667	4.12238	0.00425381	0.00140116
novel_mir_508	0	8	0	2.66667	4.12238	0.00425381	0.00140116
novel_mir_542	0	8	0	2.66667	4.12238	0.00425381	0.00140116
novel_mir_551	0	8	0	2.66667	4.12238	0.00425381	0.00140116
novel_mir_569	0	8	0	2.66667	4.12238	0.00425381	0.00140116
novel_mir_624	0	8	0	2.66667	4.12238	0.00425381	0.00140116
novel_mir_635	0	8	0	2.66667	4.12238	0.00425381	0.00140116
novel_mir_636	0	8	0	2.66667	4.12238	0.00425381	0.00140116
novel_mir_644	0	8	0	2.66667	4.12238	0.00425381	0.00140116
novel_mir_646	0	8	0	2.66667	4.12238	0.00425381	0.00140116
novel_mir_663	0	8	0	2.66667	4.12238	0.00425381	0.00140116
novel_mir_131	8	22	2.66667	7.33333	1.58181	0.00472607	0.00154924
novel_mir_45	43	19	14.3333	6.33333	-1.05596	0.00563506	0.00182962
novel_mir_170	6	18	2	6	1.70734	0.00695745	0.00220914
novel_mir_93	8	0	2.66667	0	-3.87762	0.00716721	0.00220914
novel_mir_81	8	0	2.66667	0	-3.87762	0.00716721	0.00220914
novel_mir_321	8	0	2.66667	0	-3.87762	0.00716721	0.00220914
novel_mir_374	8	0	2.66667	0	-3.87762	0.00716721	0.00220914
novel_mir_422	8	0	2.66667	0	-3.87762	0.00716721	0.00220914
novel_mir_387	8	0	2.66667	0	-3.87762	0.00716721	0.00220914
novel_mir_406	8	0	2.66667	0	-3.87762	0.00716721	0.00220914
novel_mir_426	8	0	2.66667	0	-3.87762	0.00716721	0.00220914
novel_mir_413	8	0	2.66667	0	-3.87762	0.00716721	0.00220914
novel_mir_42	8	21	2.66667	7	1.51469	0.00749552	0.00228158
novel_mir_223	8	21	2.66667	7	1.51469	0.00749552	0.00228158
novel_mir_226	15	31	5	10.3333	1.16968	0.00773513	0.00234405
novel_mir_111	22	7	7.33333	2.33333	-1.5297	0.00823281	0.00235639
novel_mir_107	5	16	1.66667	5.33333	1.80045	0.00828228	0.00235639
novel_mir_240	0	7	0	2.33333	3.92973	0.00839792	0.00235639
novel_mir_233	0	7	0	2.33333	3.92973	0.00839792	0.00235639
novel_mir_381	0	7	0	2.33333	3.92973	0.00839792	0.00235639
novel_mir_439	0	7	0	2.33333	3.92973	0.00839792	0.00235639
novel_mir_452	0	7	0	2.33333	3.92973	0.00839792	0.00235639
novel_mir_490	0	7	0	2.33333	3.92973	0.00839792	0.00235639
novel_mir_492	0	7	0	2.33333	3.92973	0.00839792	0.00235639
novel_mir_518	0	7	0	2.33333	3.92973	0.00839792	0.00235639
novel_mir_549	0	7	0	2.33333	3.92973	0.00839792	0.00235639
novel_mir_550	0	7	0	2.33333	3.92973	0.00839792	0.00235639
novel_mir_557	0	7	0	2.33333	3.92973	0.00839792	0.00235639
novel_mir_559	0	7	0	2.33333	3.92973	0.00839792	0.00235639
novel_mir_565	0	7	0	2.33333	3.92973	0.00839792	0.00235639
novel_mir_660	0	7	0	2.33333	3.92973	0.00839792	0.00235639
novel_mir_645	0	7	0	2.33333	3.92973	0.00839792	0.00235639
novel_mir_650	0	7	0	2.33333	3.92973	0.00839792	0.00235639
novel_mir_152	28	11	9.33333	3.66667	-1.22555	0.011818	0.00328896
novel_mir_136	7	0	2.33333	0	-3.68498	0.0134553	0.00356979
novel_mir_134	7	0	2.33333	0	-3.68498	0.0134553	0.00356979
novel_mir_20	7	0	2.33333	0	-3.68498	0.0134553	0.00356979
novel_mir_94	7	0	2.33333	0	-3.68498	0.0134553	0.00356979
novel_mir_280	7	0	2.33333	0	-3.68498	0.0134553	0.00356979
novel_mir_298	7	0	2.33333	0	-3.68498	0.0134553	0.00356979
novel_mir_317	7	0	2.33333	0	-3.68498	0.0134553	0.00356979
novel_mir_423	7	0	2.33333	0	-3.68498	0.0134553	0.00356979
novel_mir_389	7	0	2.33333	0	-3.68498	0.0134553	0.00356979
novel_mir_393	7	0	2.33333	0	-3.68498	0.0134553	0.00356979
novel_mir_398	7	0	2.33333	0	-3.68498	0.0134553	0.00356979
novel_mir_399	7	0	2.33333	0	-3.68498	0.0134553	0.00356979
novel_mir_202	0	6	0	2	3.70734	0.0167349	0.00401777
novel_mir_241	0	6	0	2	3.70734	0.0167349	0.00401777
novel_mir_343	0	6	0	2	3.70734	0.0167349	0.00401777
novel_mir_443	0	6	0	2	3.70734	0.0167349	0.00401777
novel_mir_510	0	6	0	2	3.70734	0.0167349	0.00401777
novel_mir_483	0	6	0	2	3.70734	0.0167349	0.00401777
novel_mir_478	0	6	0	2	3.70734	0.0167349	0.00401777
novel_mir_497	0	6	0	2	3.70734	0.0167349	0.00401777
novel_mir_505	0	6	0	2	3.70734	0.0167349	0.00401777
novel_mir_513	0	6	0	2	3.70734	0.0167349	0.00401777
novel_mir_548	0	6	0	2	3.70734	0.0167349	0.00401777
novel_mir_558	0	6	0	2	3.70734	0.0167349	0.00401777
novel_mir_562	0	6	0	2	3.70734	0.0167349	0.00401777
novel_mir_564	0	6	0	2	3.70734	0.0167349	0.00401777
novel_mir_572	0	6	0	2	3.70734	0.0167349	0.00401777
novel_mir_607	0	6	0	2	3.70734	0.0167349	0.00401777
novel_mir_608	0	6	0	2	3.70734	0.0167349	0.00401777
novel_mir_628	0	6	0	2	3.70734	0.0167349	0.00401777
novel_mir_630	0	6	0	2	3.70734	0.0167349	0.00401777
novel_mir_631	0	6	0	2	3.70734	0.0167349	0.00401777
novel_mir_633	0	6	0	2	3.70734	0.0167349	0.00401777
novel_mir_634	0	6	0	2	3.70734	0.0167349	0.00401777
novel_mir_640	0	6	0	2	3.70734	0.0167349	0.00401777
novel_mir_651	0	6	0	2	3.70734	0.0167349	0.00401777
novel_mir_655	0	6	0	2	3.70734	0.0167349	0.00401777
novel_mir_657	0	6	0	2	3.70734	0.0167349	0.00401777
novel_mir_658	0	6	0	2	3.70734	0.0167349	0.00401777
novel_mir_316	16	5	5.33333	1.66667	-1.5557	0.0225241	0.00529953
novel_mir_293	7	17	2.33333	5.66667	1.40248	0.0231234	0.005418
novel_mir_69	6	0	2	0	-3.46259	0.025448	0.00559723
novel_mir_125	6	0	2	0	-3.46259	0.025448	0.00559723
novel_mir_126	6	0	2	0	-3.46259	0.025448	0.00559723
novel_mir_130	6	0	2	0	-3.46259	0.025448	0.00559723
novel_mir_154	6	0	2	0	-3.46259	0.025448	0.00559723
novel_mir_18	6	0	2	0	-3.46259	0.025448	0.00559723
novel_mir_19	6	0	2	0	-3.46259	0.025448	0.00559723
novel_mir_64	6	0	2	0	-3.46259	0.025448	0.00559723
novel_mir_72	6	0	2	0	-3.46259	0.025448	0.00559723
novel_mir_193	6	0	2	0	-3.46259	0.025448	0.00559723
novel_mir_275	6	0	2	0	-3.46259	0.025448	0.00559723
novel_mir_281	6	0	2	0	-3.46259	0.025448	0.00559723
novel_mir_297	6	0	2	0	-3.46259	0.025448	0.00559723
novel_mir_304	6	0	2	0	-3.46259	0.025448	0.00559723
novel_mir_310	6	0	2	0	-3.46259	0.025448	0.00559723
novel_mir_329	6	0	2	0	-3.46259	0.025448	0.00559723
novel_mir_403	6	0	2	0	-3.46259	0.025448	0.00559723
novel_mir_418	6	0	2	0	-3.46259	0.025448	0.00559723
novel_mir_420	6	0	2	0	-3.46259	0.025448	0.00559723
novel_mir_39	6	15	2	5	1.4443	0.0291572	0.00629449
novel_mir_176	0	5	0	1.66667	3.4443	0.0336955	0.00629449
novel_mir_244	0	5	0	1.66667	3.4443	0.0336955	0.00629449
novel_mir_352	0	5	0	1.66667	3.4443	0.0336955	0.00629449
novel_mir_453	0	5	0	1.66667	3.4443	0.0336955	0.00629449
novel_mir_477	0	5	0	1.66667	3.4443	0.0336955	0.00629449
novel_mir_479	0	5	0	1.66667	3.4443	0.0336955	0.00629449
novel_mir_480	0	5	0	1.66667	3.4443	0.0336955	0.00629449
novel_mir_481	0	5	0	1.66667	3.4443	0.0336955	0.00629449
novel_mir_482	0	5	0	1.66667	3.4443	0.0336955	0.00629449
novel_mir_484	0	5	0	1.66667	3.4443	0.0336955	0.00629449
novel_mir_485	0	5	0	1.66667	3.4443	0.0336955	0.00629449
novel_mir_491	0	5	0	1.66667	3.4443	0.0336955	0.00629449
novel_mir_498	0	5	0	1.66667	3.4443	0.0336955	0.00629449
novel_mir_500	0	5	0	1.66667	3.4443	0.0336955	0.00629449
novel_mir_511	0	5	0	1.66667	3.4443	0.0336955	0.00629449
novel_mir_514	0	5	0	1.66667	3.4443	0.0336955	0.00629449
novel_mir_544	0	5	0	1.66667	3.4443	0.0336955	0.00629449
novel_mir_554	0	5	0	1.66667	3.4443	0.0336955	0.00629449
novel_mir_545	0	5	0	1.66667	3.4443	0.0336955	0.00629449
novel_mir_546	0	5	0	1.66667	3.4443	0.0336955	0.00629449
novel_mir_547	0	5	0	1.66667	3.4443	0.0336955	0.00629449
novel_mir_552	0	5	0	1.66667	3.4443	0.0336955	0.00629449
novel_mir_553	0	5	0	1.66667	3.4443	0.0336955	0.00629449
novel_mir_560	0	5	0	1.66667	3.4443	0.0336955	0.00629449
novel_mir_561	0	5	0	1.66667	3.4443	0.0336955	0.00629449
novel_mir_563	0	5	0	1.66667	3.4443	0.0336955	0.00629449
novel_mir_566	0	5	0	1.66667	3.4443	0.0336955	0.00629449
novel_mir_570	0	5	0	1.66667	3.4443	0.0336955	0.00629449
novel_mir_571	0	5	0	1.66667	3.4443	0.0336955	0.00629449
novel_mir_574	0	5	0	1.66667	3.4443	0.0336955	0.00629449
novel_mir_576	0	5	0	1.66667	3.4443	0.0336955	0.00629449
novel_mir_656	0	5	0	1.66667	3.4443	0.0336955	0.00629449
novel_mir_654	0	5	0	1.66667	3.4443	0.0336955	0.00629449
novel_mir_639	0	5	0	1.66667	3.4443	0.0336955	0.00629449
novel_mir_620	0	5	0	1.66667	3.4443	0.0336955	0.00629449
novel_mir_622	0	5	0	1.66667	3.4443	0.0336955	0.00629449
novel_mir_626	0	5	0	1.66667	3.4443	0.0336955	0.00629449
novel_mir_627	0	5	0	1.66667	3.4443	0.0336955	0.00629449
novel_mir_629	0	5	0	1.66667	3.4443	0.0336955	0.00629449
novel_mir_632	0	5	0	1.66667	3.4443	0.0336955	0.00629449
novel_mir_638	0	5	0	1.66667	3.4443	0.0336955	0.00629449
novel_mir_641	0	5	0	1.66667	3.4443	0.0336955	0.00629449
novel_mir_642	0	5	0	1.66667	3.4443	0.0336955	0.00629449
novel_mir_643	0	5	0	1.66667	3.4443	0.0336955	0.00629449
novel_mir_648	0	5	0	1.66667	3.4443	0.0336955	0.00629449
novel_mir_652	0	5	0	1.66667	3.4443	0.0336955	0.00629449
novel_mir_653	0	5	0	1.66667	3.4443	0.0336955	0.00629449
novel_mir_659	0	5	0	1.66667	3.4443	0.0336955	0.00629449
novel_mir_661	0	5	0	1.66667	3.4443	0.0336955	0.00629449
novel_mir_662	0	5	0	1.66667	3.4443	0.0336955	0.00629449
novel_mir_285	5	13	1.66667	4.33333	1.50089	0.036645	0.00682677
novel_mir_123	21	9	7	3	-1.10002	0.0455044	0.00827068
novel_mir_59	5	0	1.66667	0	-3.19955	0.0485199	0.00827068
novel_mir_53	5	0	1.66667	0	-3.19955	0.0485199	0.00827068
novel_mir_10	5	0	1.66667	0	-3.19955	0.0485199	0.00827068
novel_mir_41	5	0	1.66667	0	-3.19955	0.0485199	0.00827068
novel_mir_68	5	0	1.66667	0	-3.19955	0.0485199	0.00827068
novel_mir_8	5	0	1.66667	0	-3.19955	0.0485199	0.00827068
novel_mir_88	5	0	1.66667	0	-3.19955	0.0485199	0.00827068
novel_mir_217	5	0	1.66667	0	-3.19955	0.0485199	0.00827068
novel_mir_191	5	0	1.66667	0	-3.19955	0.0485199	0.00827068
novel_mir_279	5	0	1.66667	0	-3.19955	0.0485199	0.00827068
novel_mir_283	5	0	1.66667	0	-3.19955	0.0485199	0.00827068
novel_mir_284	5	0	1.66667	0	-3.19955	0.0485199	0.00827068
novel_mir_288	5	0	1.66667	0	-3.19955	0.0485199	0.00827068
novel_mir_289	5	0	1.66667	0	-3.19955	0.0485199	0.00827068
novel_mir_290	5	0	1.66667	0	-3.19955	0.0485199	0.00827068
novel_mir_292	5	0	1.66667	0	-3.19955	0.0485199	0.00827068
novel_mir_295	5	0	1.66667	0	-3.19955	0.0485199	0.00827068
novel_mir_305	5	0	1.66667	0	-3.19955	0.0485199	0.00827068
novel_mir_307	5	0	1.66667	0	-3.19955	0.0485199	0.00827068
novel_mir_324	5	0	1.66667	0	-3.19955	0.0485199	0.00827068
novel_mir_346	5	0	1.66667	0	-3.19955	0.0485199	0.00827068
novel_mir_404	5	0	1.66667	0	-3.19955	0.0485199	0.00827068
novel_mir_388	5	0	1.66667	0	-3.19955	0.0485199	0.00827068
novel_mir_390	5	0	1.66667	0	-3.19955	0.0485199	0.00827068
novel_mir_391	5	0	1.66667	0	-3.19955	0.0485199	0.00827068
novel_mir_395	5	0	1.66667	0	-3.19955	0.0485199	0.00827068
novel_mir_397	5	0	1.66667	0	-3.19955	0.0485199	0.00827068
novel_mir_400	5	0	1.66667	0	-3.19955	0.0485199	0.00827068
novel_mir_411	5	0	1.66667	0	-3.19955	0.0485199	0.00827068
novel_mir_419	5	12	1.66667	4	1.38541	0.0586642	0.00992542
novel_mir_78	17	7	5.66667	2.33333	-1.15773	0.0607926	0.0102601
novel_mir_138	8	16	2.66667	5.33333	1.12238	0.064144	0.0107459
novel_mir_207	8	16	2.66667	5.33333	1.12238	0.064144	0.0107459
novel_mir_286	9	17	3	5.66667	1.03991	0.0729087	0.0121249
novel_mir_272	11	5	3.66667	1.66667	-1.01513	0.17524	0.0281142
novel_mir_354	11	5	3.66667	1.66667	-1.01513	0.17524	0.0281142

## Sheet: Table S7
Table S7.MRNA differentially expressed in abdominal adipose tissue
GeneID	Length	ALF-Expression	BLF-Expression	log2FoldChange(BLF/ALF)	Pvalue	Padj	Up/Down-Regulation(BLF/ALF)	Description	Pathway	GO Component	GO Function	GO Process	Blast nr
ENSSSCG00000022467	640	6.12137	36.0536	1.3416	0.000350384	0.0380777	Up	VPREB1	-	-	-	-	gi|115432060|ref|NP_001068585.1|/1.14813e-82/VpreB protein precursor [Sus scrofa]
ENSSSCG00000010276	3565	1318.16	534.391	-1.00332	0.000312515	0.034491	Down	UNC5B	ko04360//Axon guidance	GO:0005886//plasma membrane;GO:0016021//integral component of membrane;GO:0045121//membrane raft	GO:0005515//protein binding	GO:0001525//angiogenesis;GO:0014068//positive regulation of phosphatidylinositol 3-kinase signaling;GO:0033564//anterior/posterior axon guidance;GO:0043524//negative regulation of neuron apoptotic process;GO:2001240//negative regulation of extrinsic apoptotic signaling pathway in absence of ligand	gi|113205640|ref|NP_001038014.1|/0/netrin receptor UNC5B precursor [Sus scrofa]//gi|113205640|ref|NP_001038014.1|/0/netrin receptor UNC5B precursor [Sus scrofa]
ENSSSCG00000004614	8330	154.017	21.4599	-1.3483	0.000336435	0.0367025	Down	UNC13C	ko04721//Synaptic vesicle cycle	GO:0005622//intracellular	GO:0019992//diacylglycerol binding;GO:0046872//metal ion binding	GO:0007268//synaptic transmission;GO:0035556//intracellular signal transduction	gi|743746236|ref|XP_010967789.1|/0/PREDICTED: protein unc-13 homolog C isoform X1 [Camelus bactrianus]//gi|743746236|ref|XP_010967789.1|/0/PREDICTED: protein unc-13 homolog C isoform X1 [Camelus bactrianus]//gi|743746236|ref|XP_010967789.1|/0/PREDICTED: protein unc-13 homolog C isoform X1 [Camelus bactrianus]
ENSSSCG00000035825	5113	65.6678	265.443	1.53564	6.99e-06	0.00207471	Up	UBE2QL1	ko04120//Ubiquitin mediated proteolysis	GO:0005634//nucleus	GO:0005515//protein binding;GO:0005524//ATP binding;GO:0061631//ubiquitin conjugating enzyme activity	GO:0016567//protein ubiquitination	gi|223555979|ref|NP_001138633.1|/7.1189e-115/1
ENSSSCG00000039862	4931	665.949	2319.96	1.27801	0.000464417	0.0457386	Up	TRIB3	ko04931//Insulin resistance	GO:0031981//nuclear lumen	GO:0030234//enzyme regulator activity;GO:0031434//mitogen-activated protein kinase kinase binding	GO:0032436//positive regulation of proteasomal ubiquitin-dependent protein catabolic process;GO:0043405//regulation of MAP kinase activity;GO:0044093;GO:0045892//negative regulation of transcription, DNA-templated;GO:0070059//intrinsic apoptotic signaling pathway in response to endoplasmic reticulum stress	gi|115497954|ref|NP_001069571.1|/0/tribbles homolog 3 [Bos taurus]//gi|115497954|ref|NP_001069571.1|/0/tribbles homolog 3 [Bos taurus]
ENSSSCG00000028204	2608	12.6132	194.942	2.01605	7.51e-08	4.95e-05	Up	TREH	ko01100//Metabolic pathways;ko00500//Starch and sucrose metabolism	GO:0046658//anchored component of plasma membrane;GO:0070062//extracellular exosome	GO:0004555//alpha,alpha-trehalase activity	GO:0005993//trehalose catabolic process;GO:0009887//organ morphogenesis	gi|296480197|tpg|DAA22312.1|/0/TPA: trehalase (brush-border membrane glycoprotein) [Bos taurus]
ENSSSCG00000011812	1113	114.327	38.7673	-1.09115	0.000503839	0.0487744	Down	TPRG1	-	GO:0005737//cytoplasm	-	-	gi|927201935|ref|XP_013837732.1|/0/PREDICTED: tumor protein p63-regulated gene 1 protein isoform X2 [Sus scrofa]
ENSSSCG00000036521	2371	38.734	137.499	1.33768	0.000132425	0.0195147	Up	TNFSF13	ko04060//Cytokine-cytokine receptor interaction;ko05323//Rheumatoid arthritis;ko04672//Intestinal immune network for IgA production	GO:0005615//extracellular space;GO:0005737//cytoplasm;GO:0016021//integral component of membrane;GO:0070062//extracellular exosome	GO:0005125//cytokine activity;GO:0005164//tumor necrosis factor receptor binding	GO:0048298//positive regulation of isotype switching to IgA isotypes	gi|162951811|ref|NP_001106160.1|/1.01942e-156/tumor necrosis factor ligand superfamily member 13 [Sus scrofa]//gi|162951811|ref|NP_001106160.1|/7.57776e-141/tumor necrosis factor ligand superfamily member 13 [Sus scrofa]
ENSSSCG00000007560	5820	86.2346	206.762	1.19567	1.04e-05	0.00287751	Up	TMEM184A	ko04976//Bile secretion	GO:0016021//integral component of membrane;GO:0031901//early endosome membrane	GO:0005215//transporter activity	GO:0006810//transport	gi|335283953|ref|XP_003124309.2|/0/PREDICTED: transmembrane protein 184A isoform X3 [Sus scrofa]
ENSSSCG00000008150	3677	1216.49	2678.72	1.18488	1.25e-07	7.4e-05	Up	TMEM182	-	GO:0016021//integral component of membrane	GO:0005515//protein binding	-	gi|332251592|ref|XP_003274931.1|/1.29007e-139/1//gi|332251592|ref|XP_003274931.1|/1.29007e-139/1
ENSSSCG00000032327	3077	49.7157	138.858	1.24552	0.000128792	0.0192266	Up	TMEM169	-	GO:0016021//integral component of membrane	-	-	gi|927211315|ref|XP_005672233.2|/0/PREDICTED: transmembrane protein 169 [Sus scrofa]
ENSSSCG00000001535	3214	9.78232	110.344	1.92705	2.37e-07	0.000124708	Up	TCP11	-	-	-	-	gi|927156250|ref|XP_013833254.1|/0/PREDICTED: T-complex protein 11 homolog isoform X1 [Sus scrofa]//gi|528764593|gb|EPY84252.1|/0/t-complex 11-like protein [Camelus ferus]
ENSSSCG00000009865	6449	1938.66	761.105	-1.05222	2.77e-06	0.000970167	Down	TBX3	ko04550//Signaling pathways regulating pluripotency of stem cells	GO:0005634//nucleus	GO:0003677//DNA binding;GO:0003700//transcription factor activity, sequence-specific DNA binding	GO:0006355//regulation of transcription, DNA-templated	gi|194043003|ref|XP_001928032.1|/0/PREDICTED: T-box transcription factor TBX3 isoform X2 [Sus scrofa]//gi|194043005|ref|XP_001928037.1|/0/PREDICTED: T-box transcription factor TBX3 isoform X1 [Sus scrofa]
ENSSSCG00000032374	5160	888.902	183.729	-1.29728	0.000374965	0.0393908	Down	SULT1B1	-	GO:0005737//cytoplasm	GO:0004062//aryl sulfotransferase activity	GO:0006805//xenobiotic metabolic process;GO:0008202//steroid metabolic process;GO:0009812//flavonoid metabolic process;GO:0030855//epithelial cell differentiation;GO:0042403//thyroid hormone metabolic process;GO:0051923//sulfation	gi|545845305|ref|XP_005656568.1|/0/PREDICTED: sulfotransferase family cytosolic 1B member 1 [Sus scrofa]
ENSSSCG00000039782	5766	1.82055	61.7647	1.3762	0.000131006	0.0194548	Up	STOML2	ko04120//Ubiquitin mediated proteolysis;ko04110//Cell cycle;ko04914//Progesterone-mediated oocyte maturation	GO:0001772//immunological synapse;GO:0005743//mitochondrial inner membrane;GO:0005758//mitochondrial intermembrane space;GO:0008180//COP9 signalosome;GO:0015629//actin cytoskeleton;GO:0019897//extrinsic component of plasma membrane;GO:0042101//T cell receptor complex;GO:0045121//membrane raft	GO:0051020//GTPase binding;GO:1901612//cardiolipin binding	GO:0006851//mitochondrial calcium ion transport;GO:0006874//cellular calcium ion homeostasis;GO:0010876//lipid localization;GO:0010918//positive regulation of mitochondrial membrane potential;GO:0032623//interleukin-2 production;GO:0034982//mitochondrial protein processing;GO:0035710//CD4-positive, alpha-beta T cell activation;GO:0042776//mitochondrial ATP synthesis coupled proton transport;GO:00…	gi|594081554|ref|XP_006064391.1|/0/PREDICTED: stomatin-like protein 2, mitochondrial [Bubalus bubalis]
ENSSSCG00000034942	6018	364.724	42.3148	-1.69972	4.6e-06	0.00148272	Down	STAR	ko04925//Aldosterone synthesis and secretion;ko04913//Ovarian steroidogenesis	GO:0005758//mitochondrial intermembrane space;GO:0005789//endoplasmic reticulum membrane;GO:0005886//plasma membrane;GO:0008074//guanylate cyclase complex, soluble;GO:0016021//integral component of membrane;GO:0030061//mitochondrial crista;GO:0043005//neuron projection;GO:0043025//neuronal cell body	GO:0004016//adenylate cyclase activity;GO:0004383//guanylate cyclase activity;GO:0004672//protein kinase activity;GO:0005515//protein binding;GO:0005524//ATP binding;GO:0005525//GTP binding;GO:0015485//cholesterol binding;GO:0015643//toxic substance binding;GO:0017127//cholesterol transporter activity	GO:0006182//cGMP biosynthetic process;GO:0006468//protein phosphorylation;GO:0006699//bile acid biosynthetic process;GO:0006701//progesterone biosynthetic process;GO:0006703//estrogen biosynthetic process;GO:0007168//receptor guanylyl cyclase signaling pathway;GO:0007420//brain development;GO:0007584//response to nutrient;GO:0008203//cholesterol metabolic process;GO:0008211//glucocorticoid metabo…	gi|56711334|ref|NP_998920.2|/5.05241e-176/steroidogenic acute regulatory protein, mitochondrial precursor [Sus scrofa]//gi|56711334|ref|NP_998920.2|/0/steroidogenic acute regulatory protein, mitochondrial precursor [Sus scrofa]
ENSSSCG00000038508	8585	52.876	309.664	1.78703	6.5e-07	0.000288101	Up	SPTBN2	ko04530//Tight junction	-	-	-	gi|560976907|ref|XP_006210738.1|/0/PREDICTED: spectrin beta chain, non-erythrocytic 2 isoform X4 [Vicugna pacos]//gi|970730204|ref|XP_015100236.1|/0/PREDICTED: spectrin beta chain, non-erythrocytic 2 isoform X2 [Vicugna pacos]//gi|560976907|ref|XP_006210738.1|/0/PREDICTED: spectrin beta chain, non-erythrocytic 2 isoform X4 [Vicugna pacos]
ENSSSCG00000009216	2686	349.487	1792.32	1.55509	1.81e-05	0.00442186	Up	SPP1	ko05200//Pathways in cancer;ko04151//PI3K-Akt signaling pathway;ko04015//Rap1 signaling pathway;ko04810//Regulation of actin cytoskeleton;ko04514//Cell adhesion molecules (CAMs);ko05205//Proteoglycans in cancer;ko04145//Phagosome;ko04510//Focal adhesion;ko04360//Axon guidance;ko05414//Dilated cardiomyopathy;ko04670//Leukocyte transendothelial migration;ko04611//Platelet activation;ko05206//MicroR…	GO:0005615//extracellular space;GO:0070062//extracellular exosome	GO:0005125//cytokine activity;GO:0050840//extracellular matrix binding	GO:0001649//osteoblast differentiation;GO:0007155//cell adhesion;GO:0031214//biomineral tissue development;GO:0033280//response to vitamin D;GO:0045780//positive regulation of bone resorption	gi|47522868|ref|NP_999188.1|/2.58097e-159/osteopontin precursor [Sus scrofa]
ENSSSCG00000013393	5536	4779.09	1046.82	-1.48798	3.56e-06	0.00117506	Down	SPON1	ko04115//p53 signaling pathway	GO:0005578//proteinaceous extracellular matrix;GO:0005615//extracellular space;GO:0005788//endoplasmic reticulum lumen	GO:0005515//protein binding;GO:0046872//metal ion binding	GO:0007155//cell adhesion;GO:0036066//protein O-linked fucosylation	gi|795247366|ref|XP_011809675.1|/0/1//gi|635015036|ref|XP_008004372.1|/0/1
ENSSSCG00000037598	5833	535.87	1149.87	1.07363	0.000116876	0.0180167	Up	SNX10	-	GO:0005634//nucleus;GO:0005783//endoplasmic reticulum;GO:0005813//centrosome;GO:0031313//extrinsic component of endosome membrane	GO:0005545//1-phosphatidylinositol binding;GO:0051117//ATPase binding	GO:0006897//endocytosis;GO:0007032//endosome organization;GO:0015031//protein transport;GO:0030030//cell projection organization;GO:0030316//osteoclast differentiation;GO:0061512//protein localization to cilium;GO:0071539//protein localization to centrosome	gi|440899274|gb|ELR50603.1|/1.24431e-107/Sorting nexin-10 [Bos mutus]//gi|115496099|ref|NP_001068843.1|/7.45457e-111/sorting nexin-10 [Bos taurus]//gi|115496099|ref|NP_001068843.1|/7.45457e-111/sorting nexin-10 [Bos taurus]
ENSSSCG00000009203	1474	86.2536	21.0852	-1.22855	0.000511888	0.0492176	Down	SNCA	ko05010//Alzheimer's disease;ko05012//Parkinson's disease	GO:0005615//extracellular space;GO:0005634//nucleus;GO:0005747//mitochondrial respiratory chain complex I;GO:0005764//lysosome;GO:0005829//cytosol;GO:0005886//plasma membrane;GO:0005938//cell cortex;GO:0015629//actin cytoskeleton;GO:0016234//inclusion body;GO:0030424//axon;GO:0030426//growth cone;GO:0031092//platelet alpha granule membrane;GO:0043679//axon terminus;GO:0048471//perinuclear region …	GO:0000287//magnesium ion binding;GO:0005504//fatty acid binding;GO:0005507//copper ion binding;GO:0005509//calcium ion binding;GO:0005543//phospholipid binding;GO:0008198//ferrous iron binding;GO:0008270//zinc ion binding;GO:0016491//oxidoreductase activity;GO:0019894//kinesin binding;GO:0019899//enzyme binding;GO:0042393//histone binding;GO:0042802//identical protein binding;GO:0043014//alpha-t…	GO:0000122//negative regulation of transcription from RNA polymerase II promoter;GO:0001774//microglial cell activation;GO:0001921//positive regulation of receptor recycling;GO:0006631//fatty acid metabolic process;GO:0006919//activation of cysteine-type endopeptidase activity involved in apoptotic process;GO:0010040//response to iron(II) ion;GO:0010517//regulation of phospholipase activity;GO:00…	gi|80861405|ref|NP_001032222.1|/3.03172e-65/alpha-synuclein [Sus scrofa]//gi|80861405|ref|NP_001032222.1|/3.03172e-65/alpha-synuclein [Sus scrofa]//gi|80861405|ref|NP_001032222.1|/3.03172e-65/alpha-synuclein [Sus scrofa]//gi|80861405|ref|NP_001032222.1|/3.03172e-65/alpha-synuclein [Sus scrofa]//gi|80861405|ref|NP_001032222.1|/3.03172e-65/alpha-synuclein [Sus scrofa]
ENSSSCG00000002314	3672	2004.62	674.413	-1.24307	1.86e-07	0.000103637	Down	SMOC1	ko05200//Pathways in cancer;ko04151//PI3K-Akt signaling pathway;ko04015//Rap1 signaling pathway;ko04810//Regulation of actin cytoskeleton;ko04514//Cell adhesion molecules (CAMs);ko05205//Proteoglycans in cancer;ko04145//Phagosome;ko04510//Focal adhesion;ko04360//Axon guidance;ko05414//Dilated cardiomyopathy;ko04670//Leukocyte transendothelial migration;ko04611//Platelet activation;ko05410//Hypert…	GO:0005578//proteinaceous extracellular matrix	GO:0005509//calcium ion binding	GO:0001654//eye development;GO:0007165//signal transduction;GO:0045667//regulation of osteoblast differentiation;GO:0060173//limb development	gi|560920613|ref|XP_006186519.1|/0/PREDICTED: SPARC-related modular calcium-binding protein 1 [Camelus ferus]//gi|634852291|ref|XP_007940522.1|/0/PREDICTED: SPARC-related modular calcium-binding protein 1 isoform X2 [Orycteropus afer afer]
ENSSSCG00000004250	4226	163.87	46.0624	-1.22091	0.000190626	0.0242463	Down	SLC35F1	-	GO:0016021//integral component of membrane	-	GO:0006810//transport	gi|742210288|ref|XP_010860108.1|/0/PREDICTED: solute carrier family 35 member F1 [Bison bison bison]
ENSSSCG00000023915	3900	4241.62	8527.26	1.00894	5.2e-05	0.0097071	Up	SLC2A4	ko04910//Insulin signaling pathway;ko04068//FoxO signaling pathway;ko04152//AMPK signaling pathway;ko04931//Insulin resistance;ko04920//Adipocytokine signaling pathway;ko04930//Type II diabetes mellitus	GO:0005768//endosome;GO:0005829//cytosol;GO:0005886//plasma membrane;GO:0005887//integral component of plasma membrane;GO:0009897//external side of plasma membrane;GO:0016021//integral component of membrane;GO:0030140//trans-Golgi network transport vesicle;GO:0030659//cytoplasmic vesicle membrane;GO:0032593//insulin-responsive compartment;GO:0042383//sarcolemma;GO:0045121//membrane raft;GO:004847…	GO:0005355//glucose transmembrane transporter activity	GO:0010021//amylopectin biosynthetic process;GO:0032869//cellular response to insulin stimulus;GO:0042593//glucose homeostasis;GO:0050873//brown fat cell differentiation;GO:0071470//cellular response to osmotic stress;GO:1904659//glucose transmembrane transport	gi|190360619|ref|NP_001121905.1|/0/solute carrier family 2, facilitated glucose transporter member 4 [Sus scrofa]//gi|190360619|ref|NP_001121905.1|/0/solute carrier family 2, facilitated glucose transporter member 4 [Sus scrofa]
ENSSSCG00000038006	5720	1406.76	2802.47	1.01759	3.04e-05	0.0065756	Up	SLC25A33	-	GO:0005743//mitochondrial inner membrane;GO:0016021//integral component of membrane	GO:0003735//structural constituent of ribosome;GO:0015218//pyrimidine nucleotide transmembrane transporter activity	GO:0002082//regulation of oxidative phosphorylation;GO:0006264//mitochondrial DNA replication;GO:0006390//transcription from mitochondrial promoter;GO:0006412//translation;GO:0008284//positive regulation of cell proliferation;GO:0030307//positive regulation of cell growth;GO:0031930//mitochondria-nucleus signaling pathway;GO:0032869//cellular response to insulin stimulus;GO:0034551//mitochondrial…	gi|927145269|ref|XP_003127586.4|/0/PREDICTED: solute carrier family 25 member 33 [Sus scrofa]
ENSSSCG00000021443	3939	6428.73	2193.36	-1.14293	4.6e-05	0.00870031	Down	SGK1	ko04151//PI3K-Akt signaling pathway;ko04068//FoxO signaling pathway;ko04960//Aldosterone-regulated sodium reabsorption	GO:0005654//nucleoplasm;GO:0005737//cytoplasm;GO:0005739//mitochondrion;GO:0005789//endoplasmic reticulum membrane;GO:0005886//plasma membrane	GO:0004674//protein serine/threonine kinase activity;GO:0004712//protein serine/threonine/tyrosine kinase activity;GO:0005246//calcium channel regulator activity;GO:0005524//ATP binding;GO:0015459//potassium channel regulator activity;GO:0017080//sodium channel regulator activity;GO:0017081//chloride channel regulator activity;GO:0035091//phosphatidylinositol binding	GO:0001558//regulation of cell growth;GO:0006468//protein phosphorylation;GO:0006883//cellular sodium ion homeostasis;GO:0006974//cellular response to DNA damage stimulus;GO:0010765//positive regulation of sodium ion transport;GO:0018105//peptidyl-serine phosphorylation;GO:0032411//positive regulation of transporter activity;GO:0035556//intracellular signal transduction;GO:0042127//regulation of …	gi|545797875|ref|XP_005652723.1|/0/PREDICTED: serine/threonine-protein kinase Sgk1 isoform X1 [Sus scrofa]//gi|744590477|ref|XP_010987004.1|/0/PREDICTED: serine/threonine-protein kinase Sgk1 isoform X1 [Camelus dromedarius]//gi|346986481|ref|NP_001231388.1|/0/serine/threonine-protein kinase Sgk1 [Sus scrofa]//gi|545797877|ref|XP_005652724.1|/0/PREDICTED: serine/threonine-protein kinase Sgk1 isofo…
ENSSSCG00000006245	2375	8429.99	20921.3	1.12055	0.000515416	0.0493894	Up	SDR16C5	ko00830//Retinol metabolism	GO:0005789//endoplasmic reticulum membrane;GO:0016021//integral component of membrane	GO:0004745//retinol dehydrogenase activity	GO:0042572//retinol metabolic process;GO:0042574//retinal metabolic process;GO:0043616//keratinocyte proliferation;GO:0055114//oxidation-reduction process	gi|305855178|ref|NP_001182297.1|/0/epidermal retinol dehydrogenase 2 [Sus scrofa]
ENSSSCG00000015914	7343	2858.3	642.836	-1.76409	2.57e-13	5.61e-10	Down	SCN7A	ko04261//Adrenergic signaling in cardiomyocytes	-	-	-	gi|970709599|ref|XP_015092189.1|/0/PREDICTED: sodium channel protein type 7 subunit alpha [Vicugna pacos]//gi|970709599|ref|XP_015092189.1|/0/PREDICTED: sodium channel protein type 7 subunit alpha [Vicugna pacos]
ENSSSCG00000015353	3126	158.025	530.154	1.50168	5.83e-07	0.000262534	Up	SCIN	ko04810//Regulation of actin cytoskeleton;ko05203//Viral carcinogenesis;ko04666//Fc gamma R-mediated phagocytosis	GO:0005903//brush border;GO:0005938//cell cortex;GO:0070062//extracellular exosome	GO:0001786//phosphatidylserine binding;GO:0005509//calcium ion binding;GO:0005546//phosphatidylinositol-4,5-bisphosphate binding;GO:0051015//actin filament binding	GO:0008285//negative regulation of cell proliferation;GO:0017156//calcium ion regulated exocytosis;GO:0032330//regulation of chondrocyte differentiation;GO:0042989//sequestering of actin monomers;GO:0043065//positive regulation of apoptotic process;GO:0045654//positive regulation of megakaryocyte differentiation;GO:0051014//actin filament severing;GO:0051047//positive regulation of secretion;GO:0…	gi|347800709|ref|NP_001231660.1|/0/adseverin [Sus scrofa]//gi|347800709|ref|NP_001231660.1|/0/adseverin [Sus scrofa]//gi|347800709|ref|NP_001231660.1|/0/adseverin [Sus scrofa]
ENSSSCG00000009336	5537	306.271	15.5747	-2.26517	9.14e-10	1.04e-06	Down	RXFP2	ko04080//Neuroactive ligand-receptor interaction	GO:0005886//plasma membrane;GO:0016021//integral component of membrane	GO:0016500//protein-hormone receptor activity	GO:0007189//adenylate cyclase-activating G-protein coupled receptor signaling pathway;GO:0008584//male gonad development	gi|54312082|ref|NP_001005870.1|/0/relaxin receptor 2 [Canis lupus familiaris]//gi|54312082|ref|NP_001005870.1|/0/relaxin receptor 2 [Canis lupus familiaris]
ENSSSCG00000002375	6145	80.0465	233.822	1.25217	0.000161927	0.0225142	Up	RPS6KL1	ko04010//MAPK signaling pathway;ko04722//Neurotrophin signaling pathway;ko04114//Oocyte meiosis;ko04931//Insulin resistance;ko04720//Long-term potentiation;ko04914//Progesterone-mediated oocyte maturation;ko04150//mTOR signaling pathway	GO:0005737//cytoplasm;GO:0043231//intracellular membrane-bounded organelle	GO:0004674//protein serine/threonine kinase activity;GO:0005524//ATP binding	GO:0006468//protein phosphorylation;GO:0007165//signal transduction	gi|335292792|ref|XP_001924608.2|/0/PREDICTED: ribosomal protein S6 kinase-like 1 [Sus scrofa]//gi|335292792|ref|XP_001924608.2|/0/PREDICTED: ribosomal protein S6 kinase-like 1 [Sus scrofa]//gi|335292792|ref|XP_001924608.2|/0/PREDICTED: ribosomal protein S6 kinase-like 1 [Sus scrofa]
ENSSSCG00000012001	7805	1288.56	3575.27	1.20387	0.000154853	0.0220114	Up	ROBO1	ko04360//Axon guidance	-	-	-	gi|927202950|ref|XP_013837974.1|/0/PREDICTED: roundabout homolog 1 isoform X8 [Sus scrofa]//gi|927202943|ref|XP_013837970.1|/0/PREDICTED: roundabout homolog 1 isoform X4 [Sus scrofa]//gi|961751276|ref|XP_014936258.1|/0/PREDICTED: roundabout homolog 1-like, partial [Acinonyx jubatus]//gi|594076964|ref|XP_006062214.1|/0/PREDICTED: roundabout homolog 1-like, partial [Bubalus bubalis]//gi|350592076|r…
ENSSSCG00000031261	4171	7516.14	14360.9	1.00816	8.19e-08	5.28e-05	Up	RHOQ	ko04910//Insulin signaling pathway	GO:0005829//cytosol;GO:0005884//actin filament;GO:0005886//plasma membrane;GO:0030660//Golgi-associated vesicle membrane;GO:0045121//membrane raft;GO:0070062//extracellular exosome	GO:0003924//GTPase activity;GO:0005522//profilin binding;GO:0005525//GTP binding;GO:0032427//GBD domain binding	GO:0008286//insulin receptor signaling pathway;GO:0008360//regulation of cell shape;GO:0030866//cortical actin cytoskeleton organization;GO:0032956//regulation of actin cytoskeleton organization;GO:0045944//positive regulation of transcription from RNA polymerase II promoter;GO:0046039//GTP metabolic process;GO:0046325//negative regulation of glucose import;GO:0046326//positive regulation of gluc…	gi|50263042|ref|NP_036381.2|/6.23936e-151/1
ENSSSCG00000003399	612	1105.92	149.966	-2.48392	1.88e-29	2.67e-25	Down	RBP7	ko04977//Vitamin digestion and absorption	GO:0005737//cytoplasm	GO:0005215//transporter activity;GO:0005515//protein binding;GO:0016918//retinal binding;GO:0019841//retinol binding	GO:0006810//transport	gi|223634471|ref|NP_001138694.1|/4.57945e-98/retinoid-binding protein 7 [Sus scrofa]
ENSSSCG00000039512	3316	630.943	147.672	-1.32834	0.000179973	0.0236353	Down	RBP5	ko01100//Metabolic pathways;ko04977//Vitamin digestion and absorption;ko00760//Nicotinate and nicotinamide metabolism	GO:0070062//extracellular exosome	GO:0005215//transporter activity;GO:0016918//retinal binding	GO:0006810//transport	gi|223634473|ref|NP_001138695.1|/1.70064e-84/retinol-binding protein 5 [Sus scrofa]
ENSSSCG00000033792	2704	421.387	1094.8	1.38369	6.24e-11	8.43e-08	Up	RAB40C	-	GO:0005886//plasma membrane;GO:0048471//perinuclear region of cytoplasm	GO:0005525//GTP binding;GO:0019003//GDP binding	GO:0001881//receptor recycling;GO:0007264//small GTPase mediated signal transduction;GO:0016567//protein ubiquitination;GO:0042552//myelination	gi|21040231|ref|NP_631893.1|/0/1//gi|21040231|ref|NP_631893.1|/0/1
ENSSSCG00000003788	5908	2838.2	1034.65	-1.07698	0.00016304	0.0225584	Down	PTGER3	ko05200//Pathways in cancer;ko04080//Neuroactive ligand-receptor interaction;ko04020//Calcium signaling pathway;ko04024//cAMP signaling pathway;ko04923//Regulation of lipolysis in adipocytes	GO:0005886//plasma membrane;GO:0016021//integral component of membrane	GO:0004957//prostaglandin E receptor activity	GO:0007186//G-protein coupled receptor signaling pathway	gi|2791939|emb|CAA04595.1|/0/Prostaglandin EP3 receptor [Sus scrofa]//gi|47523180|ref|NP_998999.1|/0/prostaglandin E2 receptor EP3 subtype [Sus scrofa]
ENSSSCG00000011495	8268	1386.53	3316.74	1.29231	3.59e-10	4.43e-07	Up	PRICKLE2	ko04310//Wnt signaling pathway	GO:0005737//cytoplasm	GO:0008270//zinc ion binding	-	gi|311269107|ref|XP_003132345.1|/0/PREDICTED: prickle-like protein 2 [Sus scrofa]//gi|311269107|ref|XP_003132345.1|/0/PREDICTED: prickle-like protein 2 [Sus scrofa]
ENSSSCG00000000591	6402	688.198	4230.42	1.84749	2.08e-07	0.000111294	Up	PIK3C2G	ko01100//Metabolic pathways;ko04070//Phosphatidylinositol signaling system;ko00562//Inositol phosphate metabolism	GO:0005622//intracellular;GO:0005886//plasma membrane;GO:0005942//phosphatidylinositol 3-kinase complex	GO:0016303//1-phosphatidylinositol-3-kinase activity;GO:0035005//1-phosphatidylinositol-4-phosphate 3-kinase activity;GO:0035091//phosphatidylinositol binding	GO:0036092//phosphatidylinositol-3-phosphate biosynthetic process;GO:0046854//phosphatidylinositol phosphorylation;GO:0048015//phosphatidylinositol-mediated signaling	gi|927131643|ref|XP_013843806.1|/0/PREDICTED: phosphatidylinositol 4-phosphate 3-kinase C2 domain-containing subunit gamma isoform X2 [Sus scrofa]//gi|927131643|ref|XP_013843806.1|/0/PREDICTED: phosphatidylinositol 4-phosphate 3-kinase C2 domain-containing subunit gamma isoform X2 [Sus scrofa]
ENSSSCG00000029359	372	342.767	770.435	1.12348	0.000114794	0.0179101	Up	PHLDA3	-	GO:0005737//cytoplasm;GO:0005886//plasma membrane;GO:0070062//extracellular exosome	GO:0005546//phosphatidylinositol-4,5-bisphosphate binding;GO:0005547//phosphatidylinositol-3,4,5-trisphosphate binding;GO:0010314//phosphatidylinositol-5-phosphate binding;GO:0032266//phosphatidylinositol-3-phosphate binding;GO:0043325//phosphatidylinositol-3,4-bisphosphate binding;GO:0080025//phosphatidylinositol-3,5-bisphosphate binding	GO:0009653//anatomical structure morphogenesis;GO:0042771//intrinsic apoptotic signaling pathway in response to DNA damage by p53 class mediator;GO:0043065//positive regulation of apoptotic process;GO:0051898//negative regulation of protein kinase B signaling	gi|62896847|dbj|BAD96364.1|/2.80121e-81/1
ENSSSCG00000011465	4139	0	552.977	5.91949	6.37e-75	1.81e-70	Up	PDE12	-	GO:0005759//mitochondrial matrix	GO:0004535//poly(A)-specific ribonuclease activity;GO:0046872//metal ion binding	GO:0006397//mRNA processing;GO:0090503//RNA phosphodiester bond hydrolysis, exonucleolytic	gi|311269040|ref|XP_001926497.2|/0/PREDICTED: 2',5'-phosphodiesterase 12 [Sus scrofa]
ENSSSCG00000007507	4924	26881.2	1866.26	-2.42829	9.83e-12	1.55e-08	Down	PCK1	ko01100//Metabolic pathways;ko04151//PI3K-Akt signaling pathway;ko04910//Insulin signaling pathway;ko04068//FoxO signaling pathway;ko04152//AMPK signaling pathway;ko04931//Insulin resistance;ko04922//Glucagon signaling pathway;ko03320//PPAR signaling pathway;ko04920//Adipocytokine signaling pathway;ko00010//Glycolysis / Gluconeogenesis;ko00620//Pyruvate metabolism;ko00020//Citrate cycle (TCA cycl…	GO:0005829//cytosol;GO:0070062//extracellular exosome	GO:0000287//magnesium ion binding;GO:0004613//phosphoenolpyruvate carboxykinase (GTP) activity;GO:0005525//GTP binding;GO:0016301//kinase activity;GO:0030145//manganese ion binding;GO:0031406//carboxylic acid binding	GO:0006094//gluconeogenesis;GO:0006475//internal protein amino acid acetylation;GO:0016310//phosphorylation;GO:0032868//response to insulin;GO:0046327//glycerol biosynthetic process from pyruvate;GO:0051365//cellular response to potassium ion starvation;GO:0061402//positive regulation of transcription from RNA polymerase II promoter in response to acidic pH	gi|178056560|ref|NP_001116630.1|/0/phosphoenolpyruvate carboxykinase, cytosolic [GTP] [Sus scrofa]//gi|178056560|ref|NP_001116630.1|/0/phosphoenolpyruvate carboxykinase, cytosolic [GTP] [Sus scrofa]
ENSSSCG00000015512	9818	1873.79	214.045	-1.60264	1.58e-05	0.00395355	Down	PAPPA2	-	GO:0070062//extracellular exosome	GO:0008237//metallopeptidase activity;GO:0008270//zinc ion binding	GO:0006508//proteolysis;GO:0060349//bone morphogenesis	gi|350589027|ref|XP_003130378.3|/0/PREDICTED: pappalysin-2 [Sus scrofa]
ENSSSCG00000000856	1697	159.011	22.2037	-1.58717	1.62e-05	0.00403491	Down	PAH	ko01100//Metabolic pathways;ko01230//Biosynthesis of amino acids;ko00360//Phenylalanine metabolism;ko00400//Phenylalanine, tyrosine and tryptophan biosynthesis	-	-	-	gi|755750271|ref|XP_003989232.3|/0/PREDICTED: phenylalanine-4-hydroxylase [Felis catus]//gi|755750271|ref|XP_003989232.3|/0/PREDICTED: phenylalanine-4-hydroxylase [Felis catus]
ENSSSCG00000014840	2242	197.131	45.288	-1.29164	0.000204516	0.0253314	Down	P4HA3	ko01100//Metabolic pathways;ko00330//Arginine and proline metabolism	GO:0005788//endoplasmic reticulum lumen	GO:0004656//procollagen-proline 4-dioxygenase activity;GO:0005506//iron ion binding;GO:0016702//oxidoreductase activity, acting on single donors with incorporation of molecular oxygen, incorporation of two atoms of oxygen;GO:0031418//L-ascorbic acid binding	GO:0019511//peptidyl-proline hydroxylation;GO:0055114//oxidation-reduction process	gi|335294484|ref|XP_003357239.1|/0/PREDICTED: prolyl 4-hydroxylase subunit alpha-3 [Sus scrofa]
ENSSSCG00000010101	2819	143.156	322.577	1.05997	0.000187977	0.0242346	Up	P2RX6	ko04080//Neuroactive ligand-receptor interaction;ko04020//Calcium signaling pathway	GO:0005639//integral component of nuclear inner membrane;GO:0005737//cytoplasm;GO:0005887//integral component of plasma membrane;GO:0030054//cell junction	GO:0001614//purinergic nucleotide receptor activity;GO:0004931//extracellular ATP-gated cation channel activity;GO:0005524//ATP binding;GO:0042802//identical protein binding	GO:0033198//response to ATP;GO:0035590//purinergic nucleotide receptor signaling pathway;GO:0051260//protein homooligomerization;GO:0098655//cation transmembrane transport	gi|927205938|ref|XP_013838649.1|/0/PREDICTED: P2X purinoceptor 6 [Sus scrofa]//gi|927205938|ref|XP_013838649.1|/0/PREDICTED: P2X purinoceptor 6 [Sus scrofa]
ENSSSCG00000005106	4193	175.252	63.4067	-1.07982	0.000438926	0.0441478	Down	NTRK3	ko04722//Neurotrophin signaling pathway;ko05230//Central carbon metabolism in cancer	GO:0005737//cytoplasm;GO:0005887//integral component of plasma membrane;GO:0043235//receptor complex	GO:0002039//p53 binding;GO:0005004//GPI-linked ephrin receptor activity;GO:0005030//neurotrophin receptor activity;GO:0005524//ATP binding;GO:0043121//neurotrophin binding	GO:0000187//activation of MAPK activity;GO:0001764//neuron migration;GO:0001933//negative regulation of protein phosphorylation;GO:0007507//heart development;GO:0007623//circadian rhythm;GO:0008284//positive regulation of cell proliferation;GO:0010628//positive regulation of gene expression;GO:0018108//peptidyl-tyrosine phosphorylation;GO:0019056//modulation by virus of host transcription;GO:0030…	gi|47523616|ref|NP_999436.1|/0/NT-3 growth factor receptor precursor [Sus scrofa]//gi|466082746|ref|XP_004284823.1|/0/PREDICTED: NT-3 growth factor receptor isoform X2 [Orcinus orca]//gi|767984308|ref|XP_011519936.1|/0/1//gi|992319530|ref|NP_001307063.1|/0/1//gi|675663156|ref|XP_008996696.1|/0/1
ENSSSCG00000015871	5776	1370.18	543.533	-1.05265	4.85e-06	0.00154725	Down	NR4A2	ko04925//Aldosterone synthesis and secretion	GO:0005654//nucleoplasm;GO:0005737//cytoplasm	GO:0000979//RNA polymerase II core promoter sequence-specific DNA binding;GO:0001077//transcriptional activator activity, RNA polymerase II core promoter proximal region sequence-specific binding;GO:0003707//steroid hormone receptor activity;GO:0004879//RNA polymerase II transcription factor activity, ligand-activated sequence-specific DNA binding;GO:0008270//zinc ion binding;GO:0035259//glucocor…	GO:0000122//negative regulation of transcription from RNA polymerase II promoter;GO:0001666//response to hypoxia;GO:0001764//neuron migration;GO:0001975//response to amphetamine;GO:0008344//adult locomotory behavior;GO:0009791//post-embryonic development;GO:0021952//central nervous system projection neuron axonogenesis;GO:0021986//habenula development;GO:0030522//intracellular receptor signaling …	gi|545874350|ref|XP_005657586.1|/0/PREDICTED: nuclear receptor subfamily 4 group A member 2 isoform X1 [Sus scrofa]//gi|545874350|ref|XP_005657586.1|/0/PREDICTED: nuclear receptor subfamily 4 group A member 2 isoform X1 [Sus scrofa]//gi|594670396|ref|XP_007183161.1|/0/PREDICTED: nuclear receptor subfamily 4 group A member 2 isoform X6 [Balaenoptera acutorostrata scammoni]//gi|545874350|ref|XP_005…
ENSSSCG00000007517	3766	128.001	597.214	1.44343	6.85e-05	0.0120313	Up	NPEPL1	-	GO:0005634//nucleus;GO:0005737//cytoplasm;GO:0016021//integral component of membrane;GO:0031201//SNARE complex	GO:0004177//aminopeptidase activity;GO:0005484//SNAP receptor activity;GO:0008235//metalloexopeptidase activity;GO:0030145//manganese ion binding	GO:0006508//proteolysis;GO:0006886//intracellular protein transport;GO:0016192//vesicle-mediated transport;GO:0061025//membrane fusion	gi|178056556|ref|NP_001116620.1|/0/probable aminopeptidase NPEPL1 [Sus scrofa]//gi|178056556|ref|NP_001116620.1|/0/probable aminopeptidase NPEPL1 [Sus scrofa]
ENSSSCG00000040778	6232	462.111	1010.03	1.10243	7.63e-05	0.0132822	Up	NIPA1	-	GO:0005769//early endosome;GO:0005886//plasma membrane;GO:0016021//integral component of membrane	GO:0015095//magnesium ion transmembrane transporter activity	GO:0015693//magnesium ion transport;GO:1903830//magnesium ion transmembrane transport	gi|440911988|gb|ELR61601.1|/0/Magnesium transporter NIPA1, partial [Bos mutus]
ENSSSCG00000007135	4060	124.694	277.392	1.10335	6.65e-05	0.0117801	Up	NINL	-	-	GO:0005509//calcium ion binding	-	gi|545879675|ref|XP_005657723.1|/0/PREDICTED: ninein-like protein isoform X1 [Sus scrofa]//gi|927214310|ref|XP_013846157.1|/0/PREDICTED: ninein-like protein isoform X2 [Sus scrofa]
ENSSSCG00000026894	4087	343.513	79.4466	-1.41787	2.03e-05	0.00484226	Down	NFE2L3	-	GO:0005634//nucleus;GO:0005737//cytoplasm	GO:0000976//transcription regulatory region sequence-specific DNA binding;GO:0003700//transcription factor activity, sequence-specific DNA binding;GO:0003713//transcription coactivator activity;GO:0005515//protein binding	GO:0006357//regulation of transcription from RNA polymerase II promoter;GO:0045893//positive regulation of transcription, DNA-templated	gi|694920231|ref|XP_009451071.1|/0/1//gi|335305560|ref|XP_003360238.1|/0/PREDICTED: LOW QUALITY PROTEIN: nuclear factor erythroid 2-related factor 3 [Sus scrofa]
ENSSSCG00000027443	4317	6107.68	12836	1.09304	2.78e-07	0.000140869	Up	MRAS	ko04015//Rap1 signaling pathway;ko04810//Regulation of actin cytoskeleton;ko05205//Proteoglycans in cancer;ko05166//HTLV-I infection;ko04014//Ras signaling pathway;ko04010//MAPK signaling pathway;ko04530//Tight junction;ko04072//Phospholipase D signaling pathway	GO:0005622//intracellular;GO:0016020//membrane;GO:0070062//extracellular exosome	GO:0005525//GTP binding;GO:0030742//GTP-dependent protein binding	GO:0007264//small GTPase mediated signal transduction	gi|148236813|ref|NP_001091587.1|/9.99607e-133/ras-related protein M-Ras [Bos taurus]
ENSSSCG00000003744	3089	335.097	877.602	1.2161	6.87e-05	0.0120313	Up	MOCOS	-	-	GO:0008265//Mo-molybdopterin cofactor sulfurase activity;GO:0016740//transferase activity;GO:0016829//lyase activity;GO:0030151//molybdenum ion binding;GO:0030170//pyridoxal phosphate binding	GO:0006777//Mo-molybdopterin cofactor biosynthetic process	gi|335291298|ref|XP_003356462.1|/0/PREDICTED: molybdenum cofactor sulfurase isoform X1 [Sus scrofa]
ENSSSCG00000007436	5119	25.1245	186.529	1.51144	5.76e-05	0.0106175	Up	MMP9	ko05200//Pathways in cancer;ko05205//Proteoglycans in cancer;ko04670//Leukocyte transendothelial migration;ko05206//MicroRNAs in cancer;ko05202//Transcriptional misregulation in cancer;ko05161//Hepatitis B;ko04668//TNF signaling pathway;ko04915//Estrogen signaling pathway;ko05219//Bladder cancer	GO:0005578//proteinaceous extracellular matrix;GO:0005615//extracellular space;GO:0070062//extracellular exosome	GO:0004222//metalloendopeptidase activity;GO:0008270//zinc ion binding;GO:0042802//identical protein binding	GO:0001501//skeletal system development;GO:0001503//ossification;GO:0001934//positive regulation of protein phosphorylation;GO:0007566//embryo implantation;GO:0030198//extracellular matrix organization;GO:0030574//collagen catabolic process;GO:0035987//endodermal cell differentiation;GO:0043388//positive regulation of DNA binding;GO:0045742//positive regulation of epidermal growth factor receptor…	gi|83921637|ref|NP_001033093.1|/0/matrix metalloproteinase-9 precursor [Sus scrofa]//gi|83921637|ref|NP_001033093.1|/0/matrix metalloproteinase-9 precursor [Sus scrofa]//gi|83921637|ref|NP_001033093.1|/0/matrix metalloproteinase-9 precursor [Sus scrofa]
ENSSSCG00000002257	4247	1049.2	163.732	-1.65233	3.43e-06	0.00114444	Down	MCTP2	ko05200//Pathways in cancer;ko04151//PI3K-Akt signaling pathway;ko04015//Rap1 signaling pathway;ko05205//Proteoglycans in cancer;ko04510//Focal adhesion;ko04014//Ras signaling pathway;ko04670//Leukocyte transendothelial migration;ko05206//MicroRNAs in cancer;ko04010//MAPK signaling pathway;ko05130//Pathogenic Escherichia coli infection;ko04530//Tight junction;ko04020//Calcium signaling pathway;ko…	GO:0005654//nucleoplasm;GO:0005783//endoplasmic reticulum;GO:0016021//integral component of membrane	GO:0005509//calcium ion binding;GO:0005544//calcium-dependent phospholipid binding	GO:0007275//multicellular organism development;GO:0019722//calcium-mediated signaling	gi|767984672|ref|XP_011520072.1|/0/1//gi|149691017|ref|XP_001488345.1|/0/PREDICTED: multiple C2 and transmembrane domain-containing protein 2 isoform X1 [Equus caballus]//gi|149691017|ref|XP_001488345.1|/0/PREDICTED: multiple C2 and transmembrane domain-containing protein 2 isoform X1 [Equus caballus]//gi|149691017|ref|XP_001488345.1|/0/PREDICTED: multiple C2 and transmembrane domain-containing p…
ENSSSCG00000038767	4950	302.033	696.505	1.10515	0.000200505	0.0250361	Up	MBP	-	GO:0005886//plasma membrane;GO:0033269//internode region of axon;GO:0043025//neuronal cell body;GO:0043209//myelin sheath;GO:0043218//compact myelin;GO:0071944//cell periphery	GO:0002020//protease binding;GO:0019911//structural constituent of myelin sheath	GO:0009636//response to toxic substance;GO:0021762//substantia nigra development;GO:0042552//myelination;GO:0061024//membrane organization	gi|955498162|ref|XP_014636993.1|/1.40333e-102/PREDICTED: myelin basic protein isoform X3 [Ceratotherium simum simum]//gi|48374091|ref|NP_001001546.1|/3.06841e-126/myelin basic protein [Sus scrofa]//gi|955498162|ref|XP_014636993.1|/1.40333e-102/PREDICTED: myelin basic protein isoform X3 [Ceratotherium simum simum]//gi|955498162|ref|XP_014636993.1|/1.09135e-109/PREDICTED: myelin basic protein isofo…
ENSSSCG00000013494	5032	109.517	280.574	1.25556	6.41e-06	0.00195608	Up	MATK	ko04722//Neurotrophin signaling pathway	GO:0031234//extrinsic component of cytoplasmic side of plasma membrane	GO:0004715//non-membrane spanning protein tyrosine kinase activity;GO:0005102//receptor binding;GO:0005524//ATP binding	GO:0007169//transmembrane receptor protein tyrosine kinase signaling pathway;GO:0016477//cell migration;GO:0030154//cell differentiation;GO:0038083//peptidyl-tyrosine autophosphorylation;GO:0042127//regulation of cell proliferation;GO:0045087//innate immune response	gi|927104512|ref|XP_013850230.1|/0/PREDICTED: megakaryocyte-associated tyrosine-protein kinase isoform X4 [Sus scrofa]//gi|545810459|ref|XP_005661402.1|/0/PREDICTED: megakaryocyte-associated tyrosine-protein kinase isoform X5 [Sus scrofa]//gi|927104512|ref|XP_013850230.1|/0/PREDICTED: megakaryocyte-associated tyrosine-protein kinase isoform X4 [Sus scrofa]//gi|927104512|ref|XP_013850230.1|/0/PRED…
ENSSSCG00000000492	1264	163.064	516.952	1.39276	2.31e-05	0.0053269	Up	LYZ	ko04970//Salivary secretion	GO:0005615//extracellular space;GO:0070062//extracellular exosome	GO:0003796//lysozyme activity;GO:0042802//identical protein binding	GO:0001895//retina homeostasis;GO:0007586//digestion;GO:0008152//metabolic process;GO:0019835//cytolysis;GO:0042742//defense response to bacterium	gi|269914120|ref|NP_999557.2|/3.77951e-96/lysozyme C-3 precursor [Sus scrofa]
ENSSSCG00000027941	5022	470.644	89.9947	-1.85445	1.45e-10	1.87e-07	Down	LSAMP	-	GO:0016021//integral component of membrane	-	GO:0035641//locomotory exploration behavior	gi|961765749|ref|XP_014941818.1|/0/PREDICTED: limbic system-associated membrane protein [Acinonyx jubatus]//gi|671031285|ref|XP_008706446.1|/0/PREDICTED: limbic system-associated membrane protein isoform X2 [Ursus maritimus]//gi|347662507|ref|NP_001231626.1|/0/limbic system-associated membrane protein precursor [Sus scrofa]
ENSSSCG00000024917	1764	36.4826	220.091	1.38983	0.000218837	0.0265685	Up	LRRN4CL	-	GO:0016020//membrane	-	-	gi|335281678|ref|XP_003353868.1|/9.04363e-145/PREDICTED: LOW QUALITY PROTEIN: LRRN4 C-terminal-like protein [Sus scrofa]
ENSSSCG00000039445	6459	342.969	711.148	1.08173	1.42e-06	0.000551223	Up	LRRC55	ko04514//Cell adhesion molecules (CAMs);ko04360//Axon guidance;ko05010//Alzheimer's disease;ko04726//Serotonergic synapse	-	-	-	gi|545530048|ref|XP_005631267.1|/0/PREDICTED: leucine-rich repeat-containing protein 55 [Canis lupus familiaris]
ENSSSCG00000008995	2951	101.122	8.98396	-1.4742	8.79e-05	0.0146656	Down	LRAT	ko00830//Retinol metabolism;ko04977//Vitamin digestion and absorption	GO:0005771//multivesicular body;GO:0005789//endoplasmic reticulum membrane;GO:0005791//rough endoplasmic reticulum;GO:0016021//integral component of membrane;GO:0048471//perinuclear region of cytoplasm	GO:0047173//phosphatidylcholine-retinol O-acyltransferase activity	GO:0006776//vitamin A metabolic process;GO:0007601//visual perception;GO:0032370//positive regulation of lipid transport;GO:0042572//retinol metabolic process;GO:0050896//response to stimulus	gi|349732179|ref|NP_001231849.1|/1.49271e-163/lecithin retinol acyltransferase [Sus scrofa]//gi|349732179|ref|NP_001231849.1|/1.49271e-163/lecithin retinol acyltransferase [Sus scrofa]//gi|349732179|ref|NP_001231849.1|/1.49271e-163/lecithin retinol acyltransferase [Sus scrofa]
ENSSSCG00000032381	5396	3939.93	8310.7	1.10073	7.62e-07	0.000322677	Up	LITAF	ko04142//Lysosome	GO:0005794//Golgi apparatus;GO:0016020//membrane;GO:0044446	GO:0004871//signal transducer activity;GO:0050699//WW domain binding	GO:0032496//response to lipopolysaccharide;GO:0043123//positive regulation of I-kappaB kinase/NF-kappaB signaling	gi|311251502|ref|XP_003124641.1|/1.16265e-79/PREDICTED: lipopolysaccharide-induced tumor necrosis factor-alpha factor [Sus scrofa]//gi|311251502|ref|XP_003124641.1|/1.16265e-79/PREDICTED: lipopolysaccharide-induced tumor necrosis factor-alpha factor [Sus scrofa]
ENSSSCG00000040464	3917	1463.68	7238.91	2.13495	1.32e-15	4.16e-12	Up	LEP	ko04060//Cytokine-cytokine receptor interaction;ko04080//Neuroactive ligand-receptor interaction;ko04932//Non-alcoholic fatty liver disease (NAFLD);ko04630//Jak-STAT signaling pathway;ko04152//AMPK signaling pathway;ko04920//Adipocytokine signaling pathway	GO:0005615//extracellular space;GO:0005737//cytoplasm	GO:0005179//hormone activity;GO:0008083//growth factor activity;GO:0051428//peptide hormone receptor binding	GO:0000122//negative regulation of transcription from RNA polymerase II promoter;GO:0001890//placenta development;GO:0001936//regulation of endothelial cell proliferation;GO:0002021//response to dietary excess;GO:0006111//regulation of gluconeogenesis;GO:0006112//energy reserve metabolic process;GO:0006635//fatty acid beta-oxidation;GO:0006909//phagocytosis;GO:0007260//tyrosine phosphorylation of…	gi|55741433|ref|NP_999005.1|/9.30429e-104/leptin precursor [Sus scrofa]
ENSSSCG00000005710	5902	1318.58	214.64	-1.50046	2.86e-05	0.00633424	Down	LAMC3	ko05200//Pathways in cancer;ko04151//PI3K-Akt signaling pathway;ko04510//Focal adhesion;ko05145//Toxoplasmosis;ko04512//ECM-receptor interaction;ko05222//Small cell lung cancer;ko05146//Amoebiasis	GO:0005604//basement membrane;GO:0016020//membrane	GO:0005198//structural molecule activity	GO:0000904//cell morphogenesis involved in differentiation;GO:0007155//cell adhesion;GO:0007601//visual perception;GO:0014002//astrocyte development;GO:0030198//extracellular matrix organization;GO:0060041//retina development in camera-type eye	gi|744550681|ref|XP_010973677.1|/0/PREDICTED: LOW QUALITY PROTEIN: laminin subunit gamma-3 [Camelus dromedarius]
ENSSSCG00000010770	5127	46.7048	1.35904	-1.39017	0.000132786	0.0195147	Down	KNDC1	ko05200//Pathways in cancer;ko04151//PI3K-Akt signaling pathway;ko04015//Rap1 signaling pathway;ko04810//Regulation of actin cytoskeleton;ko04514//Cell adhesion molecules (CAMs);ko05205//Proteoglycans in cancer;ko04145//Phagosome;ko04510//Focal adhesion;ko04360//Axon guidance;ko05169//Epstein-Barr virus infection;ko05414//Dilated cardiomyopathy;ko04670//Leukocyte transendothelial migration;ko0461…	-	-	-	gi|927208903|ref|XP_013849607.1|/0/PREDICTED: LOW QUALITY PROTEIN: protein very KIND [Sus scrofa]
ENSSSCG00000005941	2581	146.648	38.478	-1.27194	0.000125203	0.0190147	Down	KHDRBS3	-	GO:0005654//nucleoplasm	GO:0044822//poly(A) RNA binding	-	gi|545819941|ref|XP_005662892.1|/0/PREDICTED: KH domain-containing, RNA-binding, signal transduction-associated protein 3 [Sus scrofa]//gi|134085846|ref|NP_001076981.1|/0/KH domain-containing, RNA-binding, signal transduction-associated protein 3 [Bos taurus]
ENSSSCG00000000203	4383	54.5833	547.738	2.5323	6.95e-15	1.97e-11	Up	KCNH3	-	GO:0005622//intracellular;GO:0005887//integral component of plasma membrane;GO:0016021//integral component of membrane	GO:0000155//phosphorelay sensor kinase activity;GO:0005249//voltage-gated potassium channel activity	GO:0000160//phosphorelay signal transduction system;GO:0023014//signal transduction by protein phosphorylation;GO:0042391//regulation of membrane potential;GO:0071805//potassium ion transmembrane transport	gi|556771720|ref|XP_005981034.1|/0/PREDICTED: potassium voltage-gated channel subfamily H member 3 [Pantholops hodgsonii]//gi|556771720|ref|XP_005981034.1|/0/PREDICTED: potassium voltage-gated channel subfamily H member 3 [Pantholops hodgsonii]
ENSSSCG00000034884	1407	8.95758	139.346	2.03599	5.32e-08	3.77e-05	Up	IRX1	ko04350//TGF-beta signaling pathway	-	-	GO:0072086//specification of loop of Henle identity;GO:0072272//proximal/distal pattern formation involved in metanephric nephron development	gi|826348666|ref|XP_012519183.1|/0/1
ENSSSCG00000030345	3340	166.886	13.213	-1.53348	4.41e-05	0.00844908	Down	INPP5J	ko01100//Metabolic pathways;ko04910//Insulin signaling pathway;ko04070//Phosphatidylinositol signaling system;ko00562//Inositol phosphate metabolism	-	-	-	gi|927205609|ref|XP_005670913.2|/0/PREDICTED: phosphatidylinositol 4,5-bisphosphate 5-phosphatase A isoform X3 [Sus scrofa]
ENSSSCG00000008090	1807	303.528	19.4458	-2.57066	8.66e-14	2.05e-10	Down	IL1A	ko05152//Tuberculosis;ko04010//MAPK signaling pathway;ko04060//Cytokine-cytokine receptor interaction;ko05133//Pertussis;ko05140//Leishmaniasis;ko04380//Osteoclast differentiation;ko04640//Hematopoietic cell lineage;ko05164//Influenza A;ko05162//Measles;ko04932//Non-alcoholic fatty liver disease (NAFLD);ko05323//Rheumatoid arthritis;ko05132//Salmonella infection;ko05321//Inflammatory bowel diseas…	GO:0005615//extracellular space;GO:0005829//cytosol	GO:0005125//cytokine activity;GO:0005149//interleukin-1 receptor binding;GO:0005507//copper ion binding	GO:0001660//fever generation;GO:0002248//connective tissue replacement involved in inflammatory response wound healing;GO:0006955//immune response;GO:0008285//negative regulation of cell proliferation;GO:0010575//positive regulation of vascular endothelial growth factor production;GO:0019221//cytokine-mediated signaling pathway;GO:0034605//cellular response to heat;GO:0035234//ectopic germ cell p…	gi|47522878|ref|NP_999194.1|/0/interleukin-1 alpha precursor [Sus scrofa]
ENSSSCG00000016273	5298	67.874	14.1991	-1.30146	0.000399321	0.0413927	Down	HTR2B	ko04080//Neuroactive ligand-receptor interaction;ko04020//Calcium signaling pathway;ko04726//Serotonergic synapse;ko04750//Inflammatory mediator regulation of TRP channels;ko04540//Gap junction	GO:0005737//cytoplasm;GO:0005887//integral component of plasma membrane;GO:0030054//cell junction;GO:0043005//neuron projection;GO:0045202//synapse	GO:0001965//G-protein alpha-subunit binding;GO:0004993//G-protein coupled serotonin receptor activity;GO:0005096//GTPase activator activity;GO:0008144//drug binding;GO:0051378//serotonin binding	GO:0001755//neural crest cell migration;GO:0001938//positive regulation of endothelial cell proliferation;GO:0002031//G-protein coupled receptor internalization;GO:0003007//heart morphogenesis;GO:0003300//cardiac muscle hypertrophy;GO:0006182//cGMP biosynthetic process;GO:0007202//activation of phospholipase C activity;GO:0007205//protein kinase C-activating G-protein coupled receptor signaling p…	gi|927211687|ref|XP_013840018.1|/0/PREDICTED: 5-hydroxytryptamine receptor 2B isoform X3 [Sus scrofa]//gi|255683517|ref|NP_001157491.1|/0/5-hydroxytryptamine receptor 2B [Sus scrofa]
ENSSSCG00000015616	3477	2225.68	633.305	-1.26045	4.18e-05	0.00824939	Down	HSD11B1	ko01100//Metabolic pathways;ko05204//Chemical carcinogenesis;ko00140//Steroid hormone biosynthesis;ko00980//Metabolism of xenobiotics by cytochrome P450	GO:0005789//endoplasmic reticulum membrane;GO:0016021//integral component of membrane	GO:0003845//11-beta-hydroxysteroid dehydrogenase [NAD(P)] activity;GO:0070524//11-beta-hydroxysteroid dehydrogenase (NADP+) activity	GO:0008202//steroid metabolic process;GO:0030324//lung development;GO:0055114//oxidation-reduction process	gi|914718194|gb|AKV89674.1|/0/corticosteroid 11-beta-dehydrogenase isozyme 1 [Sus scrofa]//gi|914718194|gb|AKV89674.1|/1.24503e-150/corticosteroid 11-beta-dehydrogenase isozyme 1 [Sus scrofa]//gi|914718194|gb|AKV89674.1|/0/corticosteroid 11-beta-dehydrogenase isozyme 1 [Sus scrofa]//gi|914718194|gb|AKV89674.1|/0/corticosteroid 11-beta-dehydrogenase isozyme 1 [Sus scrofa]
ENSSSCG00000009789	2909	5290.49	1465.89	-1.38073	4.9e-07	0.000235691	Down	HCAR1	ko04024//cAMP signaling pathway	GO:0016021//integral component of membrane	GO:0004930//G-protein coupled receptor activity	GO:0002230//positive regulation of defense response to virus by host;GO:0007186//G-protein coupled receptor signaling pathway;GO:0098779//mitophagy in response to mitochondrial depolarization;GO:0098792//xenophagy	gi|223950627|ref|NP_001138853.1|/0/G-protein coupled receptor 81 [Sus scrofa]
ENSSSCG00000035601	4666	592.413	219.409	-1.12841	1.88e-06	0.000674451	Down	HAS3	-	GO:0005737//cytoplasm;GO:0005887//integral component of plasma membrane;GO:0036117//hyaluranon cable	GO:0050501//hyaluronan synthase activity	GO:0007155//cell adhesion;GO:0030213//hyaluronan biosynthetic process;GO:0045226//extracellular polysaccharide biosynthetic process;GO:0045893//positive regulation of transcription, DNA-templated;GO:0085029//extracellular matrix assembly;GO:1900106//positive regulation of hyaluranon cable assembly	gi|47575893|ref|NP_001001268.1|/0/hyaluronan synthase 3 [Sus scrofa]
ENSSSCG00000000892	3818	118.431	17.6493	-1.56611	2.13e-05	0.0049942	Down	HAL	ko01100//Metabolic pathways;ko00340//Histidine metabolism	GO:0005737//cytoplasm	GO:0004397//histidine ammonia-lyase activity	GO:0019556//histidine catabolic process to glutamate and formamide;GO:0019557//histidine catabolic process to glutamate and formate	gi|194037673|ref|XP_001925096.1|/0/PREDICTED: histidine ammonia-lyase [Sus scrofa]//gi|194037673|ref|XP_001925096.1|/0/PREDICTED: histidine ammonia-lyase [Sus scrofa]
ENSSSCG00000008003	1356	60.3451	236.114	1.61448	1.75e-07	9.94e-05	Up	HAGHL	ko00620//Pyruvate metabolism	-	GO:0004416//hydroxyacylglutathione hydrolase activity;GO:0046872//metal ion binding	GO:0019243//methylglyoxal catabolic process to D-lactate via S-lactoyl-glutathione	gi|311251725|ref|XP_003124751.1|/8.22508e-180/PREDICTED: hydroxyacylglutathione hydrolase-like protein isoform X1 [Sus scrofa]//gi|311251725|ref|XP_003124751.1|/2.21176e-180/PREDICTED: hydroxyacylglutathione hydrolase-like protein isoform X1 [Sus scrofa]
ENSSSCG00000003640	3028	168.497	43.9022	-1.27358	0.00014592	0.0211029	Down	GRIK3	ko04080//Neuroactive ligand-receptor interaction;ko04724//Glutamatergic synapse	GO:0005887//integral component of plasma membrane;GO:0030054//cell junction;GO:0043197//dendritic spine;GO:0045211//postsynaptic membrane	GO:0001640//adenylate cyclase inhibiting G-protein coupled glutamate receptor activity;GO:0005234//extracellular-glutamate-gated ion channel activity;GO:0015277//kainate selective glutamate receptor activity	GO:0007196//adenylate cyclase-inhibiting G-protein coupled glutamate receptor signaling pathway;GO:0034220//ion transmembrane transport;GO:0035235//ionotropic glutamate receptor signaling pathway;GO:0042391//regulation of membrane potential	gi|440908123|gb|ELR58181.1|/0/Glutamate receptor, ionotropic kainate 3, partial [Bos mutus]//gi|440908123|gb|ELR58181.1|/0/Glutamate receptor, ionotropic kainate 3, partial [Bos mutus]//gi|586538909|ref|XP_006924294.1|/0/PREDICTED: glutamate receptor ionotropic, kainate 3 [Pteropus alecto]
ENSSSCG00000012638	8067	146.115	43.919	-1.18805	0.000228738	0.0273752	Down	GRIA3	ko04080//Neuroactive ligand-receptor interaction;ko05202//Transcriptional misregulation in cancer;ko04024//cAMP signaling pathway;ko04728//Dopaminergic synapse;ko04713//Circadian entrainment;ko04724//Glutamatergic synapse;ko04723//Retrograde endocannabinoid signaling;ko05031//Amphetamine addiction;ko04730//Long-term depression;ko05033//Nicotine addiction	GO:0005654//nucleoplasm;GO:0014069//postsynaptic density;GO:0030054//cell junction;GO:0030666//endocytic vesicle membrane;GO:0032281//AMPA glutamate receptor complex;GO:0043083//synaptic cleft;GO:0043195//terminal bouton;GO:0043197//dendritic spine;GO:0043198//dendritic shaft;GO:0043204//perikaryon;GO:0045211//postsynaptic membrane	GO:0004971//AMPA glutamate receptor activity;GO:0005234//extracellular-glutamate-gated ion channel activity	GO:0007268//synaptic transmission;GO:0034220//ion transmembrane transport;GO:0035235//ionotropic glutamate receptor signaling pathway;GO:0060992//response to fungicide	gi|390480179|ref|XP_003735862.1|/0/1//gi|296236329|ref|XP_002763276.1|/0/1//gi|817261947|ref|XP_012330886.1|/0/1
ENSSSCG00000009517	1945	990.949	282.417	-1.23115	8.7e-05	0.0145979	Down	GPR183	-	GO:0005886//plasma membrane;GO:0016021//integral component of membrane	GO:0004930//G-protein coupled receptor activity;GO:0008142//oxysterol binding	GO:0002250//adaptive immune response;GO:0002313//mature B cell differentiation involved in immune response;GO:0006959//humoral immune response;GO:0007186//G-protein coupled receptor signaling pathway;GO:0030890//positive regulation of B cell proliferation;GO:0070374//positive regulation of ERK1 and ERK2 cascade	gi|848234228|gb|AKN24309.1|/0/G protein-coupled receptor 183 [Sus scrofa]//gi|848234228|gb|AKN24309.1|/0/G protein-coupled receptor 183 [Sus scrofa]
ENSSSCG00000034192	9308	35.9145	96.3341	1.20921	0.000128091	0.0192232	Up	GNAO1	ko04015//Rap1 signaling pathway;ko05145//Toxoplasmosis;ko04921//Oxytocin signaling pathway;ko05034//Alcoholism;ko04726//Serotonergic synapse;ko05142//Chagas disease (American trypanosomiasis);ko04728//Dopaminergic synapse;ko04915//Estrogen signaling pathway;ko04713//Circadian entrainment;ko04916//Melanogenesis;ko04724//Glutamatergic synapse;ko04725//Cholinergic synapse;ko04723//Retrograde endocan…	GO:0005834//heterotrimeric G-protein complex;GO:0030425//dendrite;GO:0043209//myelin sheath;GO:0044297//cell body	GO:0003924//GTPase activity;GO:0004871//signal transducer activity;GO:0005525//GTP binding;GO:0031683//G-protein beta/gamma-subunit complex binding;GO:0031821//G-protein coupled serotonin receptor binding;GO:0031852//mu-type opioid receptor binding;GO:0046872//metal ion binding;GO:0051430//corticotropin-releasing hormone receptor 1 binding	GO:0007188//adenylate cyclase-modulating G-protein coupled receptor signaling pathway;GO:0007212//dopamine receptor signaling pathway;GO:0007626//locomotory behavior;GO:0008016//regulation of heart contraction	gi|927137910|ref|XP_013850011.1|/0/PREDICTED: guanine nucleotide-binding protein G(o) subunit alpha [Sus scrofa]//gi|927137910|ref|XP_013850011.1|/0/PREDICTED: guanine nucleotide-binding protein G(o) subunit alpha [Sus scrofa]//gi|562838525|ref|XP_006148452.1|/0/PREDICTED: guanine nucleotide-binding protein G(o) subunit alpha isoform X2 [Tupaia chinensis]
ENSSSCG00000014012	27393	9575.35	2823.62	-1.22884	0.000114922	0.0179101	Down	GFPT2	ko01100//Metabolic pathways;ko04931//Insulin resistance;ko00520//Amino sugar and nucleotide sugar metabolism;ko00250//Alanine, aspartate and glutamate metabolism	-	GO:0004360//glutamine-fructose-6-phosphate transaminase (isomerizing) activity;GO:0030246//carbohydrate binding	GO:0005975//carbohydrate metabolic process;GO:0006002//fructose 6-phosphate metabolic process;GO:0006048//UDP-N-acetylglucosamine biosynthetic process;GO:0006541//glutamine metabolic process	gi|350580806|ref|XP_003123686.3|/0/PREDICTED: glutamine--fructose-6-phosphate aminotransferase [isomerizing] 2 [Sus scrofa]//gi|350580806|ref|XP_003123686.3|/0/PREDICTED: glutamine--fructose-6-phosphate aminotransferase [isomerizing] 2 [Sus scrofa]
ENSSSCG00000017343	5455	216.378	39.613	-1.62045	1.87e-06	0.000674451	Down	GFAP	ko04630//Jak-STAT signaling pathway	GO:0005737//cytoplasm;GO:0005882//intermediate filament;GO:0016020//membrane;GO:0043209//myelin sheath;GO:0044297//cell body;GO:0097450//astrocyte end-foot	GO:0001948//glycoprotein binding;GO:0005198//structural molecule activity	GO:0010625//positive regulation of Schwann cell proliferation;GO:0010977//negative regulation of neuron projection development;GO:0014002//astrocyte development;GO:0030198//extracellular matrix organization;GO:0031102//neuron projection regeneration;GO:0045109//intermediate filament organization;GO:0051580//regulation of neurotransmitter uptake;GO:0060020//Bergmann glial cell differentiation;GO:0…	gi|545857420|ref|XP_005668766.1|/0/PREDICTED: glial fibrillary acidic protein isoform X1 [Sus scrofa]//gi|346986349|ref|NP_001231326.1|/0/glial fibrillary acidic protein [Sus scrofa]//gi|346986349|ref|NP_001231326.1|/0/glial fibrillary acidic protein [Sus scrofa]//gi|346986349|ref|NP_001231326.1|/0/glial fibrillary acidic protein [Sus scrofa]//gi|346986349|ref|NP_001231326.1|/0/glial fibrillary a…
ENSSSCG00000012846	2497	1611.72	3615.93	1.1342	3.02e-05	0.0065756	Up	GATD1	-	GO:0070062//extracellular exosome	GO:0019172//glyoxalase III activity	GO:0019243//methylglyoxal catabolic process to D-lactate via S-lactoyl-glutathione;GO:0019249//lactate biosynthetic process	gi|545805593|ref|XP_005652839.1|/1.09557e-147/PREDICTED: Parkinson disease 7 domain-containing protein 1 isoform X2 [Sus scrofa]
ENSSSCG00000008809	6421	209.903	44.9871	-1.33023	0.000272418	0.0314101	Down	GABRG1	ko04080//Neuroactive ligand-receptor interaction;ko04723//Retrograde endocannabinoid signaling;ko05032//Morphine addiction;ko04727//GABAergic synapse;ko05033//Nicotine addiction	GO:0005886//plasma membrane;GO:0016021//integral component of membrane;GO:0030054//cell junction;GO:0045202//synapse;GO:1902711//GABA-A receptor complex	GO:0004890//GABA-A receptor activity;GO:0005230//extracellular ligand-gated ion channel activity	GO:0006821//chloride transport;GO:0007214//gamma-aminobutyric acid signaling pathway;GO:0007268//synaptic transmission;GO:0034220//ion transmembrane transport	gi|155372219|ref|NP_001094720.1|/0/gamma-aminobutyric acid receptor subunit gamma-1 precursor [Bos taurus]
ENSSSCG00000038824	7423	139.418	475.443	1.55055	8.07e-07	0.000336478	Up	FRRS1L	-	GO:0005886//plasma membrane;GO:0016021//integral component of membrane;GO:0030054//cell junction;GO:0045202//synapse	-	-	gi|385648274|ref|NP_001245311.1|/0/DOMON domain-containing protein FRRS1L [Sus scrofa]
ENSSSCG00000015212	2120	82.6806	12.8638	-1.40913	0.000145631	0.0211029	Down	FEZ1	-	GO:0005737//cytoplasm;GO:0005794//Golgi apparatus;GO:0005813//centrosome	GO:0043015//gamma-tubulin binding	GO:1902902//negative regulation of autophagosome assembly	gi|927178011|ref|XP_013834997.1|/0/PREDICTED: fasciculation and elongation protein zeta-1 [Sus scrofa]//gi|66792834|ref|NP_001019693.1|/0/fasciculation and elongation protein zeta-1 [Bos taurus]//gi|927178011|ref|XP_013834997.1|/0/PREDICTED: fasciculation and elongation protein zeta-1 [Sus scrofa]//gi|66792834|ref|NP_001019693.1|/0/fasciculation and elongation protein zeta-1 [Bos taurus]
ENSSSCG00000014935	13856	285.161	25.3664	-1.55892	3.38e-05	0.00704463	Down	FAT3	-	GO:0005886//plasma membrane;GO:0016021//integral component of membrane	GO:0005509//calcium ion binding	GO:0007156//homophilic cell adhesion via plasma membrane adhesion molecules	gi|755768492|ref|XP_011284836.1|/0/PREDICTED: protocadherin Fat 3 [Felis catus]//gi|958823372|ref|XP_014690836.1|/0/PREDICTED: protocadherin Fat 3 [Equus asinus]//gi|511887725|ref|XP_004763628.1|/0/PREDICTED: protocadherin Fat 3 isoform X1 [Mustela putorius furo]//gi|958823372|ref|XP_014690836.1|/0/PREDICTED: protocadherin Fat 3 [Equus asinus]//gi|511887725|ref|XP_004763628.1|/0/PREDICTED: protoc…
ENSSSCG00000036755	2392	422.701	1680.49	1.63151	8.33e-07	0.00034255	Up	FAM46B	ko04810//Regulation of actin cytoskeleton;ko05205//Proteoglycans in cancer;ko04919//Thyroid hormone signaling pathway;ko04024//cAMP signaling pathway;ko04261//Adrenergic signaling in cardiomyocytes;ko04970//Salivary secretion;ko04260//Cardiac muscle contraction;ko04971//Gastric acid secretion;ko04972//Pancreatic secretion;ko04976//Bile secretion	-	-	-	gi|927146894|ref|XP_003127772.3|/0/PREDICTED: protein FAM46B [Sus scrofa]
ENSSSCG00000035958	5640	753.352	220.696	-1.19547	0.000187662	0.0242346	Down	EVA1A	-	GO:0005886//plasma membrane;GO:0043231//intracellular membrane-bounded organelle;GO:0044444//cytoplasmic part	-	-	gi|724821750|ref|XP_010361106.1|/3.6733e-52/1//gi|724821750|ref|XP_010361106.1|/3.6733e-52/1
ENSSSCG00000005852	6594	186.637	781.445	1.76662	2.01e-08	1.59e-05	Up	ENTPD8	ko05169//Epstein-Barr virus infection;ko00230//Purine metabolism;ko00240//Pyrimidine metabolism	GO:0005886//plasma membrane;GO:0016021//integral component of membrane	GO:0005524//ATP binding;GO:0017110//nucleoside-diphosphatase activity;GO:0017111//nucleoside-triphosphatase activity;GO:0046872//metal ion binding	GO:0009124//nucleoside monophosphate biosynthetic process;GO:0009133//nucleoside diphosphate biosynthetic process	gi|335281293|ref|XP_003122402.2|/0/PREDICTED: ectonucleoside triphosphate diphosphohydrolase 8 [Sus scrofa]//gi|335281293|ref|XP_003122402.2|/0/PREDICTED: ectonucleoside triphosphate diphosphohydrolase 8 [Sus scrofa]//gi|335281293|ref|XP_003122402.2|/0/PREDICTED: ectonucleoside triphosphate diphosphohydrolase 8 [Sus scrofa]
ENSSSCG00000021818	3601	1605.09	665.454	-1.02047	5.46e-06	0.00170253	Down	ENOX1	-	-	GO:0000166//nucleotide binding;GO:0003676//nucleic acid binding	-	gi|955524153|ref|XP_014645450.1|/0/PREDICTED: ecto-NOX disulfide-thiol exchanger 1 [Ceratotherium simum simum]//gi|955524153|ref|XP_014645450.1|/0/PREDICTED: ecto-NOX disulfide-thiol exchanger 1 [Ceratotherium simum simum]//gi|830027631|ref|XP_012616463.1|/0/1
ENSSSCG00000040815	5328	404.521	144.935	-1.07424	0.000109887	0.0174125	Down	DUSP5	ko04010//MAPK signaling pathway;ko05202//Transcriptional misregulation in cancer;ko04726//Serotonergic synapse	GO:0005654//nucleoplasm	GO:0004725//protein tyrosine phosphatase activity;GO:0005515//protein binding;GO:0017017//MAP kinase tyrosine/serine/threonine phosphatase activity	GO:0000187//activation of MAPK activity;GO:0000188//inactivation of MAPK activity;GO:0001706//endoderm formation;GO:0035335//peptidyl-tyrosine dephosphorylation	gi|747165409|ref|NP_001291211.1|/0/dual specificity protein phosphatase 5 [Bos taurus]
ENSSSCG00000004675	5847	422.651	149.077	-1.05404	0.000494417	0.0480262	Down	DUOX1	ko04918//Thyroid hormone synthesis	GO:0016021//integral component of membrane;GO:0016324//apical plasma membrane	GO:0004601//peroxidase activity;GO:0005509//calcium ion binding;GO:0016174//NAD(P)H oxidase activity;GO:0020037//heme binding;GO:0050661//NADP binding	GO:0006590//thyroid hormone generation;GO:0006979//response to oxidative stress;GO:0019221//cytokine-mediated signaling pathway;GO:0042335//cuticle development;GO:0042446//hormone biosynthetic process;GO:0042554//superoxide anion generation;GO:0042744//hydrogen peroxide catabolic process;GO:0050665//hydrogen peroxide biosynthetic process;GO:0051591//response to cAMP;GO:0055114//oxidation-reductio…	gi|47523002|ref|NP_999261.1|/0/dual oxidase 1 precursor [Sus scrofa]//gi|47523002|ref|NP_999261.1|/0/dual oxidase 1 precursor [Sus scrofa]//gi|47523002|ref|NP_999261.1|/0/dual oxidase 1 precursor [Sus scrofa]
ENSSSCG00000005233	4753	821.667	2117.41	1.16358	8.93e-05	0.0147285	Up	DMRT2	-	GO:0005634//nucleus;GO:0016021//integral component of membrane	GO:0000977//RNA polymerase II regulatory region sequence-specific DNA binding;GO:0000987//core promoter proximal region sequence-specific DNA binding;GO:0003700//transcription factor activity, sequence-specific DNA binding;GO:0042803//protein homodimerization activity;GO:0046872//metal ion binding	GO:0007548//sex differentiation;GO:0014807//regulation of somitogenesis;GO:0045944//positive regulation of transcription from RNA polymerase II promoter;GO:0048706//embryonic skeletal system development;GO:2000287//positive regulation of myotome development	gi|300797961|ref|NP_001179302.1|/0/doublesex- and mab-3-related transcription factor 2 [Bos taurus]
ENSSSCG00000001906	5400	367.034	48.2156	-1.52208	4.04e-05	0.00811883	Down	CYP1A1	ko01100//Metabolic pathways;ko00830//Retinol metabolism;ko05204//Chemical carcinogenesis;ko00140//Steroid hormone biosynthesis;ko00980//Metabolism of xenobiotics by cytochrome P450;ko04913//Ovarian steroidogenesis;ko00380//Tryptophan metabolism	GO:0005789//endoplasmic reticulum membrane;GO:0031090//organelle membrane	GO:0005506//iron ion binding;GO:0020037//heme binding;GO:0070330//aromatase activity;GO:0070576//vitamin D 24-hydroxylase activity	GO:0009308//amine metabolic process;GO:0009404//toxin metabolic process;GO:0009636//response to toxic substance;GO:0017144//drug metabolic process;GO:0046483//heterocycle metabolic process;GO:0050665//hydrogen peroxide biosynthetic process;GO:0055114//oxidation-reduction process;GO:0071407//cellular response to organic cyclic compound	gi|47523874|ref|NP_999577.1|/0/cytochrome P450 1A1 [Sus scrofa]//gi|47523874|ref|NP_999577.1|/0/cytochrome P450 1A1 [Sus scrofa]
ENSSSCG00000010929	3880	21.6261	115.367	1.42346	0.000125361	0.0190147	Up	CYB5R1	ko00520//Amino sugar and nucleotide sugar metabolism	GO:0005739//mitochondrion;GO:0016020//membrane;GO:0070062//extracellular exosome	GO:0004128//cytochrome-b5 reductase activity, acting on NAD(P)H	GO:0055114//oxidation-reduction process;GO:1903955//positive regulation of protein targeting to mitochondrion	gi|345199319|ref|NP_001230847.1|/0/cytochrome b5 reductase 1 [Sus scrofa]//gi|345199319|ref|NP_001230847.1|/0/cytochrome b5 reductase 1 [Sus scrofa]
ENSSSCG00000034973	6206	14370.8	2312.7	-2.26879	1.7e-27	1.6e-23	Down	CXCL12	ko05200//Pathways in cancer;ko04360//Axon guidance;ko04670//Leukocyte transendothelial migration;ko04060//Cytokine-cytokine receptor interaction;ko04062//Chemokine signaling pathway;ko04064//NF-kappa B signaling pathway;ko05323//Rheumatoid arthritis;ko04672//Intestinal immune network for IgA production	GO:0005615//extracellular space;GO:0009897//external side of plasma membrane;GO:0070062//extracellular exosome	GO:0008009//chemokine activity;GO:0008083//growth factor activity;GO:0042056//chemoattractant activity;GO:0045236//CXCR chemokine receptor binding	GO:0006955//immune response;GO:0007411//axon guidance;GO:0045785//positive regulation of cell adhesion;GO:0050930//induction of positive chemotaxis;GO:0070098//chemokine-mediated signaling pathway;GO:0090026//positive regulation of monocyte chemotaxis;GO:1902230//negative regulation of intrinsic apoptotic signaling pathway in response to DNA damage;GO:1903237//negative regulation of leukocyte tet…	gi|57528015|ref|NP_001009580.1|/3.97468e-49/stromal cell-derived factor 1 precursor [Sus scrofa]//gi|57528015|ref|NP_001009580.1|/3.00604e-49/stromal cell-derived factor 1 precursor [Sus scrofa]
ENSSSCG00000032151	2158	1059.54	173.096	-1.72971	4.49e-07	0.000223555	Down	CPZ	-	GO:0005578//proteinaceous extracellular matrix;GO:0005615//extracellular space;GO:0070062//extracellular exosome	GO:0004181//metallocarboxypeptidase activity;GO:0004185//serine-type carboxypeptidase activity;GO:0008270//zinc ion binding	GO:0006518//peptide metabolic process;GO:0016055//Wnt signaling pathway;GO:0016485//protein processing	gi|296486344|tpg|DAA28457.1|/0/TPA: carboxypeptidase Z [Bos taurus]
ENSSSCG00000009413	2091	63.0657	12.7451	-1.39509	8.43e-05	0.014406	Down	CPB2	ko04974//Protein digestion and absorption;ko04972//Pancreatic secretion;ko04610//Complement and coagulation cascades	-	-	-	gi|194040626|ref|XP_001929181.1|/0/PREDICTED: carboxypeptidase B2 [Sus scrofa]
ENSSSCG00000011527	6050	677.05	241.971	-1.1014	5.06e-05	0.00951275	Down	CNTN4	-	-	-	GO:0007155//cell adhesion;GO:0007411//axon guidance;GO:0045665//negative regulation of neuron differentiation	gi|671021159|ref|XP_008701401.1|/0/PREDICTED: contactin-4 [Ursus maritimus]
ENSSSCG00000000789	8881	789.064	152.69	-1.73452	4.93e-08	3.59e-05	Down	CNTN1	ko04514//Cell adhesion molecules (CAMs);ko04360//Axon guidance;ko05120//Epithelial cell signaling in Helicobacter pylori infection	GO:0005886//plasma membrane;GO:0016021//integral component of membrane;GO:0031225//anchored component of membrane;GO:0043209//myelin sheath;GO:0070062//extracellular exosome	GO:0001948//glycoprotein binding;GO:0030246//carbohydrate binding	GO:0007155//cell adhesion;GO:0007219//Notch signaling pathway;GO:0010628//positive regulation of gene expression;GO:0010765//positive regulation of sodium ion transport;GO:0010976//positive regulation of neuron projection development;GO:0021549//cerebellum development	gi|350584500|ref|XP_003355665.2|/0/PREDICTED: contactin-1 isoform X1 [Sus scrofa]//gi|528754425|gb|EPY74084.1|/0/contactin-1 isoform 2 [Camelus ferus]//gi|350584500|ref|XP_003355665.2|/0/PREDICTED: contactin-1 isoform X1 [Sus scrofa]//gi|927133599|ref|XP_013853400.1|/0/PREDICTED: contactin-1 isoform X2 [Sus scrofa]//gi|350584500|ref|XP_003355665.2|/0/PREDICTED: contactin-1 isoform X1 [Sus scrofa]…
ENSSSCG00000007718	1749	1407.89	86.9297	-1.99955	8.38e-08	5.28e-05	Down	CLDN4	ko04514//Cell adhesion molecules (CAMs);ko04670//Leukocyte transendothelial migration;ko05130//Pathogenic Escherichia coli infection;ko04530//Tight junction;ko05160//Hepatitis C	GO:0016021//integral component of membrane;GO:0030054//cell junction;GO:0044459	-	-	gi|239504564|ref|NP_001155109.1|/1.62313e-107/claudin-4 [Sus scrofa]
ENSSSCG00000011747	2057	173.194	27.9136	-1.30228	0.000484924	0.0472659	Down	CLDN11	ko04514//Cell adhesion molecules (CAMs);ko04670//Leukocyte transendothelial migration;ko05130//Pathogenic Escherichia coli infection;ko04530//Tight junction;ko05160//Hepatitis C	GO:0005886//plasma membrane;GO:0005923//bicellular tight junction;GO:0016021//integral component of membrane;GO:0043209//myelin sheath;GO:0045178//basal part of cell;GO:0070062//extracellular exosome	GO:0005198//structural molecule activity	GO:0007155//cell adhesion;GO:0007283//spermatogenesis;GO:0008366//axon ensheathment	gi|239504566|ref|NP_001155113.1|/3.46658e-124/claudin-11 [Sus scrofa]
ENSSSCG00000040581	6378	983.728	166.127	-1.74452	1.04e-07	6.43e-05	Down	CISH	ko04630//Jak-STAT signaling pathway;ko04917//Prolactin signaling pathway	GO:0005737//cytoplasm;GO:0005886//plasma membrane	GO:0004860//protein kinase inhibitor activity	GO:0006469//negative regulation of protein kinase activity;GO:0007205//protein kinase C-activating G-protein coupled receptor signaling pathway;GO:0016567//protein ubiquitination;GO:0019221//cytokine-mediated signaling pathway;GO:0046426//negative regulation of JAK-STAT cascade;GO:0046627//negative regulation of insulin receptor signaling pathway	gi|937575846|ref|NP_001302717.1|/1.42598e-153/cytokine inducible SH2-containing protein [Sus scrofa]//gi|937575846|ref|NP_001302717.1|/1.42598e-153/cytokine inducible SH2-containing protein [Sus scrofa]
ENSSSCG00000004885	6189	595.994	227.318	-1.08691	1.04e-05	0.00287751	Down	CDH19	-	GO:0005886//plasma membrane;GO:0016021//integral component of membrane	GO:0005509//calcium ion binding	GO:0007156//homophilic cell adhesion via plasma membrane adhesion molecules	gi|311245212|ref|XP_003121743.1|/0/PREDICTED: cadherin-19 isoform X1 [Sus scrofa]
ENSSSCG00000006106	5382	75.5323	13.4413	-1.47306	4.35e-05	0.00840238	Down	CDH17	ko05200//Pathways in cancer;ko04015//Rap1 signaling pathway;ko04514//Cell adhesion molecules (CAMs);ko05100//Bacterial invasion of epithelial cells;ko05130//Pathogenic Escherichia coli infection;ko04390//Hippo signaling pathway;ko04520//Adherens junction;ko05218//Melanoma;ko05219//Bladder cancer;ko05213//Endometrial cancer;ko05216//Thyroid cancer	GO:0009986//cell surface;GO:0016021//integral component of membrane;GO:0016323//basolateral plasma membrane	GO:0005178//integrin binding;GO:0005427//proton-dependent oligopeptide secondary active transmembrane transporter activity;GO:0005509//calcium ion binding	GO:0002314//germinal center B cell differentiation;GO:0002315//marginal zone B cell differentiation;GO:0007156//homophilic cell adhesion via plasma membrane adhesion molecules;GO:0007229//integrin-mediated signaling pathway;GO:0016339//calcium-dependent cell-cell adhesion via plasma membrane cell adhesion molecules;GO:0033626//positive regulation of integrin activation by cell surface receptor li…	gi|194037042|ref|XP_001927136.1|/0/PREDICTED: cadherin-17 [Sus scrofa]//gi|194037042|ref|XP_001927136.1|/0/PREDICTED: cadherin-17 [Sus scrofa]//gi|194037042|ref|XP_001927136.1|/0/PREDICTED: cadherin-17 [Sus scrofa]//gi|194037042|ref|XP_001927136.1|/0/PREDICTED: cadherin-17 [Sus scrofa]//gi|194037042|ref|XP_001927136.1|/0/PREDICTED: cadherin-17 [Sus scrofa]//gi|194037042|ref|XP_001927136.1|/0/PRED…
ENSSSCG00000025652	5604	25.6587	198.558	2.32662	1.03e-12	1.95e-09	Up	CDH1	ko05200//Pathways in cancer;ko04151//PI3K-Akt signaling pathway;ko04015//Rap1 signaling pathway;ko04810//Regulation of actin cytoskeleton;ko04514//Cell adhesion molecules (CAMs);ko05205//Proteoglycans in cancer;ko04145//Phagosome;ko04510//Focal adhesion;ko04360//Axon guidance;ko05414//Dilated cardiomyopathy;ko04670//Leukocyte transendothelial migration;ko04611//Platelet activation;ko05410//Hypert…	GO:0005768//endosome;GO:0005802//trans-Golgi network;GO:0005913//cell-cell adherens junction;GO:0005925//focal adhesion;GO:0009898//cytoplasmic side of plasma membrane;GO:0016021//integral component of membrane;GO:0016235//aggresome;GO:0016328//lateral plasma membrane;GO:0016342//catenin complex;GO:0016600//flotillin complex;GO:0030027//lamellipodium;GO:0030864//cortical actin cytoskeleton;GO:004…	GO:0001948//glycoprotein binding;GO:0005509//calcium ion binding;GO:0008013//beta-catenin binding;GO:0030506//ankyrin binding;GO:0032794//GTPase activating protein binding;GO:0045295//gamma-catenin binding;GO:0050839//cell adhesion molecule binding	GO:0007156//homophilic cell adhesion via plasma membrane adhesion molecules;GO:0022408//negative regulation of cell-cell adhesion;GO:0034332//adherens junction organization;GO:0042993//positive regulation of transcription factor import into nucleus;GO:0045893//positive regulation of transcription, DNA-templated;GO:0071285//cellular response to lithium ion;GO:0071681//cellular response to indole-3…	gi|251823933|ref|NP_001156532.1|/0/cadherin-1 precursor [Sus scrofa]//gi|251823933|ref|NP_001156532.1|/0/cadherin-1 precursor [Sus scrofa]//gi|251823933|ref|NP_001156532.1|/0/cadherin-1 precursor [Sus scrofa]//gi|251823933|ref|NP_001156532.1|/0/cadherin-1 precursor [Sus scrofa]//gi|251823933|ref|NP_001156532.1|/0/cadherin-1 precursor [Sus scrofa]
ENSSSCG00000038096	2111	288.048	80.762	-1.33361	2.12e-05	0.0049942	Down	CCL4	ko04060//Cytokine-cytokine receptor interaction;ko04062//Chemokine signaling pathway;ko04064//NF-kappa B signaling pathway;ko05132//Salmonella infection;ko04620//Toll-like receptor signaling pathway;ko04623//Cytosolic DNA-sensing pathway	GO:0005615//extracellular space	GO:0008009//chemokine activity;GO:0048020//CCR chemokine receptor binding	GO:0002548//monocyte chemotaxis;GO:0007186//G-protein coupled receptor signaling pathway;GO:0030593//neutrophil chemotaxis;GO:0035690//cellular response to drug;GO:0043547//positive regulation of GTPase activity;GO:0048247//lymphocyte chemotaxis;GO:0050729//positive regulation of inflammatory response;GO:0070098//chemokine-mediated signaling pathway;GO:0070374//positive regulation of ERK1 and ERK…	gi|47523286|ref|NP_998944.1|/6.02149e-54/C-C motif chemokine 4 precursor [Sus scrofa]
ENSSSCG00000023186	1902	1614.68	583.996	-1.16517	8.96e-07	0.000363204	Down	CA4	ko04964//Proximal tubule bicarbonate reclamation;ko00910//Nitrogen metabolism	-	-	-	gi|345199324|ref|NP_001230849.1|/0/carbonic anhydrase 4 precursor [Sus scrofa]
ENSSSCG00000016856	2629	122.444	1.95309	-1.94589	1.97e-07	0.000107669	Down	C9	ko05146//Amoebiasis;ko05322//Systemic lupus erythematosus;ko04610//Complement and coagulation cascades;ko05020//Prion diseases	GO:0005579//membrane attack complex;GO:0005737//cytoplasm;GO:0070062//extracellular exosome;GO:0072562//blood microparticle	-	GO:0006956//complement activation;GO:0045087//innate immune response	gi|148233690|ref|NP_001090917.1|/0/complement component C9 precursor [Sus scrofa]//gi|148233690|ref|NP_001090917.1|/0/complement component C9 precursor [Sus scrofa]//gi|148233690|ref|NP_001090917.1|/0/complement component C9 precursor [Sus scrofa]//gi|148233690|ref|NP_001090917.1|/0/complement component C9 precursor [Sus scrofa]
ENSSSCG00000016859	2526	3480.96	380.893	-2.58309	2.72e-21	1.93e-17	Down	C7	ko05322//Systemic lupus erythematosus;ko04610//Complement and coagulation cascades;ko05020//Prion diseases	GO:0005579//membrane attack complex;GO:0070062//extracellular exosome	-	GO:0006957//complement activation, alternative pathway;GO:0006958//complement activation, classical pathway;GO:0019835//cytolysis	gi|47523630|ref|NP_999447.1|/0/complement component C7 precursor [Sus scrofa]
ENSSSCG00000033941	1986	251.68	80.7932	-1.17989	5.42e-05	0.0100392	Down	C2orf88	ko01100//Metabolic pathways;ko01200//Carbon metabolism;ko00280//Valine, leucine and isoleucine degradation;ko00410//beta-Alanine metabolism;ko00640//Propanoate metabolism	GO:0005654//nucleoplasm;GO:0005886//plasma membrane	GO:0016301//kinase activity;GO:0034237//protein kinase A regulatory subunit binding	GO:0016310//phosphorylation	gi|116004201|ref|NP_001070459.1|/3.16485e-55/small membrane A-kinase anchor protein [Bos taurus]
ENSSSCG00000011043	3280	287.45	40.2837	-2.16357	5.22e-14	1.35e-10	Down	C1QL3	ko04932//Non-alcoholic fatty liver disease (NAFLD);ko04152//AMPK signaling pathway;ko03320//PPAR signaling pathway;ko04920//Adipocytokine signaling pathway;ko04930//Type II diabetes mellitus	GO:0005576//extracellular region	GO:0005515//protein binding	GO:0050807//regulation of synapse organization	gi|1003749735|ref|XP_015708982.1|/2.93097e-128/1
ENSSSCG00000001916	1491	122.508	253.518	1.03521	9.34e-05	0.0153195	Up	C15orf59	-	-	-	-	gi|194038705|ref|XP_001928647.1|/0/PREDICTED: UPF0583 protein C15orf59 homolog [Sus scrofa]
ENSSSCG00000036572	5086	656.545	165.553	-1.59886	3.2e-11	4.53e-08	Down	BCO1	ko01100//Metabolic pathways;ko00830//Retinol metabolism	-	GO:0003834//beta-carotene 15,15'-monooxygenase activity;GO:0004497//monooxygenase activity	GO:0042574//retinal metabolic process;GO:0055114//oxidation-reduction process;GO:1901810//beta-carotene metabolic process	gi|211578376|ref|NP_001129984.1|/0/beta,beta-carotene 15,15'-monooxygenase [Sus scrofa]//gi|211578376|ref|NP_001129984.1|/0/beta,beta-carotene 15,15'-monooxygenase [Sus scrofa]
ENSSSCG00000010800	3223	317.357	116.135	-1.07577	0.000257972	0.030236	Down	B3GALT2	ko01100//Metabolic pathways;ko00601//Glycosphingolipid biosynthesis - lacto and neolacto series	GO:0000139//Golgi membrane;GO:0016021//integral component of membrane	GO:0008499//UDP-galactose:beta-N-acetylglucosamine beta-1,3-galactosyltransferase activity	GO:0006486//protein glycosylation;GO:0009312//oligosaccharide biosynthetic process	gi|731276131|ref|XP_010607049.1|/0/1
ENSSSCG00000017265	4153	205.415	458.126	1.045	0.000193361	0.0244843	Up	AXIN2	ko05200//Pathways in cancer;ko04390//Hippo signaling pathway;ko04550//Signaling pathways regulating pluripotency of stem cells;ko04310//Wnt signaling pathway;ko05210//Colorectal cancer;ko05213//Endometrial cancer;ko05217//Basal cell carcinoma	GO:0005654//nucleoplasm;GO:0005794//Golgi apparatus;GO:0005813//centrosome;GO:0005829//cytosol;GO:0005881//cytoplasmic microtubule;GO:0005886//plasma membrane;GO:0005938//cell cortex;GO:0014069//postsynaptic density;GO:0030877//beta-catenin destruction complex	GO:0005096//GTPase activator activity;GO:0008013//beta-catenin binding;GO:0019901//protein kinase binding;GO:0031625//ubiquitin protein ligase binding;GO:0070016//armadillo repeat domain binding;GO:0070411//I-SMAD binding	GO:0001934//positive regulation of protein phosphorylation;GO:0001957//intramembranous ossification;GO:0003139//secondary heart field specification;GO:0003413//chondrocyte differentiation involved in endochondral bone morphogenesis;GO:0006355//regulation of transcription, DNA-templated;GO:0008285//negative regulation of cell proliferation;GO:0009950//dorsal/ventral axis specification;GO:0010718//…	gi|297701571|ref|XP_002827783.1|/0/1//gi|675717688|ref|XP_008962986.1|/0/1
ENSSSCG00000010654	4149	1163.42	465.221	-1.03376	2.43e-05	0.00552109	Down	ATRNL1	ko05200//Pathways in cancer;ko04151//PI3K-Akt signaling pathway;ko04015//Rap1 signaling pathway;ko04810//Regulation of actin cytoskeleton;ko04514//Cell adhesion molecules (CAMs);ko05205//Proteoglycans in cancer;ko04145//Phagosome;ko04510//Focal adhesion;ko04360//Axon guidance;ko05414//Dilated cardiomyopathy;ko04670//Leukocyte transendothelial migration;ko04611//Platelet activation;ko05410//Hypert…	GO:0016021//integral component of membrane	GO:0030246//carbohydrate binding	GO:0007186//G-protein coupled receptor signaling pathway	gi|602718986|ref|XP_007469668.1|/0/PREDICTED: attractin-like protein 1 [Lipotes vexillifer]//gi|795344772|ref|XP_011783217.1|/0/1
ENSSSCG00000039673	5214	35.0795	117.621	1.26289	0.000292741	0.0328194	Up	ASB16	-	GO:0005622//intracellular	-	GO:0016567//protein ubiquitination;GO:0035556//intracellular signal transduction	gi|155372099|ref|NP_001094658.1|/0/ankyrin repeat and SOCS box protein 16 [Bos taurus]
ENSSSCG00000040513	4815	4833.49	1828.87	-1.0705	4.57e-05	0.00869657	Down	AQP3	ko04962//Vasopressin-regulated water reabsorption	GO:0005634//nucleus;GO:0005737//cytoplasm;GO:0005887//integral component of plasma membrane;GO:0005911//cell-cell junction;GO:0016323//basolateral plasma membrane	GO:0015204//urea transmembrane transporter activity;GO:0015250//water channel activity;GO:0015254//glycerol channel activity	GO:0002684//positive regulation of immune system process;GO:0009992//cellular water homeostasis;GO:0015793//glycerol transport;GO:0032526//response to retinoic acid;GO:0034219//carbohydrate transmembrane transport;GO:0034220//ion transmembrane transport;GO:0042476//odontogenesis;GO:0070295//renal water absorption;GO:0071918//urea transmembrane transport	gi|296439521|sp|A9Y006.1|AQP3_PIG/5.56619e-171/RecName: Full=Aquaporin-3; AltName: Full=Aquaglyceroporin-3//gi|158819036|ref|NP_001103642.1|/0/aquaporin-3 [Sus scrofa]
ENSSSCG00000033190	3872	6248.35	13732.2	1.22325	3.65e-12	6.47e-09	Up	AQP1	ko04976//Bile secretion;ko04924//Renin secretion;ko04964//Proximal tubule bicarbonate reclamation	GO:0005887//integral component of plasma membrane;GO:0009925//basal plasma membrane;GO:0016324//apical plasma membrane;GO:0020003//symbiont-containing vacuole;GO:0030424//axon;GO:0031526//brush border membrane;GO:0031965//nuclear membrane;GO:0032127//dense core granule membrane;GO:0042383//sarcolemma;GO:0070062//extracellular exosome	GO:0005223//intracellular cGMP activated cation channel activity;GO:0005267//potassium channel activity;GO:0008519//ammonium transmembrane transporter activity;GO:0015250//water channel activity;GO:0015254//glycerol channel activity;GO:0030184//nitric oxide transmembrane transporter activity;GO:0035379//carbon dioxide transmembrane transporter activity;GO:0046875//ephrin receptor binding	GO:0003094//glomerular filtration;GO:0006182//cGMP biosynthetic process;GO:0009992//cellular water homeostasis;GO:0015793//glycerol transport;GO:0019233//sensory perception of pain;GO:0021670//lateral ventricle development;GO:0030185//nitric oxide transport;GO:0030335//positive regulation of cell migration;GO:0030950//establishment or maintenance of actin cytoskeleton polarity;GO:0033363//secreto…	gi|47523958|ref|NP_999619.1|/1.59482e-179/aquaporin-1 [Sus scrofa]
ENSSSCG00000015798	2174	63.4816	136.728	1.02942	0.000362889	0.0389885	Up	ANKRD37	ko05205//Proteoglycans in cancer	GO:0005634//nucleus;GO:0005737//cytoplasm	-	-	gi|927209606|ref|XP_013839506.1|/2.09822e-107/PREDICTED: ankyrin repeat domain-containing protein 37 [Sus scrofa]
ENSSSCG00000013599	1954	18911.8	2402.53	-1.96391	6.63e-09	6.48e-06	Down	ANGPTL4	ko03320//PPAR signaling pathway	GO:0005578//proteinaceous extracellular matrix;GO:0072562//blood microparticle	GO:0004857//enzyme inhibitor activity;GO:0030297//transmembrane receptor protein tyrosine kinase activator activity;GO:0030971//receptor tyrosine kinase binding	GO:0007171//activation of transmembrane receptor protein tyrosine kinase activity;GO:0007219//Notch signaling pathway;GO:0016525//negative regulation of angiogenesis;GO:0030154//cell differentiation;GO:0043536//positive regulation of blood vessel endothelial cell migration;GO:0043537//negative regulation of blood vessel endothelial cell migration;GO:0045766//positive regulation of angiogenesis;GO…	gi|134047696|sp|Q2TNK5.2|ANGL4_PIG/0/RecName: Full=Angiopoietin-related protein 4; AltName: Full=Angiopoietin-like protein 4; Flags: Precursor
ENSSSCG00000004918	7456	372.61	21.6247	-2.01018	7.15e-08	4.83e-05	Down	ALPK2	-	-	-	-	gi|927097104|ref|XP_013848750.1|/0/PREDICTED: alpha-protein kinase 2 isoform X3 [Sus scrofa]//gi|927097102|ref|XP_013848749.1|/0/PREDICTED: alpha-protein kinase 2 isoform X2 [Sus scrofa]//gi|927097102|ref|XP_013848749.1|/0/PREDICTED: alpha-protein kinase 2 isoform X2 [Sus scrofa]
ENSSSCG00000009889	3674	1576.41	4939.77	1.66849	1.6e-19	7.58e-16	Up	ALDH2	ko01100//Metabolic pathways;ko00310//Lysine degradation;ko00561//Glycerolipid metabolism;ko00330//Arginine and proline metabolism;ko00010//Glycolysis / Gluconeogenesis;ko00280//Valine, leucine and isoleucine degradation;ko00620//Pyruvate metabolism;ko00380//Tryptophan metabolism;ko00071//Fatty acid degradation;ko00410//beta-Alanine metabolism;ko00040//Pentose and glucuronate interconversions;ko00…	GO:0005759//mitochondrial matrix	GO:0004029//aldehyde dehydrogenase (NAD) activity	GO:0006068//ethanol catabolic process;GO:0055114//oxidation-reduction process	gi|113205888|ref|NP_001038076.1|/0/aldehyde dehydrogenase, mitochondrial precursor [Sus scrofa]//gi|591367056|ref|XP_007058380.1|/0/1//gi|113205888|ref|NP_001038076.1|/0/aldehyde dehydrogenase, mitochondrial precursor [Sus scrofa]//gi|113205888|ref|NP_001038076.1|/0/aldehyde dehydrogenase, mitochondrial precursor [Sus scrofa]
ENSSSCG00000025578	4043	2153.79	321.588	-1.56491	1.87e-05	0.00453556	Down	ALDH1A2	ko01100//Metabolic pathways;ko00830//Retinol metabolism	GO:0005829//cytosol;GO:0048471//perinuclear region of cytoplasm	GO:0001758//retinal dehydrogenase activity;GO:0004028//3-chloroallyl aldehyde dehydrogenase activity;GO:0004029//aldehyde dehydrogenase (NAD) activity;GO:0016918//retinal binding	GO:0001568//blood vessel development;GO:0001822//kidney development;GO:0001889//liver development;GO:0001936//regulation of endothelial cell proliferation;GO:0003007//heart morphogenesis;GO:0006776//vitamin A metabolic process;GO:0007494//midgut development;GO:0008284//positive regulation of cell proliferation;GO:0008285//negative regulation of cell proliferation;GO:0009855//determination of bila…	gi|559767218|ref|NP_001274018.1|/0/retinal dehydrogenase 2 [Canis lupus familiaris]//gi|635135527|ref|XP_008014654.1|/0/1
ENSSSCG00000012730	4163	193.373	41.1729	-1.44063	2.76e-05	0.00615305	Down	AFF2	-	-	-	-	gi|927220281|ref|XP_013839485.1|/0/PREDICTED: AF4/FMR2 family member 2 isoform X5 [Sus scrofa]//gi|927220289|ref|XP_013839500.1|/0/PREDICTED: AF4/FMR2 family member 2 isoform X9 [Sus scrofa]//gi|927220281|ref|XP_013839485.1|/0/PREDICTED: AF4/FMR2 family member 2 isoform X5 [Sus scrofa]
ENSSSCG00000038598	2050	707.237	91.4244	-2.05212	5.69e-10	6.72e-07	Down	ADRB2	ko04144//Endocytosis;ko04080//Neuroactive ligand-receptor interaction;ko04020//Calcium signaling pathway;ko04024//cAMP signaling pathway;ko04022//cGMP-PKG signaling pathway;ko04261//Adrenergic signaling in cardiomyocytes;ko04970//Salivary secretion;ko04924//Renin secretion;ko04923//Regulation of lipolysis in adipocytes	GO:0005634//nucleus;GO:0005769//early endosome;GO:0005887//integral component of plasma membrane;GO:0016324//apical plasma membrane;GO:0043235//receptor complex	GO:0004941//beta2-adrenergic receptor activity;GO:0008179//adenylate cyclase binding;GO:0015459//potassium channel regulator activity;GO:0042803//protein homodimerization activity;GO:0051379//epinephrine binding;GO:0051380//norepinephrine binding	GO:0002024//diet induced thermogenesis;GO:0002025//vasodilation by norepinephrine-epinephrine involved in regulation of systemic arterial blood pressure;GO:0002028//regulation of sodium ion transport;GO:0002032//desensitization of G-protein coupled receptor protein signaling pathway by arrestin;GO:0006898//receptor-mediated endocytosis;GO:0007190//activation of adenylate cyclase activity;GO:00072…	gi|153608170|dbj|BAF74068.1|/0/beta-2 adrenergic receptor [Sus scrofa]
ENSSSCG00000015249	2709	99.1074	25.3027	-1.31824	6.18e-05	0.0112293	Down	ADAMTS8	-	GO:0005578//proteinaceous extracellular matrix	GO:0004222//metalloendopeptidase activity;GO:0005178//integrin binding;GO:0008201//heparin binding;GO:0008270//zinc ion binding;GO:0009673//low-affinity phosphate transmembrane transporter activity	GO:0006508//proteolysis;GO:0008285//negative regulation of cell proliferation;GO:0035435//phosphate ion transmembrane transport	gi|311264363|ref|XP_003130131.1|/0/PREDICTED: LOW QUALITY PROTEIN: A disintegrin and metalloproteinase with thrombospondin motifs 8 [Sus scrofa]//gi|311264363|ref|XP_003130131.1|/0/PREDICTED: LOW QUALITY PROTEIN: A disintegrin and metalloproteinase with thrombospondin motifs 8 [Sus scrofa]
ENSSSCG00000006359	3728	13083.6	2771.58	-1.41617	4.25e-05	0.00824994	Down	ADAMTS4	-	GO:0005578//proteinaceous extracellular matrix;GO:0005615//extracellular space	GO:0002020//protease binding;GO:0004222//metalloendopeptidase activity;GO:0008270//zinc ion binding	GO:0006508//proteolysis	gi|350583227|ref|XP_003481462.1|/0/PREDICTED: LOW QUALITY PROTEIN: A disintegrin and metalloproteinase with thrombospondin motifs 4 [Sus scrofa]
ENSSSCG00000038627	5648	1703.56	8004.71	1.60019	2.87e-06	0.00099265	Up	ADAMTS18	-	-	-	-	gi|594669404|ref|XP_007182700.1|/0/PREDICTED: A disintegrin and metalloproteinase with thrombospondin motifs 18 [Balaenoptera acutorostrata scammoni]
ENSSSCG00000021241	5069	449.296	108.025	-1.28852	0.000277587	0.0316204	Down	ADAMTS13	-	GO:0005578//proteinaceous extracellular matrix;GO:0005615//extracellular space	GO:0004222//metalloendopeptidase activity;GO:0008270//zinc ion binding	GO:0006508//proteolysis;GO:0043171//peptide catabolic process	gi|927099867|ref|XP_013842548.1|/0/PREDICTED: A disintegrin and metalloproteinase with thrombospondin motifs 13 isoform X5 [Sus scrofa]
ENSSSCG00000016131	6345	461.048	127.294	-1.37959	3.36e-06	0.00113433	Down	ADAM23	ko04151//PI3K-Akt signaling pathway;ko04015//Rap1 signaling pathway;ko04810//Regulation of actin cytoskeleton;ko05205//Proteoglycans in cancer;ko04145//Phagosome;ko04510//Focal adhesion;ko05414//Dilated cardiomyopathy;ko04611//Platelet activation;ko05206//MicroRNAs in cancer;ko05410//Hypertrophic cardiomyopathy (HCM);ko05412//Arrhythmogenic right ventricular cardiomyopathy (ARVC);ko04512//ECM-rec…	GO:0016021//integral component of membrane	GO:0004222//metalloendopeptidase activity;GO:0008270//zinc ion binding	GO:0006508//proteolysis	gi|465967231|ref|XP_004262853.1|/0/PREDICTED: disintegrin and metalloproteinase domain-containing protein 23 [Orcinus orca]
ENSSSCG00000026453	6079	490.917	1307.33	1.3824	1.27e-08	1.09e-05	Up	ACSM5	ko01100//Metabolic pathways;ko00650//Butanoate metabolism;ko00785//Lipoic acid metabolism	GO:0005759//mitochondrial matrix	GO:0005524//ATP binding;GO:0005525//GTP binding;GO:0046872//metal ion binding;GO:0047760//butyrate-CoA ligase activity	GO:0006631//fatty acid metabolic process	gi|350581671|ref|XP_003124611.3|/0/PREDICTED: acyl-coenzyme A synthetase ACSM5, mitochondrial isoform X1 [Sus scrofa]//gi|350581671|ref|XP_003124611.3|/0/PREDICTED: acyl-coenzyme A synthetase ACSM5, mitochondrial isoform X1 [Sus scrofa]
ENSSSCG00000038184	1768	31.6024	90.7152	1.2531	0.000174872	0.023565	Up	ACBD7	ko03320//PPAR signaling pathway	GO:0016021//integral component of membrane	GO:0000062//fatty-acyl-CoA binding;GO:0008289//lipid binding	-	gi|164518984|ref|NP_001106768.1|/1.10687e-54/acyl-CoA-binding domain-containing protein 7 [Bos taurus]
ENSSSCG00000007873	5190	131.975	3.92049	-2.6542	5.05e-13	1.02e-09	Down	ABCC6	ko02010//ABC transporters	GO:0005634//nucleus;GO:0005886//plasma membrane;GO:0016020//membrane;GO:0016021//integral component of membrane;GO:0044464	GO:0000166//nucleotide binding;GO:0005215//transporter activity;GO:0005524//ATP binding;GO:0016887//ATPase activity;GO:0042626//ATPase activity, coupled to transmembrane movement of substances	GO:0006810//transport;GO:0055085//transmembrane transport	gi|431910484|gb|ELK13556.1|/0/Multidrug resistance-associated protein 6 [Pteropus alecto]//gi|594051594|ref|XP_006050129.1|/0/PREDICTED: multidrug resistance-associated protein 6 isoform X2 [Bubalus bubalis]//gi|560979803|ref|XP_006212153.1|/0/PREDICTED: multidrug resistance-associated protein 6 [Vicugna pacos]
ENSSSCG00000000713	1275	170.702	48.2458	-1.23748	0.000141857	0.0207403	Down	-	ko04740//Olfactory transduction	-	-	-	gi|927132812|ref|XP_013843896.1|/8.33989e-157/PREDICTED: anoctamin-2 [Sus scrofa]
ENSSSCG00000001931	2916	299.996	716.324	1.17514	6.51e-05	0.0116105	Up	-	-	GO:0016021//integral component of membrane	-	-	gi|927159459|ref|XP_013833568.1|/0/PREDICTED: GRAM domain-containing protein 2 isoform X3 [Sus scrofa]
ENSSSCG00000002379	848	161.305	333.937	1.01999	6.05e-05	0.0110647	Up	-	ko00620//Pyruvate metabolism	-	-	-	gi|298104130|ref|NP_001177127.1|/1.59976e-100/acylphosphatase-1 isoform 1 [Sus scrofa]
ENSSSCG00000002857	3051	225.398	46.4777	-1.52806	7.02e-06	0.00207471	Down	-	-	-	GO:0003676//nucleic acid binding;GO:0004004//ATP-dependent RNA helicase activity;GO:0005524//ATP binding	GO:0007140//male meiosis;GO:0007283//spermatogenesis;GO:0009566//fertilization;GO:0010501//RNA secondary structure unwinding;GO:0031047//gene silencing by RNA;GO:0034587//piRNA metabolic process;GO:0043046//DNA methylation involved in gamete generation;GO:1903955//positive regulation of protein targeting to mitochondrion	gi|927138373|ref|XP_013844001.1|/0/PREDICTED: putative ATP-dependent RNA helicase TDRD12 isoform X1 [Sus scrofa]
ENSSSCG00000004572	1537	19.9904	102.683	1.44553	0.000104368	0.0168539	Up	-	ko04510//Focal adhesion;ko04014//Ras signaling pathway;ko05100//Bacterial invasion of epithelial cells;ko04910//Insulin signaling pathway;ko04650//Natural killer cell mediated cytotoxicity;ko04062//Chemokine signaling pathway;ko04072//Phospholipase D signaling pathway;ko05034//Alcoholism;ko04722//Neurotrophin signaling pathway;ko05220//Chronic myeloid leukemia;ko04915//Estrogen signaling pathway;…	GO:0005730//nucleolus;GO:0005886//plasma membrane;GO:0005925//focal adhesion	GO:0005509//calcium ion binding;GO:0005544//calcium-dependent phospholipid binding;GO:0019905//syntaxin binding;GO:0030276//clathrin binding	GO:0006906//vesicle fusion;GO:0017158//regulation of calcium ion-dependent exocytosis;GO:0048791//calcium ion-regulated exocytosis of neurotransmitter	gi|350578556|ref|XP_003480391.1|/1.36974e-81/PREDICTED: C2 calcium-dependent domain-containing protein 4A-like [Sus scrofa]
ENSSSCG00000006491	1757	3415.92	762.878	-1.43631	9.9e-06	0.00280685	Down	-	ko04932//Non-alcoholic fatty liver disease (NAFLD);ko04152//AMPK signaling pathway;ko04920//Adipocytokine signaling pathway	GO:0005886//plasma membrane;GO:0016021//integral component of membrane	GO:0003707//steroid hormone receptor activity;GO:0005496//steroid binding	GO:0043401//steroid hormone mediated signaling pathway	gi|343887395|ref|NP_001230597.1|/0/progestin and adipoQ receptor family member 6 [Sus scrofa]
ENSSSCG00000006793	3323	332.754	762.771	1.0869	0.000310991	0.0344568	Up	-	ko01100//Metabolic pathways;ko00520//Amino sugar and nucleotide sugar metabolism	-	-	-	gi|350583533|ref|XP_003355301.2|/0/PREDICTED: acidic mammalian chitinase-like [Sus scrofa]//gi|350583533|ref|XP_003355301.2|/0/PREDICTED: acidic mammalian chitinase-like [Sus scrofa]//gi|350583533|ref|XP_003355301.2|/1.01303e-161/PREDICTED: acidic mammalian chitinase-like [Sus scrofa]
ENSSSCG00000007899	9774	126.905	1167.91	1.81279	1.13e-06	0.000443491	Up	-	ko04975//Fat digestion and absorption;ko04977//Vitamin digestion and absorption	-	-	-	gi|767988043|ref|XP_006721060.2|/0/1
ENSSSCG00000008115	1349	178.538	56.6305	-1.14644	0.000251579	0.029609	Down	-	-	GO:0005783//endoplasmic reticulum;GO:0016021//integral component of membrane;GO:0045121//membrane raft	GO:0019911//structural constituent of myelin sheath	GO:1902043//positive regulation of extrinsic apoptotic signaling pathway via death domain receptors	gi|927109499|ref|XP_003124869.3|/2.2277e-96/PREDICTED: myelin and lymphocyte protein isoform X1 [Sus scrofa]
ENSSSCG00000008419	2873	276.396	99.1053	-1.06363	0.000260768	0.0303132	Down	-	ko04514//Cell adhesion molecules (CAMs);ko05414//Dilated cardiomyopathy;ko05410//Hypertrophic cardiomyopathy (HCM);ko05412//Arrhythmogenic right ventricular cardiomyopathy (ARVC);ko04512//ECM-receptor interaction;ko05416//Viral myocarditis	GO:0016021//integral component of membrane;GO:0030054//cell junction;GO:0042734//presynaptic membrane	GO:0046872//metal ion binding;GO:0097109//neuroligin family protein binding	GO:0007155//cell adhesion;GO:0007269//neurotransmitter secretion;GO:0051965//positive regulation of synapse assembly;GO:0090129//positive regulation of synapse maturation	gi|685581479|ref|XP_009182438.1|/0/1//gi|685581479|ref|XP_009182438.1|/0/1//gi|431912693|gb|ELK14711.1|/0/Neurexin-1-alpha [Pteropus alecto]
ENSSSCG00000009213	1830	38.4637	303.842	1.86103	4.59e-07	0.000224523	Up	-	ko04976//Bile secretion;ko02010//ABC transporters	GO:0005634//nucleus;GO:0005886//plasma membrane;GO:0016021//integral component of membrane;GO:0031966//mitochondrial membrane	GO:0005524//ATP binding;GO:0015238//drug transmembrane transporter activity;GO:0042626//ATPase activity, coupled to transmembrane movement of substances;GO:0042803//protein homodimerization activity	GO:0006855//drug transmembrane transport;GO:0046415//urate metabolic process	gi|47522846|ref|NP_999175.1|/0/ATP-binding cassette sub-family G member 2 [Sus scrofa]//gi|47522846|ref|NP_999175.1|/0/ATP-binding cassette sub-family G member 2 [Sus scrofa]//gi|47522846|ref|NP_999175.1|/1.36867e-80/ATP-binding cassette sub-family G member 2 [Sus scrofa]
ENSSSCG00000009631	1729	445.199	159.233	-1.14269	5.45e-06	0.00170253	Down	-	ko04062//Chemokine signaling pathway;ko04666//Fc gamma R-mediated phagocytosis	GO:0070062//extracellular exosome	-	-	gi|242253862|ref|NP_001156360.1|/1.75571e-154/phosphatidylethanolamine-binding protein 4 precursor [Sus scrofa]//gi|242253862|ref|NP_001156360.1|/4.61914e-127/phosphatidylethanolamine-binding protein 4 precursor [Sus scrofa]//gi|242253862|ref|NP_001156360.1|/1.75571e-154/phosphatidylethanolamine-binding protein 4 precursor [Sus scrofa]//gi|242253862|ref|NP_001156360.1|/6.41604e-121/phosphatidylet…
ENSSSCG00000010212	7208	600.728	201.612	-1.24966	7.15e-07	0.000307345	Down	-	ko05205//Proteoglycans in cancer	GO:0005737//cytoplasm;GO:0005764//lysosome;GO:0005923//bicellular tight junction;GO:0009925//basal plasma membrane;GO:0009986//cell surface;GO:0014704//intercalated disc;GO:0014731//spectrin-associated cytoskeleton;GO:0016328//lateral plasma membrane;GO:0016529//sarcoplasmic reticulum;GO:0030018//Z disc;GO:0030315//T-tubule;GO:0030425//dendrite;GO:0031594//neuromuscular junction;GO:0033268//node …	GO:0005200//structural constituent of cytoskeleton;GO:0008093//cytoskeletal adaptor activity;GO:0030507//spectrin binding;GO:0044325//ion channel binding;GO:0045296//cadherin binding	GO:0000281//mitotic cytokinesis;GO:0007165//signal transduction;GO:0007411//axon guidance;GO:0010628//positive regulation of gene expression;GO:0010650//positive regulation of cell communication by electrical coupling;GO:0010960//magnesium ion homeostasis;GO:0019228//neuronal action potential;GO:0034112//positive regulation of homotypic cell-cell adhesion;GO:0043001//Golgi to plasma membrane prot…	gi|927206328|ref|XP_013838727.1|/0/PREDICTED: ankyrin-3 isoform X3 [Sus scrofa]//gi|544458472|ref|XP_005565847.1|/0/1//gi|157785633|ref|NP_001099090.1|/0/ankyrin-3 [Bos taurus]//gi|640802017|ref|XP_008057319.1|/0/1//gi|767962652|ref|XP_011538015.1|/0/1//gi|731197076|ref|XP_010601252.1|/0/1//gi|927206328|ref|XP_013838727.1|/0/PREDICTED: ankyrin-3 isoform X3 [Sus scrofa]//gi|927206328|ref|XP_013838…
ENSSSCG00000010370	2037	418.511	146.587	-1.05309	0.000453279	0.0450297	Down	-	-	-	GO:0005509//calcium ion binding;GO:0005544//calcium-dependent phospholipid binding	GO:0007596//blood coagulation	gi|343790945|ref|NP_001230528.1|/0/annexin A8 [Sus scrofa]
ENSSSCG00000016401	7862	272.358	85.2781	-1.2597	1.32e-05	0.00347526	Down	-	-	GO:0005871//kinesin complex	GO:0003777//microtubule motor activity;GO:0005524//ATP binding;GO:0008017//microtubule binding;GO:0016887//ATPase activity	GO:0007018//microtubule-based movement;GO:0030705//cytoskeleton-dependent intracellular transport	gi|90080906|dbj|BAE89934.1|/6.09454e-132/1
ENSSSCG00000020706	1827	464.114	167.353	-1.07631	0.000287045	0.0324372	Down	-	ko01100//Metabolic pathways;ko00590//Arachidonic acid metabolism;ko05204//Chemical carcinogenesis;ko00980//Metabolism of xenobiotics by cytochrome P450	GO:0005829//cytosol;GO:0070062//extracellular exosome	GO:0004090//carbonyl reductase (NADPH) activity;GO:0016655//oxidoreductase activity, acting on NAD(P)H, quinone or similar compound as acceptor;GO:0047021//15-hydroxyprostaglandin dehydrogenase (NADP+) activity;GO:0050221//prostaglandin-E2 9-reductase activity	GO:0017144//drug metabolic process;GO:0019371//cyclooxygenase pathway;GO:0030855//epithelial cell differentiation;GO:0042373//vitamin K metabolic process;GO:0055114//oxidation-reduction process	gi|47522960|ref|NP_999238.1|/1.9772e-149/carbonyl reductase [NADPH] 1 [Sus scrofa]//gi|47522960|ref|NP_999238.1|/0/carbonyl reductase [NADPH] 1 [Sus scrofa]//gi|937575550|ref|NP_001302675.1|/0/carbonyl reductase [NADPH] 1 [Sus scrofa]//gi|47522960|ref|NP_999238.1|/0/carbonyl reductase [NADPH] 1 [Sus scrofa]//gi|937575550|ref|NP_001302675.1|/2.0779e-166/carbonyl reductase [NADPH] 1 [Sus scrofa]//g…
ENSSSCG00000020872	827	343.134	1180.04	1.63827	3.85e-09	4.04e-06	Up	-	-	GO:0016020//membrane	-	-	gi|335309362|ref|XP_003361608.1|/9.09687e-63/PREDICTED: PDZK1-interacting protein 1 [Sus scrofa]
ENSSSCG00000024045	6594	959.324	2078.72	1.17377	1.05e-08	9.33e-06	Up	-	-	GO:0005829//cytosol;GO:0061700//GATOR2 complex	GO:0034618//arginine binding;GO:0042802//identical protein binding	GO:1904262//negative regulation of TORC1 signaling	gi|222831645|ref|NP_001138536.1|/0/1//gi|795080560|ref|XP_011854892.1|/0/1//gi|222831645|ref|NP_001138536.1|/0/1
ENSSSCG00000027515	11113	105.718	253.713	1.17799	3.7e-05	0.00749505	Up	-	-	-	-	-	gi|594663750|ref|XP_007180031.1|/0/PREDICTED: IgGFc-binding protein isoform X2 [Balaenoptera acutorostrata scammoni]//gi|927139912|ref|XP_013844022.1|/0/PREDICTED: LOW QUALITY PROTEIN: IgGFc-binding protein [Sus scrofa]//gi|594663750|ref|XP_007180031.1|/0/PREDICTED: IgGFc-binding protein isoform X2 [Balaenoptera acutorostrata scammoni]
ENSSSCG00000028794	5527	13071.5	5354.24	-1.00916	8.25e-06	0.00238805	Down	-	ko01100//Metabolic pathways;ko00280//Valine, leucine and isoleucine degradation;ko00640//Propanoate metabolism	GO:0005759//mitochondrial matrix	GO:0003863//3-methyl-2-oxobutanoate dehydrogenase (2-methylpropanoyl-transferring) activity;GO:0046872//metal ion binding	GO:0055114//oxidation-reduction process	gi|178056466|ref|NP_001116555.1|/0/2-oxoisovalerate dehydrogenase subunit alpha, mitochondrial [Sus scrofa]//gi|355703576|gb|EHH30067.1|/0/1//gi|178056466|ref|NP_001116555.1|/0/2-oxoisovalerate dehydrogenase subunit alpha, mitochondrial [Sus scrofa]//gi|178056466|ref|NP_001116555.1|/0/2-oxoisovalerate dehydrogenase subunit alpha, mitochondrial [Sus scrofa]//gi|178056466|ref|NP_001116555.1|/0/2-ox…
ENSSSCG00000031813	6685	404.341	119.888	-1.35611	5.16e-07	0.000244089	Down	-	-	-	-	-	gi|432094689|gb|ELK26169.1|/0/XK-related protein 4 [Myotis davidii]
ENSSSCG00000031955	7179	42.9709	7.15193	-1.46343	6.38e-05	0.0114903	Down	-	-	GO:0005886//plasma membrane;GO:0016021//integral component of membrane	GO:0005509//calcium ion binding	GO:0007156//homophilic cell adhesion via plasma membrane adhesion molecules	gi|560993955|ref|XP_006219091.1|/0/PREDICTED: protocadherin-20 [Vicugna pacos]
ENSSSCG00000033750	3447	69.5952	199.829	1.32731	7.14e-06	0.0020882	Up	-	-	-	-	-	gi|466083872|ref|XP_004285129.1|/4.2956e-179/PREDICTED: SH2 domain-containing protein 4A [Orcinus orca]//gi|955540070|ref|XP_014651413.1|/0/PREDICTED: SH2 domain-containing protein 4A [Ceratotherium simum simum]//gi|817327446|ref|XP_012290680.1|/5.64896e-171/1
ENSSSCG00000034371	685	3211.34	746.006	-1.48774	1.56e-06	0.000583709	Down	-	-	GO:0005615//extracellular space	GO:0008009//chemokine activity;GO:0030414//peptidase inhibitor activity;GO:0048020//CCR chemokine receptor binding	GO:0002548//monocyte chemotaxis;GO:0007186//G-protein coupled receptor signaling pathway;GO:0010466//negative regulation of peptidase activity;GO:0030593//neutrophil chemotaxis;GO:0043547//positive regulation of GTPase activity;GO:0048247//lymphocyte chemotaxis;GO:0050729//positive regulation of inflammatory response;GO:0070098//chemokine-mediated signaling pathway;GO:0070374//positive regulation…	gi|958769880|ref|XP_014717736.1|/1.04269e-17/PREDICTED: WAP four-disulfide core domain protein 2-like [Equus asinus]
ENSSSCG00000034551	1990	22.4369	89.4588	1.56143	4.49e-06	0.00146401	Up	-	-	GO:0005634//nucleus;GO:0005667//transcription factor complex	GO:0043425//bHLH transcription factor binding;GO:0043565//sequence-specific DNA binding;GO:0046982//protein heterodimerization activity;GO:0070888//E-box binding	GO:0001707//mesoderm formation;GO:0001894//tissue homeostasis;GO:0001958//endochondral ossification;GO:0002062//chondrocyte differentiation;GO:0003188//heart valve formation;GO:0008284//positive regulation of cell proliferation;GO:0030199//collagen fibril organization;GO:0030509//BMP signaling pathway;GO:0032967//positive regulation of collagen biosynthetic process;GO:0035990//tendon cell differe…	gi|675735234|ref|XP_008981260.1|/4.96456e-90/1
ENSSSCG00000035531	2204	11.4741	98.7861	1.3013	0.000466115	0.045747	Up	-	-	GO:0005887//integral component of plasma membrane	GO:0004888//transmembrane signaling receptor activity	GO:0002223//stimulatory C-type lectin receptor signaling pathway;GO:0007155//cell adhesion	gi|586562957|ref|XP_006914732.1|/5.49824e-98/PREDICTED: C-type lectin domain family 4 member A isoform X3 [Pteropus alecto]
ENSSSCG00000036305	1045	115.29	318.656	1.16548	0.000373986	0.0393908	Up	-	-	GO:0016021//integral component of membrane;GO:0070062//extracellular exosome	-	-	gi|311276569|ref|XP_003135261.1|/6.48828e-52/PREDICTED: small integral membrane protein 1-like [Sus scrofa]
ENSSSCG00000036465	8421	42.9886	310.519	1.66789	6.55e-06	0.00197617	Up	-	ko04919//Thyroid hormone signaling pathway;ko04152//AMPK signaling pathway;ko04931//Insulin resistance	-	-	-	gi|706109011|ref|XP_010207942.1|/3.09741e-142/1//gi|700327511|ref|XP_009910641.1|/1.06747e-98/1//gi|524998385|ref|XP_005046952.1|/5.79061e-140/1//gi|697038284|ref|XP_009581605.1|/9.57019e-137/1
ENSSSCG00000036983	1970	72.7629	670.682	1.63996	1.26e-05	0.00342959	Up	-	ko04151//PI3K-Akt signaling pathway;ko04145//Phagosome;ko05169//Epstein-Barr virus infection;ko05414//Dilated cardiomyopathy;ko05152//Tuberculosis;ko05202//Transcriptional misregulation in cancer;ko05140//Leishmaniasis;ko04020//Calcium signaling pathway;ko04640//Hematopoietic cell lineage;ko05416//Viral myocarditis;ko05146//Amoebiasis;ko05162//Measles;ko04650//Natural killer cell mediated cytotox…	-	-	-	gi|2136513|pir||I47159/0/Ig gamma 2a chain constant region - pig (fragment)//gi|2136513|pir||I47159/0/Ig gamma 2a chain constant region - pig (fragment)
ENSSSCG00000037775	6947	1493.13	4922.71	1.23426	0.000447874	0.0447708	Up	-	ko04151//PI3K-Akt signaling pathway;ko04145//Phagosome;ko05169//Epstein-Barr virus infection;ko05414//Dilated cardiomyopathy;ko05152//Tuberculosis;ko05202//Transcriptional misregulation in cancer;ko05140//Leishmaniasis;ko04020//Calcium signaling pathway;ko04640//Hematopoietic cell lineage;ko05416//Viral myocarditis;ko05146//Amoebiasis;ko05162//Measles;ko04650//Natural killer cell mediated cytotox…	GO:0009897//external side of plasma membrane;GO:0070062//extracellular exosome;GO:0071756//pentameric IgM immunoglobulin complex;GO:0071757//hexameric IgM immunoglobulin complex;GO:0072562//blood microparticle	GO:0003697//single-stranded DNA binding;GO:0003823//antigen binding;GO:0031210//phosphatidylcholine binding;GO:0034987//immunoglobulin receptor binding;GO:0042834//peptidoglycan binding	GO:0006910//phagocytosis, recognition;GO:0006911//phagocytosis, engulfment;GO:0006958//complement activation, classical pathway;GO:0019731//antibacterial humoral response;GO:0045087//innate immune response;GO:0050829//defense response to Gram-negative bacterium;GO:0050853//B cell receptor signaling pathway;GO:0050871//positive regulation of B cell activation	gi|411147281|dbj|BAM66301.1|/0/IgM heavy chain constant region, partial [Sus scrofa]//gi|411147281|dbj|BAM66301.1|/0/IgM heavy chain constant region, partial [Sus scrofa]//gi|411147281|dbj|BAM66301.1|/0/IgM heavy chain constant region, partial [Sus scrofa]//gi|411147281|dbj|BAM66301.1|/0/IgM heavy chain constant region, partial [Sus scrofa]//gi|411147281|dbj|BAM66301.1|/0/IgM heavy chain constant…
ENSSSCG00000038622	1179	44.5157	2.59465	-1.57611	2.64e-05	0.00593901	Down	-	ko00534//Glycosaminoglycan biosynthesis - heparan sulfate / heparin	GO:0000139//Golgi membrane;GO:0016021//integral component of membrane	GO:0008467//[heparan sulfate]-glucosamine 3-sulfotransferase 1 activity;GO:0033872//[heparan sulfate]-glucosamine 3-sulfotransferase 3 activity	GO:0006024//glycosaminoglycan biosynthetic process	gi|300796296|ref|NP_001179477.1|/0/heparan sulfate glucosamine 3-O-sulfotransferase 3A1 [Bos taurus]
ENSSSCG00000039972	15725	3823.76	1543.9	-1.04248	1.01e-05	0.0028478	Down	-	-	GO:0016021//integral component of membrane	-	GO:0010038//response to metal ion	gi|927099083|ref|XP_013849263.1|/4.80803e-66/PREDICTED: protein CutA homolog isoform X2 [Sus scrofa]//gi|545804243|ref|XP_005660447.1|/1.2534e-121/PREDICTED: protein CutA homolog isoform X1 [Sus scrofa]
ENSSSCG00000040830	5382	615.576	74.0118	-2.37907	6.95e-17	2.46e-13	Down	-	-	GO:0005737//cytoplasm;GO:0016020//membrane	GO:0005488	GO:0006810//transport;GO:0008104//protein localization;GO:0044237//cellular metabolic process;GO:0044763;GO:0050794//regulation of cellular process	gi|987936621|ref|XP_015416385.1|/1.01845e-10/PREDICTED: ADP-ribosylation factor 4-like [Myotis davidii]
MSTRG.11277	8617	1190.57	66.5878	-2.14554	8.72e-09	8.24e-06	Down	-	-	-	-	-	-
MSTRG.12286	348	303.605	48.5937	-1.53623	2.15e-05	0.00500189	Down	-	-	-	-	-	-
MSTRG.14236	3259	110.329	379.828	1.42914	9.85e-06	0.00280685	Up	-	-	-	-	-	-
MSTRG.15066	3651	36.7918	138.931	1.3001	0.000373948	0.0393908	Up	-	-	-	-	-	-
MSTRG.19718	6378	283.236	719.675	1.23749	1.31e-05	0.00347526	Up	-	-	-	-	-	-
MSTRG.19912	6104	551.332	58.3423	-1.77686	1.66e-06	0.000610212	Down	-	-	-	-	-	-
MSTRG.19913	3332	256.201	16.3444	-1.87987	5.69e-07	0.000260477	Down	-	-	-	-	-	-
MSTRG.19941	9199	862.092	89.7791	-1.8372	6.79e-07	0.000296084	Down	-	-	-	-	-	-
MSTRG.19942	20966	2407.81	342.777	-1.57887	2.01e-05	0.00483344	Down	-	-	-	-	-	-
MSTRG.20021	1090	148.698	15.5897	-1.40025	0.000194794	0.0245562	Down	-	-	-	-	-	-
MSTRG.20308	2151	711.288	1540.49	1.08302	0.000225508	0.027103	Up	-	-	-	-	-	-
MSTRG.4870	1240	91.0557	2.63738	-1.39429	0.000116428	0.0180167	Down	-	-	-	-	-	-
MSTRG.5621	3374	1730.22	443	-1.55061	5.14e-09	5.21e-06	Down	-	-	-	-	-	-
MSTRG.7713	16321	3899.24	1195.56	-1.16867	0.000333716	0.0365465	Down	-	-	-	-	-	-
MSTRG.9568	774	27.8926	86.5645	1.31737	8.64e-05	0.0145858	Up	-	-	-	-	-	-
NONSUSG010039.1	47439	9420.41	1106.92	-1.9046	1.23e-07	7.4e-05	Down	-	-	-	-	-	-
NONSUSG016352.1	1908	47.4765	133.036	1.23364	0.000126186	0.0190379	Up	-	-	-	-	-	-

## Sheet: Table S8
Table S8.LncRNA differentially expressed in abdominal adipose tissue
GeneID	Length	ALF-Expression	BLF-Expression	log2FoldChange(BLF/ALF)	Pvalue	Padj	Up/Down-Regulation(BLF/ALF)	Description	Pathway	GO Component	GO Function	GO Process	Blast nr
MSTRG.1102	629	274028	1.26936e+06	1.55499	1.30859e-05	0.00347526	Up	-	-	-	-	-	-
MSTRG.11513	9274	427.424	927.373	1.06957	6.4006e-05	0.0114903	Up	-	-	-	-	-	-
MSTRG.12697	701	69.6579	3.78758	-1.63541	1.32325e-05	0.00347526	Down	-	-	-	-	-	-
MSTRG.12775	1878	177.769	29.7048	-1.35696	0.000275602	0.0316204	Down	-	-	-	-	-	-
MSTRG.12779	2639	5.47821	48.7916	1.35116	0.00030584	0.0340408	Up	-	-	-	-	-	-
MSTRG.13438	462	24.8673	0.964686	-1.29465	0.000371833	0.0393908	Down	-	-	-	-	-	-
MSTRG.14610	2253	152.75	22.2587	-1.83321	5.91747e-08	4.09373e-05	Down	-	-	-	-	-	-
MSTRG.15066	3651	36.7918	138.931	1.3001	0.000373948	0.0393908	Up	-	-	-	-	-	-
MSTRG.15642	2088	85.5233	9.66593	-1.40334	0.000189986	0.0242463	Down	-	-	-	-	-	-
MSTRG.19818	3144	427.928	131.504	-1.14287	0.000399859	0.0413927	Down	-	-	-	-	-	-
MSTRG.19914	1921	173.872	24.7637	-1.36135	0.000290123	0.032655	Down	-	-	-	-	-	-
MSTRG.19943	271	109.766	0	-3.44828	6.63721e-21	3.76516e-17	Down	-	-	-	-	-	-
MSTRG.20051	264	26.8987	1.60624	-1.3702	0.000220124	0.0265685	Down	-	-	-	-	-	-
MSTRG.20065	1265	98.3221	10.0721	-1.44995	0.000114273	0.0179101	Down	-	-	-	-	-	-
MSTRG.20148	421	30.1145	1.60624	-1.40427	0.000150325	0.0215345	Down	-	-	-	-	-	-
MSTRG.20451	377	25.7557	104.408	1.44961	2.94504e-05	0.00647544	Up	-	-	-	-	-	-
MSTRG.20732	2870	138.235	13.2347	-2.31163	4.10384e-12	6.84714e-09	Down	-	-	-	-	-	-
MSTRG.2406	530	52.6363	133.674	1.20607	4.21718e-05	0.00824939	Up	-	-	-	-	-	-
MSTRG.2843	3702	397.151	125.409	-1.23608	1.45151e-05	0.00370907	Down	-	-	-	-	-	-
MSTRG.2925	4479	97.4446	481.467	1.44218	8.86758e-05	0.0147088	Up	-	-	-	-	-	-
MSTRG.3164	571	102.691	232.904	1.15153	3.25737e-05	0.00684386	Up	-	-	-	-	-	-
MSTRG.32	10381	433.342	64.1182	-1.68187	1.56402e-06	0.000583709	Down	-	-	-	-	-	-
MSTRG.5109	492	45.7242	4.31718	-1.3138	0.00043577	0.0441435	Down	-	-	-	-	-	-
MSTRG.5622	1790	244.574	89.6914	-1.03302	0.000269058	0.0311492	Down	-	-	-	-	-	-
MSTRG.7474	2298	348.993	51.6417	-1.87033	1.4718e-08	1.19275e-05	Down	-	-	-	-	-	-
MSTRG.7646	727	827.732	97.7185	-2.44921	5.29071e-18	2.1438e-14	Down	-	-	-	-	-	-
MSTRG.8296	5305	233.169	644.248	1.29431	1.80486e-05	0.00442186	Up	-	-	-	-	-	-
MSTRG.9020	2136	54.8615	6.11131	-1.4149	0.000168065	0.0229182	Down	-	-	-	-	-	-
NONSUSG000001.1	3409	1111.58	2343.72	1.05078	0.000180823	0.0236353	Up	-	-	-	-	-	-
NONSUSG000360.1	2716	37.5292	0.990792	-1.83404	9.98194e-07	0.000398771	Down	-	-	-	-	-	-
NONSUSG001288.1	4045	3.10955	32.3596	1.63473	1.37536e-05	0.00354644	Up	-	-	-	-	-	-
NONSUSG003945.1	3525	405.923	144.566	-1.09174	0.000367542	0.0393395	Down	-	-	-	-	-	-
NONSUSG004874.1	5374	21.6445	62.2146	1.21174	0.000378986	0.0396662	Up	-	-	-	-	-	-
NONSUSG004879.1	4857	195.61	0	-2.52923	1.68381e-11	2.51367e-08	Down	-	-	-	-	-	-
NONSUSG004955.1	919	78.5848	14.5938	-1.60359	2.35282e-06	0.000834193	Down	-	-	-	-	-	-
NONSUSG006869.1	5383	13.9993	163.133	2.08828	1.37057e-08	1.14337e-05	Up	-	-	-	-	-	-
NONSUSG006949.1	2096	334.642	92.4503	-1.25861	0.000178495	0.0236353	Down	-	-	-	-	-	-
NONSUSG007890.1	2179	39.71	156.903	1.67587	3.68915e-08	2.75366e-05	Up	-	-	-	-	-	-
NONSUSG009183.1	1433	43.8788	6.50567	-1.36038	0.000283654	0.0321823	Down	-	-	-	-	-	-
NONSUSG010039.1	47439	9420.41	1106.92	-1.9046	1.22744e-07	7.40254e-05	Down	-	-	-	-	-	-
NONSUSG010573.1	10396	0.999105	21.0967	1.37751	0.000178321	0.0236353	Up	-	-	-	-	-	-
NONSUSG010653.1	745	302.906	45.0285	-1.97015	1.57784e-09	1.7213e-06	Down	-	-	-	-	-	-
NONSUSG012255.1	7772	779.694	1874.58	1.27582	9.37381e-09	8.57673e-06	Up	-	-	-	-	-	-
NONSUSG012413.1	1640	31.467	152.105	1.81251	2.61375e-08	2.00369e-05	Up	-	-	-	-	-	-
NONSUSG014231.1	2505	186.367	61.1239	-1.15023	0.000155207	0.0220114	Down	-	-	-	-	-	-
NONSUSG015834.1	2816	27.2192	1.35904	-1.27506	0.000456876	0.0451528	Down	-	-	-	-	-	-
NONSUSG016168.1	8978	765.009	270.514	-1.07248	0.000359441	0.0387706	Down	-	-	-	-	-	-
NONSUSG016352.1	1908	47.4765	133.036	1.23364	0.000126186	0.0190379	Up	-	-	-	-	-	-
NONSUSG016476.1	5529	6.34315	230.319	1.73174	3.04638e-06	0.00104105	Up	-	-	-	-	-	-
NONSUSG018491.1	1351	0.370446	47.9362	1.96792	1.34215e-07	7.76915e-05	Up	-	-	-	-	-	-

## Sheet: Table S9
Table S9.MiRNA differentially expressed in abdominal adipose tissue
miR_name	A1_LF,A4_LF,A7_LF-Readnum	B1_LF,B4_LF,B7_LF-Readnum	A1_LF,A4_LF,A7_LF-ReadsMean	B1_LF,B4_LF,B7_LF-ReadsMean	log2Ratio(B1_LF,B4_LF,B7_LF/A1_LF,A4_LF,A7_LF) normalized	p-value	q-value(Storey et al. 2003)
ssc-miR-206	1950	14951	650	4983.67	3.09207	0	0
ssc-miR-23a	34737	63000	11579	21000	1.01225	0	0
ssc-miR-145-5p	10407	22163	3469	7387.67	1.24398	0	0
ssc-miR-146b	8411	15326	2803.67	5108.67	1.01901	0	0
ssc-miR-184	2441	6946	813.667	2315.33	1.66209	0	0
ssc-miR-9	13381	5887	4460.33	1962.33	-1.03121	0	0
ssc-miR-9-1	13378	5886	4459.33	1962	-1.03113	0	0
ssc-miR-9-2	13378	5886	4459.33	1962	-1.03113	0	0
ssc-miR-452	1281	247	427	82.3333	-2.22131	3.16e-147	4.25e-147
ssc-miR-205	111	627	37	209	2.65128	5.06e-99	5.82e-99
ssc-miR-183	1040	264	346.667	88	-1.8246	2.9e-93	3e-93
ssc-miR-365-3p	1148	2073	382.667	691	1.00597	1.15e-83	1.13e-83
ssc-miR-224	696	276	232	92	-1.18104	7.57e-34	5.5e-34
ssc-miR-338	257	62	85.6667	20.6667	-1.89805	1.33e-25	9e-26
ssc-miR-217	48	169	16	56.3333	1.96929	4.88e-20	3.22e-20
ssc-miR-7135-5p	48	0	16	0	-6.43159	2.91e-12	1.59e-12
ssc-miR-885-5p	56	142	18.6667	47.3333	1.49577	4.27e-12	2.31e-12
ssc-miR-133a-5p	58	126	19.3333	42	1.27268	7.86e-09	3.94e-09
ssc-miR-219a	69	138	23	46	1.15338	2.29e-08	1.14e-08
ssc-miR-31	99	32	33	10.6667	-1.47598	5.6e-08	2.71e-08
ssc-miR-216	20	61	6.66667	20.3333	1.76219	3.25e-07	1.56e-07
ssc-miR-34c	89	38	29.6667	12.6667	-1.07443	5.85e-05	2.54e-05
ssc-miR-219b-3p	2	18	0.666667	6	3.3233	6.53e-05	2.82e-05
ssc-miR-1839-3p	0	12	0	4	4.73834	0.000275494	0.000116139
ssc-miR-1271	35	15	11.6667	5	-1.06902	0.0120795	0.00445908
ssc-miR-376a-3p	3	9	1	3	1.73834	0.0519515	0.0177095
ssc-miR-129a-3p	11	20	3.66667	6.66667	1.01587	0.0549915	0.0185681
ssc-miR-652	4	10	1.33333	3.33333	1.4753	0.0687958	0.0226914
ssc-miR-487b	15	6	5	2	-1.16855	0.0775084	0.0254473
ssc-miR-9851-3p	5	1	1.66667	0.333333	-2.16855	0.111726	0.0349117
ssc-miR-935	12	5	4	1.66667	-1.10966	0.129833	0.0402171
ssc-miR-9810-3p	3	7	1	2.33333	1.37577	0.148599	0.0450506
novel_mir_326	9254	0	3084.67	0	-14.2051	0	0
novel_mir_618	0	5032	0	1677.33	13.2676	0	0
novel_mir_49	86	1867	28.6667	622.333	4.41096	0	0
novel_mir_86	3419	0	1139.67	0	-12.7686	0	0
novel_mir_300	0	1595	0	531.667	11.6101	6.91e-201	1.03e-199
novel_mir_82	51	927	17	309	4.15472	4.04e-198	5.39e-197
novel_mir_528	0	1090	0	363.333	11.0608	3.07e-151	3.41e-150
novel_mir_214	881	0	293.667	0	-10.8123	3.28e-130	2.74e-129
novel_mir_394	0	653	0	217.667	10.3217	1.39e-102	1.03e-101
novel_mir_102	0	501	0	167	9.93939	1.11e-83	7.78e-83
novel_mir_313	0	463	0	154.333	9.82559	9.95e-79	6.64e-78
novel_mir_370	14	320	4.66667	106.667	4.4853	2.5e-72	1.52e-71
novel_mir_473	301	0	100.333	0	-9.2629	6.13e-57	3.56e-56
novel_mir_236	353	67	117.667	22.3333	-2.42671	3.04e-49	1.69e-48
novel_mir_235	214	0	71.3333	0	-8.77074	1.77e-43	9.45e-43
novel_mir_308	44	272	14.6667	90.6667	2.59875	1.7e-40	8.73e-40
novel_mir_21	176	0	58.6667	0	-8.48871	3.39e-37	1.68e-36
novel_mir_3	32	205	10.6667	68.3333	2.6502	1.42e-31	6.79e-31
novel_mir_103	304	671	101.333	223.667	1.11296	4.4e-31	2.02e-30
novel_mir_158	745	378	248.333	126	-1.00813	5.01e-30	2.23e-29
novel_mir_402	0	130	0	43.3333	7.99309	9.57e-29	4.12e-28
novel_mir_219	114	0	38	0	-7.86217	3.37e-26	1.41e-25
novel_mir_175	110	0	36.6667	0	-7.81064	1.9e-25	7.66e-25
novel_mir_173	100	0	33.3333	0	-7.67313	1.51e-23	5.93e-23
novel_mir_163	0	97	0	32.3333	7.57064	1.21e-22	4.63e-22
novel_mir_119	91	0	30.3333	0	-7.53707	8.42e-22	3.12e-21
novel_mir_183	120	315	40	105	1.36304	1.21e-20	4.25e-20
novel_mir_448	64	218	21.3333	72.6667	1.73891	1.98e-20	6.78e-20
novel_mir_340	28	141	9.33333	47	2.30292	3.64e-19	1.21e-18
novel_mir_227	75	0	25	0	-7.2581	1.33e-18	4.22e-18
novel_mir_432	13	91	4.33333	30.3333	2.77808	1.4e-15	4.33e-15
novel_mir_169	59	0	19.6667	0	-6.91192	2.89e-15	8.77e-15
novel_mir_499	0	58	0	19.3333	6.8287	8.03e-15	2.33e-14
novel_mir_311	0	55	0	18.3333	6.75208	3.49e-14	9.71e-14
novel_mir_79	189	75	63	25	-1.3627	3.14e-13	8.22e-13
novel_mir_65	48	0	16	0	-6.61424	7.2e-13	1.85e-12
novel_mir_277	7	64	2.33333	21.3333	3.16337	9.8e-13	2.47e-12
novel_mir_578	0	44	0	14.6667	6.43016	8.75e-12	2.08e-11
novel_mir_282	0	43	0	14.3333	6.39699	1.46e-11	3.31e-11
novel_mir_529	0	43	0	14.3333	6.39699	1.46e-11	3.31e-11
novel_mir_148	82	18	27.3333	6	-2.2169	1.64e-11	3.64e-11
novel_mir_327	62	9	20.6667	3	-2.81355	2.05e-11	4.48e-11
novel_mir_200	41	0	13.6667	0	-6.38683	2.72e-11	5.85e-11
novel_mir_256	39	0	13	0	-6.31468	7.82e-11	1.66e-10
novel_mir_13	46	132	15.3333	44	1.49156	1.09e-10	2.28e-10
novel_mir_57	8	58	2.66667	19.3333	2.8287	1.24e-10	2.54e-10
novel_mir_296	0	36	0	12	6.14065	5.67e-10	1.11e-09
novel_mir_597	0	36	0	12	6.14065	5.67e-10	1.11e-09
novel_mir_423	0	34	0	11.3333	6.05819	1.65e-09	3.18e-09
novel_mir_53	0	32	0	10.6667	5.97072	4.83e-09	9.2e-09
novel_mir_58	31	0	10.3333	0	-5.98347	5.92e-09	1.11e-08
novel_mir_6	62	14	20.6667	4.66667	-2.17612	7.06e-09	1.31e-08
novel_mir_38	11	56	3.66667	18.6667	2.31865	1.5e-08	2.7e-08
novel_mir_383	29	0	9.66667	0	-5.88726	1.79e-08	3.19e-08
novel_mir_121	49	123	16.3333	41	1.29853	2.05e-08	3.59e-08
novel_mir_543	0	29	0	9.66667	5.8287	2.48e-08	4.29e-08
novel_mir_433	28	0	9.33333	0	-5.83663	3.14e-08	5.36e-08
novel_mir_537	0	27	0	9	5.72561	7.48e-08	1.25e-07
novel_mir_264	26	0	8.66667	0	-5.72972	9.68e-08	1.58e-07
novel_mir_195	11	52	3.66667	17.3333	2.21173	1.15e-07	1.85e-07
novel_mir_501	0	25	0	8.33333	5.61458	2.29e-07	3.63e-07
novel_mir_249	24	0	8	0	-5.61424	3.03e-07	4.7e-07
novel_mir_261	24	0	8	0	-5.61424	3.03e-07	4.7e-07
novel_mir_607	0	23	0	7.66667	5.49429	7.08e-07	1.07e-06
novel_mir_614	0	23	0	7.66667	5.49429	7.08e-07	1.07e-06
novel_mir_198	22	0	7.33333	0	-5.48871	9.61e-07	1.43e-06
novel_mir_212	22	0	7.33333	0	-5.48871	9.61e-07	1.43e-06
novel_mir_66	0	22	0	7.33333	5.43016	1.25e-06	1.84e-06
novel_mir_555	0	21	0	7	5.36304	2.22e-06	3.16e-06
novel_mir_247	30	79	10	26.3333	1.36761	2.91e-06	4.09e-06
novel_mir_137	20	0	6.66667	0	-5.3512	3.1e-06	4.18e-06
novel_mir_164	20	0	6.66667	0	-5.3512	3.1e-06	4.18e-06
novel_mir_186	20	0	6.66667	0	-5.3512	3.1e-06	4.18e-06
novel_mir_435	20	0	6.66667	0	-5.3512	3.1e-06	4.18e-06
novel_mir_556	0	20	0	6.66667	5.29265	3.97e-06	5.24e-06
novel_mir_688	0	20	0	6.66667	5.29265	3.97e-06	5.24e-06
novel_mir_24	19	0	6.33333	0	-5.2772	5.6e-06	7.18e-06
novel_mir_447	19	0	6.33333	0	-5.2772	5.6e-06	7.18e-06
novel_mir_474	19	0	6.33333	0	-5.2772	5.6e-06	7.18e-06
novel_mir_360	53	112	17.6667	37.3333	1.05016	6.24e-06	7.93e-06
novel_mir_510	0	19	0	6.33333	5.21865	7.1e-06	8.94e-06
novel_mir_93	18	0	6	0	-5.1992	1.02e-05	1.25e-05
novel_mir_382	18	0	6	0	-5.1992	1.02e-05	1.25e-05
novel_mir_527	0	18	0	6	5.14065	1.28e-05	1.56e-05
novel_mir_15	54	19	18	6.33333	-1.53624	2.03e-05	2.44e-05
novel_mir_544	0	17	0	5.66667	5.05819	2.3e-05	2.7e-05
novel_mir_672	0	17	0	5.66667	5.05819	2.3e-05	2.7e-05
novel_mir_697	0	17	0	5.66667	5.05819	2.3e-05	2.7e-05
novel_mir_51	93	46	31	15.3333	-1.04487	3.44e-05	4e-05
novel_mir_619	0	16	0	5.33333	4.97072	4.18e-05	4.81e-05
novel_mir_76	11	39	3.66667	13	1.79669	6.13e-05	6.93e-05
novel_mir_410	15	0	5	0	-4.93617	6.23e-05	6.93e-05
novel_mir_476	15	0	5	0	-4.93617	6.23e-05	6.93e-05
novel_mir_223	41	13	13.6667	4.33333	-1.68639	7.14e-05	7.81e-05
novel_mir_596	0	15	0	5	4.87761	7.61e-05	8.26e-05
novel_mir_323	15	45	5	15	1.55569	0.000101649	0.000108512
novel_mir_199	14	0	4.66667	0	-4.83663	0.000115247	0.000120144
novel_mir_243	14	0	4.66667	0	-4.83663	0.000115247	0.000120144
novel_mir_362	14	0	4.66667	0	-4.83663	0.000115247	0.000120144
novel_mir_89	27	6	9	2	-2.1992	0.000120246	0.000124384
novel_mir_678	0	14	0	4.66667	4.77808	0.000139338	0.000143024
novel_mir_75	9	33	3	11	1.84519	0.000173675	0.000176909
novel_mir_318	13	0	4.33333	0	-4.72972	0.000214274	0.000214981
novel_mir_355	13	0	4.33333	0	-4.72972	0.000214274	0.000214981
novel_mir_252	15	43	5	14.3333	1.4901	0.000232607	0.000231632
novel_mir_37	0	13	0	4.33333	4.67116	0.000256441	0.000244423
novel_mir_412	0	13	0	4.33333	4.67116	0.000256441	0.000244423
novel_mir_494	0	13	0	4.33333	4.67116	0.000256441	0.000244423
novel_mir_585	0	13	0	4.33333	4.67116	0.000256441	0.000244423
novel_mir_587	0	13	0	4.33333	4.67116	0.000256441	0.000244423
novel_mir_656	0	13	0	4.33333	4.67116	0.000256441	0.000244423
novel_mir_136	12	0	4	0	-4.61424	0.000400664	0.000366193
novel_mir_240	12	0	4	0	-4.61424	0.000400664	0.000366193
novel_mir_174	12	0	4	0	-4.61424	0.000400664	0.000366193
novel_mir_177	12	0	4	0	-4.61424	0.000400664	0.000366193
novel_mir_367	12	0	4	0	-4.61424	0.000400664	0.000366193
novel_mir_377	12	0	4	0	-4.61424	0.000400664	0.000366193
novel_mir_62	0	12	0	4	4.55569	0.000474544	0.000419355
novel_mir_524	0	12	0	4	4.55569	0.000474544	0.000419355
novel_mir_590	0	12	0	4	4.55569	0.000474544	0.000419355
novel_mir_602	0	12	0	4	4.55569	0.000474544	0.000419355
novel_mir_14	18	46	6	15.3333	1.32436	0.000497541	0.000436785
novel_mir_438	10	32	3.33333	10.6667	1.6488	0.000630728	0.000550089
novel_mir_70	11	0	3.66667	0	-4.48871	0.000753716	0.000640605
novel_mir_352	11	0	3.66667	0	-4.48871	0.000753716	0.000640605
novel_mir_366	11	0	3.66667	0	-4.48871	0.000753716	0.000640605
novel_mir_95	7	26	2.33333	8.66667	1.86381	0.000792552	0.000669349
novel_mir_167	0	11	0	3.66667	4.43016	0.000883219	0.000714277
novel_mir_287	0	11	0	3.66667	4.43016	0.000883219	0.000714277
novel_mir_426	0	11	0	3.66667	4.43016	0.000883219	0.000714277
novel_mir_532	0	11	0	3.66667	4.43016	0.000883219	0.000714277
novel_mir_600	0	11	0	3.66667	4.43016	0.000883219	0.000714277
novel_mir_698	0	11	0	3.66667	4.43016	0.000883219	0.000714277
novel_mir_707	0	11	0	3.66667	4.43016	0.000883219	0.000714277
novel_mir_206	10	0	3.33333	0	-4.3512	0.00142696	0.00109432
novel_mir_339	10	0	3.33333	0	-4.3512	0.00142696	0.00109432
novel_mir_341	10	0	3.33333	0	-4.3512	0.00142696	0.00109432
novel_mir_347	10	0	3.33333	0	-4.3512	0.00142696	0.00109432
novel_mir_364	10	0	3.33333	0	-4.3512	0.00142696	0.00109432
novel_mir_440	10	0	3.33333	0	-4.3512	0.00142696	0.00109432
novel_mir_475	10	0	3.33333	0	-4.3512	0.00142696	0.00109432
novel_mir_489	0	10	0	3.33333	4.29265	0.00165392	0.00121262
novel_mir_539	0	10	0	3.33333	4.29265	0.00165392	0.00121262
novel_mir_540	0	10	0	3.33333	4.29265	0.00165392	0.00121262
novel_mir_676	0	10	0	3.33333	4.29265	0.00165392	0.00121262
novel_mir_681	0	10	0	3.33333	4.29265	0.00165392	0.00121262
novel_mir_682	0	10	0	3.33333	4.29265	0.00165392	0.00121262
novel_mir_695	0	10	0	3.33333	4.29265	0.00165392	0.00121262
novel_mir_12	55	28	18.3333	9.33333	-1.00328	0.00206617	0.0015066
novel_mir_77	25	52	8.33333	17.3333	1.02731	0.00249861	0.00180222
novel_mir_208	19	43	6.33333	14.3333	1.14906	0.00260316	0.00182391
novel_mir_59	9	0	3	0	-4.1992	0.00272003	0.00182391
novel_mir_201	9	0	3	0	-4.1992	0.00272003	0.00182391
novel_mir_179	9	0	3	0	-4.1992	0.00272003	0.00182391
novel_mir_181	9	0	3	0	-4.1992	0.00272003	0.00182391
novel_mir_211	9	0	3	0	-4.1992	0.00272003	0.00182391
novel_mir_279	9	0	3	0	-4.1992	0.00272003	0.00182391
novel_mir_365	9	0	3	0	-4.1992	0.00272003	0.00182391
novel_mir_422	9	0	3	0	-4.1992	0.00272003	0.00182391
novel_mir_431	9	0	3	0	-4.1992	0.00272003	0.00182391
novel_mir_436	9	0	3	0	-4.1992	0.00272003	0.00182391
novel_mir_468	9	0	3	0	-4.1992	0.00272003	0.00182391
novel_mir_472	9	0	3	0	-4.1992	0.00272003	0.00182391
novel_mir_160	0	9	0	3	4.14065	0.00311733	0.0019438
novel_mir_107	0	9	0	3	4.14065	0.00311733	0.0019438
novel_mir_319	0	9	0	3	4.14065	0.00311733	0.0019438
novel_mir_519	0	9	0	3	4.14065	0.00311733	0.0019438
novel_mir_538	0	9	0	3	4.14065	0.00311733	0.0019438
novel_mir_608	0	9	0	3	4.14065	0.00311733	0.0019438
novel_mir_589	0	9	0	3	4.14065	0.00311733	0.0019438
novel_mir_601	0	9	0	3	4.14065	0.00311733	0.0019438
novel_mir_611	0	9	0	3	4.14065	0.00311733	0.0019438
novel_mir_613	0	9	0	3	4.14065	0.00311733	0.0019438
novel_mir_616	0	9	0	3	4.14065	0.00311733	0.0019438
novel_mir_669	0	9	0	3	4.14065	0.00311733	0.0019438
novel_mir_687	0	9	0	3	4.14065	0.00311733	0.0019438
novel_mir_693	0	9	0	3	4.14065	0.00311733	0.0019438
novel_mir_702	0	9	0	3	4.14065	0.00311733	0.0019438
novel_mir_60	22	7	7.33333	2.33333	-1.68135	0.00369488	0.00229321
novel_mir_386	20	6	6.66667	2	-1.76624	0.0041663	0.00257382
novel_mir_452	7	22	2.33333	7.33333	1.6228	0.00507869	0.0030975
novel_mir_269	8	0	2.66667	0	-4.02928	0.0052229	0.0030975
novel_mir_191	8	0	2.66667	0	-4.02928	0.0052229	0.0030975
novel_mir_328	8	0	2.66667	0	-4.02928	0.0052229	0.0030975
novel_mir_334	8	0	2.66667	0	-4.02928	0.0052229	0.0030975
novel_mir_372	8	0	2.66667	0	-4.02928	0.0052229	0.0030975
novel_mir_439	8	0	2.66667	0	-4.02928	0.0052229	0.0030975
novel_mir_469	8	0	2.66667	0	-4.02928	0.0052229	0.0030975
novel_mir_442	8	0	2.66667	0	-4.02928	0.0052229	0.0030975
novel_mir_32	0	8	0	2.66667	3.97072	0.0059166	0.00326241
novel_mir_11	0	8	0	2.66667	3.97072	0.0059166	0.00326241
novel_mir_409	0	8	0	2.66667	3.97072	0.0059166	0.00326241
novel_mir_507	0	8	0	2.66667	3.97072	0.0059166	0.00326241
novel_mir_518	0	8	0	2.66667	3.97072	0.0059166	0.00326241
novel_mir_516	0	8	0	2.66667	3.97072	0.0059166	0.00326241
novel_mir_517	0	8	0	2.66667	3.97072	0.0059166	0.00326241
novel_mir_521	0	8	0	2.66667	3.97072	0.0059166	0.00326241
novel_mir_522	0	8	0	2.66667	3.97072	0.0059166	0.00326241
novel_mir_579	0	8	0	2.66667	3.97072	0.0059166	0.00326241
novel_mir_581	0	8	0	2.66667	3.97072	0.0059166	0.00326241
novel_mir_592	0	8	0	2.66667	3.97072	0.0059166	0.00326241
novel_mir_595	0	8	0	2.66667	3.97072	0.0059166	0.00326241
novel_mir_609	0	8	0	2.66667	3.97072	0.0059166	0.00326241
novel_mir_668	0	8	0	2.66667	3.97072	0.0059166	0.00326241
novel_mir_673	0	8	0	2.66667	3.97072	0.0059166	0.00326241
novel_mir_696	0	8	0	2.66667	3.97072	0.0059166	0.00326241
novel_mir_178	7	0	2.33333	0	-3.83663	0.0101082	0.0053953
novel_mir_189	7	0	2.33333	0	-3.83663	0.0101082	0.0053953
novel_mir_268	7	0	2.33333	0	-3.83663	0.0101082	0.0053953
novel_mir_315	7	0	2.33333	0	-3.83663	0.0101082	0.0053953
novel_mir_345	7	0	2.33333	0	-3.83663	0.0101082	0.0053953
novel_mir_451	7	0	2.33333	0	-3.83663	0.0101082	0.0053953
novel_mir_446	7	0	2.33333	0	-3.83663	0.0101082	0.0053953
novel_mir_456	7	0	2.33333	0	-3.83663	0.0101082	0.0053953
novel_mir_78	0	7	0	2.33333	3.77808	0.0113139	0.0056123
novel_mir_280	0	7	0	2.33333	3.77808	0.0113139	0.0056123
novel_mir_294	0	7	0	2.33333	3.77808	0.0113139	0.0056123
novel_mir_542	0	7	0	2.33333	3.77808	0.0113139	0.0056123
novel_mir_584	0	7	0	2.33333	3.77808	0.0113139	0.0056123
novel_mir_588	0	7	0	2.33333	3.77808	0.0113139	0.0056123
novel_mir_593	0	7	0	2.33333	3.77808	0.0113139	0.0056123
novel_mir_605	0	7	0	2.33333	3.77808	0.0113139	0.0056123
novel_mir_610	0	7	0	2.33333	3.77808	0.0113139	0.0056123
novel_mir_612	0	7	0	2.33333	3.77808	0.0113139	0.0056123
novel_mir_660	0	7	0	2.33333	3.77808	0.0113139	0.0056123
novel_mir_654	0	7	0	2.33333	3.77808	0.0113139	0.0056123
novel_mir_667	0	7	0	2.33333	3.77808	0.0113139	0.0056123
novel_mir_679	0	7	0	2.33333	3.77808	0.0113139	0.0056123
novel_mir_680	0	7	0	2.33333	3.77808	0.0113139	0.0056123
novel_mir_683	0	7	0	2.33333	3.77808	0.0113139	0.0056123
novel_mir_703	0	7	0	2.33333	3.77808	0.0113139	0.0056123
novel_mir_704	0	7	0	2.33333	3.77808	0.0113139	0.0056123
novel_mir_705	0	7	0	2.33333	3.77808	0.0113139	0.0056123
novel_mir_437	12	28	4	9.33333	1.19312	0.0122885	0.00602853
novel_mir_123	26	12	8.66667	4	-1.14475	0.0183655	0.00894407
novel_mir_354	20	8	6.66667	2.66667	-1.3512	0.0185002	0.00897691
novel_mir_241	6	0	2	0	-3.61424	0.0197316	0.00901702
novel_mir_203	6	0	2	0	-3.61424	0.0197316	0.00901702
novel_mir_238	6	0	2	0	-3.61424	0.0197316	0.00901702
novel_mir_248	6	0	2	0	-3.61424	0.0197316	0.00901702
novel_mir_251	6	0	2	0	-3.61424	0.0197316	0.00901702
novel_mir_335	6	0	2	0	-3.61424	0.0197316	0.00901702
novel_mir_353	6	0	2	0	-3.61424	0.0197316	0.00901702
novel_mir_357	6	0	2	0	-3.61424	0.0197316	0.00901702
novel_mir_404	6	0	2	0	-3.61424	0.0197316	0.00901702
novel_mir_450	6	0	2	0	-3.61424	0.0197316	0.00901702
novel_mir_429	6	0	2	0	-3.61424	0.0197316	0.00901702
novel_mir_441	6	0	2	0	-3.61424	0.0197316	0.00901702
novel_mir_445	6	0	2	0	-3.61424	0.0197316	0.00901702
novel_mir_449	6	0	2	0	-3.61424	0.0197316	0.00901702
novel_mir_455	6	0	2	0	-3.61424	0.0197316	0.00901702
novel_mir_459	6	0	2	0	-3.61424	0.0197316	0.00901702
novel_mir_465	6	0	2	0	-3.61424	0.0197316	0.00901702
novel_mir_182	15	31	5	10.3333	1.01803	0.0204976	0.0093033
novel_mir_171	0	6	0	2	3.55569	0.0218111	0.00935836
novel_mir_525	0	6	0	2	3.55569	0.0218111	0.00935836
novel_mir_534	0	6	0	2	3.55569	0.0218111	0.00935836
novel_mir_535	0	6	0	2	3.55569	0.0218111	0.00935836
novel_mir_536	0	6	0	2	3.55569	0.0218111	0.00935836
novel_mir_575	0	6	0	2	3.55569	0.0218111	0.00935836
novel_mir_582	0	6	0	2	3.55569	0.0218111	0.00935836
novel_mir_583	0	6	0	2	3.55569	0.0218111	0.00935836
novel_mir_586	0	6	0	2	3.55569	0.0218111	0.00935836
novel_mir_591	0	6	0	2	3.55569	0.0218111	0.00935836
novel_mir_604	0	6	0	2	3.55569	0.0218111	0.00935836
novel_mir_606	0	6	0	2	3.55569	0.0218111	0.00935836
novel_mir_645	0	6	0	2	3.55569	0.0218111	0.00935836
novel_mir_674	0	6	0	2	3.55569	0.0218111	0.00935836
novel_mir_689	0	6	0	2	3.55569	0.0218111	0.00935836
novel_mir_692	0	6	0	2	3.55569	0.0218111	0.00935836
novel_mir_708	0	6	0	2	3.55569	0.0218111	0.00935836
novel_mir_4	18	7	6	2.33333	-1.39185	0.0222756	0.00952704
novel_mir_350	28	14	9.33333	4.66667	-1.02928	0.0247811	0.0105647
novel_mir_128	5	0	1.66667	0	-3.3512	0.0388836	0.0151367
novel_mir_190	5	0	1.66667	0	-3.3512	0.0388836	0.0151367
novel_mir_196	5	0	1.66667	0	-3.3512	0.0388836	0.0151367
novel_mir_187	5	0	1.66667	0	-3.3512	0.0388836	0.0151367
novel_mir_218	5	0	1.66667	0	-3.3512	0.0388836	0.0151367
novel_mir_229	5	0	1.66667	0	-3.3512	0.0388836	0.0151367
novel_mir_245	5	0	1.66667	0	-3.3512	0.0388836	0.0151367
novel_mir_246	5	0	1.66667	0	-3.3512	0.0388836	0.0151367
novel_mir_285	5	0	1.66667	0	-3.3512	0.0388836	0.0151367
novel_mir_332	5	0	1.66667	0	-3.3512	0.0388836	0.0151367
novel_mir_348	5	0	1.66667	0	-3.3512	0.0388836	0.0151367
novel_mir_331	5	0	1.66667	0	-3.3512	0.0388836	0.0151367
novel_mir_333	5	0	1.66667	0	-3.3512	0.0388836	0.0151367
novel_mir_379	5	0	1.66667	0	-3.3512	0.0388836	0.0151367
novel_mir_385	5	0	1.66667	0	-3.3512	0.0388836	0.0151367
novel_mir_443	5	0	1.66667	0	-3.3512	0.0388836	0.0151367
novel_mir_434	5	0	1.66667	0	-3.3512	0.0388836	0.0151367
novel_mir_444	5	0	1.66667	0	-3.3512	0.0388836	0.0151367
novel_mir_460	5	0	1.66667	0	-3.3512	0.0388836	0.0151367
novel_mir_461	5	0	1.66667	0	-3.3512	0.0388836	0.0151367
novel_mir_471	5	0	1.66667	0	-3.3512	0.0388836	0.0151367
novel_mir_54	0	5	0	1.66667	3.29265	0.0424247	0.0151367
novel_mir_69	0	5	0	1.66667	3.29265	0.0424247	0.0151367
novel_mir_483	0	5	0	1.66667	3.29265	0.0424247	0.0151367
novel_mir_515	0	5	0	1.66667	3.29265	0.0424247	0.0151367
novel_mir_520	0	5	0	1.66667	3.29265	0.0424247	0.0151367
novel_mir_523	0	5	0	1.66667	3.29265	0.0424247	0.0151367
novel_mir_526	0	5	0	1.66667	3.29265	0.0424247	0.0151367
novel_mir_530	0	5	0	1.66667	3.29265	0.0424247	0.0151367
novel_mir_531	0	5	0	1.66667	3.29265	0.0424247	0.0151367
novel_mir_533	0	5	0	1.66667	3.29265	0.0424247	0.0151367
novel_mir_541	0	5	0	1.66667	3.29265	0.0424247	0.0151367
novel_mir_573	0	5	0	1.66667	3.29265	0.0424247	0.0151367
novel_mir_554	0	5	0	1.66667	3.29265	0.0424247	0.0151367
novel_mir_577	0	5	0	1.66667	3.29265	0.0424247	0.0151367
novel_mir_580	0	5	0	1.66667	3.29265	0.0424247	0.0151367
novel_mir_594	0	5	0	1.66667	3.29265	0.0424247	0.0151367
novel_mir_598	0	5	0	1.66667	3.29265	0.0424247	0.0151367
novel_mir_599	0	5	0	1.66667	3.29265	0.0424247	0.0151367
novel_mir_603	0	5	0	1.66667	3.29265	0.0424247	0.0151367
novel_mir_615	0	5	0	1.66667	3.29265	0.0424247	0.0151367
novel_mir_617	0	5	0	1.66667	3.29265	0.0424247	0.0151367
novel_mir_639	0	5	0	1.66667	3.29265	0.0424247	0.0151367
novel_mir_670	0	5	0	1.66667	3.29265	0.0424247	0.0151367
novel_mir_671	0	5	0	1.66667	3.29265	0.0424247	0.0151367
novel_mir_675	0	5	0	1.66667	3.29265	0.0424247	0.0151367
novel_mir_677	0	5	0	1.66667	3.29265	0.0424247	0.0151367
novel_mir_684	0	5	0	1.66667	3.29265	0.0424247	0.0151367
novel_mir_685	0	5	0	1.66667	3.29265	0.0424247	0.0151367
novel_mir_686	0	5	0	1.66667	3.29265	0.0424247	0.0151367
novel_mir_690	0	5	0	1.66667	3.29265	0.0424247	0.0151367
novel_mir_691	0	5	0	1.66667	3.29265	0.0424247	0.0151367
novel_mir_694	0	5	0	1.66667	3.29265	0.0424247	0.0151367
novel_mir_699	0	5	0	1.66667	3.29265	0.0424247	0.0151367
novel_mir_700	0	5	0	1.66667	3.29265	0.0424247	0.0151367
novel_mir_701	0	5	0	1.66667	3.29265	0.0424247	0.0151367
novel_mir_706	0	5	0	1.66667	3.29265	0.0424247	0.0151367
novel_mir_112	7	16	2.33333	5.33333	1.16337	0.0635959	0.022332
novel_mir_262	7	16	2.33333	5.33333	1.16337	0.0635959	0.022332
novel_mir_213	15	7	5	2.33333	-1.12881	0.076545	0.0262961
novel_mir_344	15	7	5	2.33333	-1.12881	0.076545	0.0262961
novel_mir_454	6	14	2	4.66667	1.19312	0.0766581	0.0262961
novel_mir_52	11	5	3.66667	1.66667	-1.16678	0.119374	0.0400229
novel_mir_368	11	5	3.66667	1.66667	-1.16678	0.119374	0.0400229
novel_mir_172	12	6	4	2	-1.02928	0.141681	0.0465657

## Sheet: Table S10
Table S10.KEGG enrichment pathway of differential genes of backfat in castrated and intact pigs
#	Pathway	DEGs genes with pathway annotation (75)	All genes with pathway annotation (19266)	Pvalue	Qvalue	Pathway ID	Level 1	Level 2	Differentially expressed genes
1	MicroRNAs in cancer	9 (12%)	434 (2.25%)	4.63443e-05	0.00681261	ko05206	Human Diseases	Cancers: Overview	ENSSSCG00000006043, ENSSSCG00000006160, ENSSSCG00000007073, ENSSSCG00000009216, ENSSSCG00000025240, ENSSSCG00000031143, ENSSSCG00000031648, ENSSSCG00000032401, ENSSSCG00000033844
2	Hematopoietic cell lineage	7 (9.33%)	319 (1.66%)	0.000241869	0.00951174	ko04640	Organismal Systems	Immune system	ENSSSCG00000006043, ENSSSCG00000006379, ENSSSCG00000009216, ENSSSCG00000025644, ENSSSCG00000025795, ENSSSCG00000031648, ENSSSCG00000032401
3	Leukocyte transendothelial migration	8 (10.67%)	446 (2.31%)	0.000336522	0.00951174	ko04670	Organismal Systems	Immune system	ENSSSCG00000006043, ENSSSCG00000007073, ENSSSCG00000007718, ENSSSCG00000009216, ENSSSCG00000011747, ENSSSCG00000015559, ENSSSCG00000031648, ENSSSCG00000032401
4	Osteoclast differentiation	7 (9.33%)	341 (1.77%)	0.000362007	0.00951174	ko04380	Organismal Systems	Development	ENSSSCG00000006043, ENSSSCG00000008348, ENSSSCG00000009216, ENSSSCG00000012667, ENSSSCG00000015559, ENSSSCG00000031648, ENSSSCG00000032401
5	Small cell lung cancer	7 (9.33%)	344 (1.79%)	0.00038156	0.00951174	ko05222	Human Diseases	Cancers: Specific types	ENSSSCG00000006043, ENSSSCG00000007073, ENSSSCG00000008348, ENSSSCG00000009216, ENSSSCG00000031143, ENSSSCG00000031648, ENSSSCG00000032401
6	PI3K-Akt signaling pathway	10 (13.33%)	714 (3.71%)	0.000431888	0.00951174	ko04151	Environmental Information Processing	Signal transduction	ENSSSCG00000006043, ENSSSCG00000007073, ENSSSCG00000008348, ENSSSCG00000009216, ENSSSCG00000013263, ENSSSCG00000025240, ENSSSCG00000025795, ENSSSCG00000031143, ENSSSCG00000031648, ENSSSCG00000032401
7	Pathogenic Escherichia coli infection	7 (9.33%)	354 (1.84%)	0.00045294	0.00951174	ko05130	Human Diseases	Infectious diseases: Bacterial	ENSSSCG00000006043, ENSSSCG00000007073, ENSSSCG00000007718, ENSSSCG00000009216, ENSSSCG00000011747, ENSSSCG00000031648, ENSSSCG00000032401
8	Cell adhesion molecules (CAMs)	9 (12%)	646 (3.35%)	0.000884392	0.0162507	ko04514	Environmental Information Processing	Signaling molecules and interaction	ENSSSCG00000003575, ENSSSCG00000006043, ENSSSCG00000006379, ENSSSCG00000007073, ENSSSCG00000007718, ENSSSCG00000009216, ENSSSCG00000011747, ENSSSCG00000031648, ENSSSCG00000032401
9	Phagosome	8 (10.67%)	539 (2.8%)	0.00116047	0.0189544	ko04145	Cellular Processes	Transport and catabolism	ENSSSCG00000000647, ENSSSCG00000006043, ENSSSCG00000006979, ENSSSCG00000007073, ENSSSCG00000009216, ENSSSCG00000015559, ENSSSCG00000031648, ENSSSCG00000032401
10	p53 signaling pathway	4 (5.33%)	131 (0.68%)	0.00170885	0.0251201	ko04115	Cellular Processes	Cell growth and death	ENSSSCG00000007073, ENSSSCG00000013393, ENSSSCG00000031143, ENSSSCG00000038783
11	Pathways in cancer	10 (13.33%)	873 (4.53%)	0.00198965	0.026589	ko05200	Human Diseases	Cancers: Overview	ENSSSCG00000006043, ENSSSCG00000007073, ENSSSCG00000008348, ENSSSCG00000009216, ENSSSCG00000022351, ENSSSCG00000025795, ENSSSCG00000031143, ENSSSCG00000031648, ENSSSCG00000032401, ENSSSCG00000040288
12	Thyroid hormone signaling pathway	6 (8%)	348 (1.81%)	0.00235146	0.0288054	ko04919	Organismal Systems	Endocrine system	ENSSSCG00000006043, ENSSSCG00000006729, ENSSSCG00000008348, ENSSSCG00000009216, ENSSSCG00000031648, ENSSSCG00000032401
13	Leishmaniasis	6 (8%)	363 (1.88%)	0.00289897	0.0327807	ko05140	Human Diseases	Infectious diseases: Parasitic	ENSSSCG00000006043, ENSSSCG00000007073, ENSSSCG00000009216, ENSSSCG00000015559, ENSSSCG00000031648, ENSSSCG00000032401
14	Toxoplasmosis	6 (8%)	372 (1.93%)	0.00327041	0.0343393	ko05145	Human Diseases	Infectious diseases: Parasitic	ENSSSCG00000006043, ENSSSCG00000007073, ENSSSCG00000008348, ENSSSCG00000009216, ENSSSCG00000031648, ENSSSCG00000032401
15	Platelet activation	6 (8%)	436 (2.26%)	0.00702062	0.068802	ko04611	Organismal Systems	Immune system	ENSSSCG00000006043, ENSSSCG00000007073, ENSSSCG00000008348, ENSSSCG00000009216, ENSSSCG00000031648, ENSSSCG00000032401
16	Proteoglycans in cancer	7 (9.33%)	622 (3.23%)	0.0105396	0.0901148	ko05205	Human Diseases	Cancers: Overview	ENSSSCG00000006043, ENSSSCG00000006729, ENSSSCG00000007073, ENSSSCG00000008348, ENSSSCG00000009216, ENSSSCG00000031648, ENSSSCG00000032401
17	ECM-receptor interaction	5 (6.67%)	349 (1.81%)	0.0116338	0.0901148	ko04512	Environmental Information Processing	Signaling molecules and interaction	ENSSSCG00000006043, ENSSSCG00000007073, ENSSSCG00000009216, ENSSSCG00000031648, ENSSSCG00000032401
18	Prostate cancer	4 (5.33%)	227 (1.18%)	0.0118865	0.0901148	ko05215	Human Diseases	Cancers: Specific types	ENSSSCG00000008348, ENSSSCG00000013263, ENSSSCG00000022351, ENSSSCG00000031143
19	Complement and coagulation cascades	3 (4%)	124 (0.64%)	0.0125508	0.0901148	ko04610	Organismal Systems	Immune system	ENSSSCG00000000660, ENSSSCG00000013869, ENSSSCG00000016859
20	Shigellosis	5 (6.67%)	356 (1.85%)	0.0125906	0.0901148	ko05131	Human Diseases	Infectious diseases: Bacterial	ENSSSCG00000006043, ENSSSCG00000007073, ENSSSCG00000009216, ENSSSCG00000031648, ENSSSCG00000032401
21	Bacterial invasion of epithelial cells	5 (6.67%)	358 (1.86%)	0.0128735	0.0901148	ko05100	Human Diseases	Infectious diseases: Bacterial	ENSSSCG00000006043, ENSSSCG00000007073, ENSSSCG00000009216, ENSSSCG00000031648, ENSSSCG00000032401
22	Arrhythmogenic right ventricular cardiomyopathy (ARVC)	5 (6.67%)	372 (1.93%)	0.0149757	0.0972771	ko05412	Human Diseases	Cardiovascular diseases	ENSSSCG00000006043, ENSSSCG00000007073, ENSSSCG00000009216, ENSSSCG00000031648, ENSSSCG00000032401
23	Focal adhesion	6 (8%)	516 (2.68%)	0.0152202	0.0972771	ko04510	Cellular Processes	Cellular community	ENSSSCG00000006043, ENSSSCG00000007073, ENSSSCG00000008348, ENSSSCG00000009216, ENSSSCG00000031648, ENSSSCG00000032401
24	Pertussis	5 (6.67%)	380 (1.97%)	0.0162749	0.0996839	ko05133	Human Diseases	Infectious diseases: Bacterial	ENSSSCG00000006043, ENSSSCG00000007073, ENSSSCG00000009216, ENSSSCG00000031648, ENSSSCG00000032401
25	Regulation of actin cytoskeleton	7 (9.33%)	688 (3.57%)	0.0175014	0.102908	ko04810	Cellular Processes	Cell motility	ENSSSCG00000006043, ENSSSCG00000006729, ENSSSCG00000007073, ENSSSCG00000009216, ENSSSCG00000015353, ENSSSCG00000031648, ENSSSCG00000032401
26	Hypertrophic cardiomyopathy (HCM)	5 (6.67%)	407 (2.11%)	0.0212109	0.119923	ko05410	Human Diseases	Cardiovascular diseases	ENSSSCG00000006043, ENSSSCG00000007073, ENSSSCG00000009216, ENSSSCG00000031648, ENSSSCG00000032401
27	Lipoic acid metabolism	1 (1.33%)	8 (0.04%)	0.0307274	0.162403	ko00785	Metabolism	Metabolism of cofactors and vitamins	ENSSSCG00000026453
28	Dilated cardiomyopathy	5 (6.67%)	450 (2.34%)	0.0309339	0.162403	ko05414	Human Diseases	Cardiovascular diseases	ENSSSCG00000006043, ENSSSCG00000007073, ENSSSCG00000009216, ENSSSCG00000031648, ENSSSCG00000032401
29	Axon guidance	5 (6.67%)	458 (2.38%)	0.0330075	0.167314	ko04360	Organismal Systems	Development	ENSSSCG00000006043, ENSSSCG00000007073, ENSSSCG00000009216, ENSSSCG00000031648, ENSSSCG00000032401
30	Metabolism of xenobiotics by cytochrome P450	2 (2.67%)	76 (0.39%)	0.0354099	0.173509	ko00980	Metabolism	Xenobiotics biodegradation and metabolism	ENSSSCG00000022351, ENSSSCG00000033844
31	Lysosome	3 (4%)	188 (0.98%)	0.0370128	0.175512	ko04142	Cellular Processes	Transport and catabolism	ENSSSCG00000003575, ENSSSCG00000008769, ENSSSCG00000039798
32	Hepatitis C	3 (4%)	193 (1%)	0.0395201	0.181546	ko05160	Human Diseases	Infectious diseases: Viral	ENSSSCG00000007718, ENSSSCG00000008348, ENSSSCG00000011747
33	Phenylalanine, tyrosine and tryptophan biosynthesis	1 (1.33%)	11 (0.06%)	0.0420084	0.187128	ko00400	Metabolism	Amino acid metabolism	ENSSSCG00000000856
34	TNF signaling pathway	3 (4%)	205 (1.06%)	0.0458815	0.19716	ko04668	Environmental Information Processing	Signal transduction	ENSSSCG00000001987, ENSSSCG00000008348, ENSSSCG00000013263
35	Tight junction	4 (5.33%)	352 (1.83%)	0.048449	0.19716	ko04530	Cellular Processes	Cellular community	ENSSSCG00000007718, ENSSSCG00000008348, ENSSSCG00000011747, ENSSSCG00000038508
36	Inositol phosphate metabolism	2 (2.67%)	91 (0.47%)	0.0490273	0.19716	ko00562	Metabolism	Carbohydrate metabolism	ENSSSCG00000000591, ENSSSCG00000030345
37	Viral carcinogenesis	4 (5.33%)	356 (1.85%)	0.050124	0.19716	ko05203	Human Diseases	Cancers: Overview	ENSSSCG00000013263, ENSSSCG00000013909, ENSSSCG00000015353, ENSSSCG00000031143
38	Chemical carcinogenesis	2 (2.67%)	93 (0.48%)	0.0509665	0.19716	ko05204	Human Diseases	Cancers: Overview	ENSSSCG00000022351, ENSSSCG00000033844
39	Rap1 signaling pathway	6 (8%)	703 (3.65%)	0.0558833	0.210637	ko04015	Environmental Information Processing	Signal transduction	ENSSSCG00000006043, ENSSSCG00000007073, ENSSSCG00000008348, ENSSSCG00000009216, ENSSSCG00000031648, ENSSSCG00000032401
40	Cytokine-cytokine receptor interaction	4 (5.33%)	382 (1.98%)	0.0617831	0.224748	ko04060	Environmental Information Processing	Signaling molecules and interaction	ENSSSCG00000007501, ENSSSCG00000011322, ENSSSCG00000013909, ENSSSCG00000025795
41	Jak-STAT signaling pathway	3 (4%)	234 (1.21%)	0.0631983	0.224748	ko04630	Environmental Information Processing	Signal transduction	ENSSSCG00000008348, ENSSSCG00000013909, ENSSSCG00000025795
42	Renal cell carcinoma	2 (2.67%)	106 (0.55%)	0.0642136	0.224748	ko05211	Human Diseases	Cancers: Specific types	ENSSSCG00000008348, ENSSSCG00000040288
43	mTOR signaling pathway	2 (2.67%)	110 (0.57%)	0.0685001	0.234175	ko04150	Environmental Information Processing	Signal transduction	ENSSSCG00000008348, ENSSSCG00000025240
44	Nitrogen metabolism	1 (1.33%)	22 (0.11%)	0.0822747	0.274872	ko00910	Metabolism	Energy metabolism	ENSSSCG00000006233
45	Adrenergic signaling in cardiomyocytes	3 (4%)	279 (1.45%)	0.0951071	0.310683	ko04261	Organismal Systems	Circulatory system	ENSSSCG00000006729, ENSSSCG00000008348, ENSSSCG00000013263
46	PPAR signaling pathway	2 (2.67%)	135 (0.7%)	0.097231	0.310716	ko03320	Organismal Systems	Endocrine system	ENSSSCG00000000647, ENSSSCG00000012202
47	Cholinergic synapse	2 (2.67%)	146 (0.76%)	0.110787	0.336829	ko04725	Organismal Systems	Nervous system	ENSSSCG00000008348, ENSSSCG00000013263
48	Hepatitis B	3 (4%)	301 (1.56%)	0.112698	0.336829	ko05161	Human Diseases	Infectious diseases: Viral	ENSSSCG00000008348, ENSSSCG00000013263, ENSSSCG00000031143
49	Phenylalanine metabolism	1 (1.33%)	31 (0.16%)	0.113974	0.336829	ko00360	Metabolism	Amino acid metabolism	ENSSSCG00000000856
50	TGF-beta signaling pathway	2 (2.67%)	149 (0.77%)	0.114568	0.336829	ko04350	Environmental Information Processing	Signal transduction	ENSSSCG00000007073, ENSSSCG00000007501
51	Glucagon signaling pathway	2 (2.67%)	161 (0.84%)	0.130007	0.374727	ko04922	Organismal Systems	Endocrine system	ENSSSCG00000008348, ENSSSCG00000013263
52	cAMP signaling pathway	3 (4%)	330 (1.71%)	0.137615	0.383429	ko04024	Environmental Information Processing	Signal transduction	ENSSSCG00000006729, ENSSSCG00000008348, ENSSSCG00000013263
53	Butanoate metabolism	1 (1.33%)	39 (0.2%)	0.141242	0.383429	ko00650	Metabolism	Carbohydrate metabolism	ENSSSCG00000026453
54	Phosphatidylinositol signaling system	2 (2.67%)	170 (0.88%)	0.141888	0.383429	ko04070	Environmental Information Processing	Signal transduction	ENSSSCG00000000591, ENSSSCG00000030345
55	Protein digestion and absorption	2 (2.67%)	176 (0.91%)	0.149935	0.383429	ko04974	Organismal Systems	Digestive system	ENSSSCG00000010256, ENSSSCG00000032401
56	B cell receptor signaling pathway	2 (2.67%)	176 (0.91%)	0.149935	0.383429	ko04662	Organismal Systems	Immune system	ENSSSCG00000008348, ENSSSCG00000012667
57	Salivary secretion	2 (2.67%)	177 (0.92%)	0.151285	0.383429	ko04970	Organismal Systems	Digestive system	ENSSSCG00000000492, ENSSSCG00000006729
58	Toll-like receptor signaling pathway	2 (2.67%)	177 (0.92%)	0.151285	0.383429	ko04620	Organismal Systems	Immune system	ENSSSCG00000008348, ENSSSCG00000009216
59	Estrogen signaling pathway	2 (2.67%)	188 (0.98%)	0.166292	0.41432	ko04915	Organismal Systems	Endocrine system	ENSSSCG00000008348, ENSSSCG00000013263
60	Fc gamma R-mediated phagocytosis	2 (2.67%)	197 (1.02%)	0.178758	0.437958	ko04666	Organismal Systems	Immune system	ENSSSCG00000008348, ENSSSCG00000015353
61	Insulin resistance	2 (2.67%)	206 (1.07%)	0.191366	0.457063	ko04931	Human Diseases	Endocrine and metabolic diseases	ENSSSCG00000008348, ENSSSCG00000013263
62	AMPK signaling pathway	2 (2.67%)	207 (1.07%)	0.192775	0.457063	ko04152	Environmental Information Processing	Signal transduction	ENSSSCG00000008348, ENSSSCG00000013263
63	FoxO signaling pathway	2 (2.67%)	214 (1.11%)	0.202673	0.472035	ko04068	Environmental Information Processing	Signal transduction	ENSSSCG00000008348, ENSSSCG00000038732
64	Dopaminergic synapse	2 (2.67%)	216 (1.12%)	0.205512	0.472035	ko04728	Organismal Systems	Nervous system	ENSSSCG00000008348, ENSSSCG00000013263
65	Vasopressin-regulated water reabsorption	1 (1.33%)	61 (0.32%)	0.212034	0.472258	ko04962	Organismal Systems	Excretory system	ENSSSCG00000013263
66	Cocaine addiction	1 (1.33%)	61 (0.32%)	0.212034	0.472258	ko05030	Human Diseases	Substance dependence	ENSSSCG00000013263
67	Tryptophan metabolism	1 (1.33%)	63 (0.33%)	0.218177	0.478686	ko00380	Metabolism	Amino acid metabolism	ENSSSCG00000033844
68	Ovarian steroidogenesis	1 (1.33%)	68 (0.35%)	0.233327	0.502542	ko04913	Organismal Systems	Endocrine system	ENSSSCG00000033844
69	Signaling pathways regulating pluripotency of stem cells	2 (2.67%)	238 (1.24%)	0.236993	0.502542	ko04550	Cellular Processes	Cellular community	ENSSSCG00000008348, ENSSSCG00000013909
70	Drug metabolism - cytochrome P450	1 (1.33%)	70 (0.36%)	0.239306	0.502542	ko00982	Metabolism	Xenobiotics biodegradation and metabolism	ENSSSCG00000022351
71	Carbohydrate digestion and absorption	1 (1.33%)	72 (0.37%)	0.245238	0.506716	ko04973	Organismal Systems	Digestive system	ENSSSCG00000008348
72	Glutathione metabolism	1 (1.33%)	73 (0.38%)	0.248188	0.506716	ko00480	Metabolism	Metabolism of other amino acids	ENSSSCG00000022351
73	Epstein-Barr virus infection	3 (4%)	455 (2.36%)	0.260813	0.515017	ko05169	Human Diseases	Infectious diseases: Viral	ENSSSCG00000003575, ENSSSCG00000008348, ENSSSCG00000032401
74	Amino sugar and nucleotide sugar metabolism	1 (1.33%)	78 (0.4%)	0.262764	0.515017	ko00520	Metabolism	Carbohydrate metabolism	ENSSSCG00000006793
75	Steroid hormone biosynthesis	1 (1.33%)	78 (0.4%)	0.262764	0.515017	ko00140	Metabolism	Lipid metabolism	ENSSSCG00000033844
76	Regulation of lipolysis in adipocytes	1 (1.33%)	80 (0.42%)	0.268516	0.519366	ko04923	Organismal Systems	Endocrine system	ENSSSCG00000008348
77	Endometrial cancer	1 (1.33%)	91 (0.47%)	0.29937	0.557631	ko05213	Human Diseases	Cancers: Specific types	ENSSSCG00000008348
78	Chemokine signaling pathway	2 (2.67%)	282 (1.46%)	0.30048	0.557631	ko04062	Organismal Systems	Immune system	ENSSSCG00000008348, ENSSSCG00000011322
79	Starch and sucrose metabolism	1 (1.33%)	92 (0.48%)	0.302111	0.557631	ko00500	Metabolism	Carbohydrate metabolism	ENSSSCG00000028204
80	Glycerolipid metabolism	1 (1.33%)	93 (0.48%)	0.30484	0.557631	ko00561	Metabolism	Lipid metabolism	ENSSSCG00000012202
81	Acute myeloid leukemia	1 (1.33%)	96 (0.5%)	0.312967	0.557631	ko05221	Human Diseases	Cancers: Specific types	ENSSSCG00000008348
82	Retinol metabolism	1 (1.33%)	96 (0.5%)	0.312967	0.557631	ko00830	Metabolism	Metabolism of cofactors and vitamins	ENSSSCG00000006245
83	cGMP-PKG signaling pathway	2 (2.67%)	292 (1.52%)	0.314853	0.557631	ko04022	Environmental Information Processing	Signal transduction	ENSSSCG00000008348, ENSSSCG00000013263
84	Measles	2 (2.67%)	296 (1.54%)	0.320586	0.561026	ko05162	Human Diseases	Infectious diseases: Viral	ENSSSCG00000008348, ENSSSCG00000031143
85	Insulin signaling pathway	2 (2.67%)	299 (1.55%)	0.324879	0.56185	ko04910	Organismal Systems	Endocrine system	ENSSSCG00000008348, ENSSSCG00000030345
86	Amoebiasis	2 (2.67%)	304 (1.58%)	0.33202	0.562589	ko05146	Human Diseases	Infectious diseases: Parasitic	ENSSSCG00000025644, ENSSSCG00000032401
87	Thyroid hormone synthesis	1 (1.33%)	104 (0.54%)	0.334182	0.562589	ko04918	Organismal Systems	Endocrine system	ENSSSCG00000013263
88	Mineral absorption	1 (1.33%)	105 (0.55%)	0.336788	0.562589	ko04978	Organismal Systems	Digestive system	ENSSSCG00000039798
89	VEGF signaling pathway	1 (1.33%)	109 (0.57%)	0.347112	0.567859	ko04370	Environmental Information Processing	Signal transduction	ENSSSCG00000008348
90	Biosynthesis of amino acids	1 (1.33%)	113 (0.59%)	0.357277	0.567859	ko01230	Metabolism	Global and overview maps	ENSSSCG00000000856
91	Adipocytokine signaling pathway	1 (1.33%)	114 (0.59%)	0.359794	0.567859	ko04920	Organismal Systems	Endocrine system	ENSSSCG00000008348
92	Insulin secretion	1 (1.33%)	117 (0.61%)	0.367286	0.567859	ko04911	Organismal Systems	Endocrine system	ENSSSCG00000013263
93	Prion diseases	1 (1.33%)	118 (0.61%)	0.369764	0.567859	ko05020	Human Diseases	Neurodegenerative diseases	ENSSSCG00000016859
94	Non-small cell lung cancer	1 (1.33%)	119 (0.62%)	0.372233	0.567859	ko05223	Human Diseases	Cancers: Specific types	ENSSSCG00000008348
95	Cytosolic DNA-sensing pathway	1 (1.33%)	119 (0.62%)	0.372233	0.567859	ko04623	Organismal Systems	Immune system	ENSSSCG00000001987
96	Hippo signaling pathway	2 (2.67%)	334 (1.73%)	0.374378	0.567859	ko04390	Environmental Information Processing	Signal transduction	ENSSSCG00000007501, ENSSSCG00000031648
97	Bile secretion	1 (1.33%)	123 (0.64%)	0.382012	0.567859	ko04976	Organismal Systems	Digestive system	ENSSSCG00000006729
98	Prolactin signaling pathway	1 (1.33%)	124 (0.64%)	0.384433	0.567859	ko04917	Organismal Systems	Endocrine system	ENSSSCG00000008348
99	Progesterone-mediated oocyte maturation	1 (1.33%)	126 (0.65%)	0.389247	0.567859	ko04914	Organismal Systems	Endocrine system	ENSSSCG00000008348
100	Amphetamine addiction	1 (1.33%)	126 (0.65%)	0.389247	0.567859	ko05031	Human Diseases	Substance dependence	ENSSSCG00000013263
101	Bladder cancer	1 (1.33%)	127 (0.66%)	0.391641	0.567859	ko05219	Human Diseases	Cancers: Specific types	ENSSSCG00000007073
102	Apoptosis	1 (1.33%)	128 (0.66%)	0.394024	0.567859	ko04210	Cellular Processes	Cell growth and death	ENSSSCG00000008348
103	Colorectal cancer	1 (1.33%)	131 (0.68%)	0.401121	0.572474	ko05210	Human Diseases	Cancers: Specific types	ENSSSCG00000008348
104	Transcriptional misregulation in cancer	2 (2.67%)	366 (1.9%)	0.418363	0.587091	ko05202	Human Diseases	Cancers: Overview	ENSSSCG00000038783, ENSSSCG00000040288
105	Pancreatic secretion	1 (1.33%)	141 (0.73%)	0.42419	0.587091	ko04972	Organismal Systems	Digestive system	ENSSSCG00000006729
106	Aldosterone synthesis and secretion	1 (1.33%)	141 (0.73%)	0.42419	0.587091	ko04925	Organismal Systems	Endocrine system	ENSSSCG00000013263
107	ErbB signaling pathway	1 (1.33%)	143 (0.74%)	0.428697	0.587091	ko04012	Environmental Information Processing	Signal transduction	ENSSSCG00000008348
108	Central carbon metabolism in cancer	1 (1.33%)	146 (0.76%)	0.435393	0.587091	ko05230	Human Diseases	Cancers: Overview	ENSSSCG00000008348
109	Fc epsilon RI signaling pathway	1 (1.33%)	148 (0.77%)	0.439814	0.587091	ko04664	Organismal Systems	Immune system	ENSSSCG00000008348
110	Gastric acid secretion	1 (1.33%)	151 (0.78%)	0.446382	0.587091	ko04971	Organismal Systems	Digestive system	ENSSSCG00000006729
111	Hippo signaling pathway - fly	1 (1.33%)	153 (0.79%)	0.450717	0.587091	ko04391	Environmental Information Processing	Signal transduction	ENSSSCG00000031143
112	Melanoma	1 (1.33%)	153 (0.79%)	0.450717	0.587091	ko05218	Human Diseases	Cancers: Specific types	ENSSSCG00000008348
113	Metabolic pathways	8 (10.67%)	1891 (9.82%)	0.457757	0.587091	ko01100	Metabolism	Global and overview maps	ENSSSCG00000000591, ENSSSCG00000000856, ENSSSCG00000006793, ENSSSCG00000012202, ENSSSCG00000026453, ENSSSCG00000028204, ENSSSCG00000030345, ENSSSCG00000035218
114	Pancreatic cancer	1 (1.33%)	157 (0.81%)	0.459289	0.587091	ko05212	Human Diseases	Cancers: Specific types	ENSSSCG00000008348
115	Cardiac muscle contraction	1 (1.33%)	157 (0.81%)	0.459289	0.587091	ko04260	Organismal Systems	Circulatory system	ENSSSCG00000006729
116	Choline metabolism in cancer	1 (1.33%)	164 (0.85%)	0.473973	0.593121	ko05231	Human Diseases	Cancers: Overview	ENSSSCG00000008348
117	Melanogenesis	1 (1.33%)	165 (0.86%)	0.476038	0.593121	ko04916	Organismal Systems	Endocrine system	ENSSSCG00000013263
118	MAPK signaling pathway	2 (2.67%)	413 (2.14%)	0.480064	0.593121	ko04010	Environmental Information Processing	Signal transduction	ENSSSCG00000006160, ENSSSCG00000008348
119	mRNA surveillance pathway	1 (1.33%)	167 (0.87%)	0.480145	0.593121	ko03015	Genetic Information Processing	Translation	ENSSSCG00000006729
120	HIF-1 signaling pathway	1 (1.33%)	177 (0.92%)	0.500207	0.612754	ko04066	Environmental Information Processing	Signal transduction	ENSSSCG00000008348
121	Sphingolipid signaling pathway	1 (1.33%)	183 (0.95%)	0.511876	0.621382	ko04071	Environmental Information Processing	Signal transduction	ENSSSCG00000008348
122	Glioma	1 (1.33%)	185 (0.96%)	0.515705	0.621382	ko05214	Human Diseases	Cancers: Specific types	ENSSSCG00000008348
123	Chronic myeloid leukemia	1 (1.33%)	195 (1.01%)	0.534412	0.638687	ko05220	Human Diseases	Cancers: Specific types	ENSSSCG00000008348
124	Cell cycle	1 (1.33%)	203 (1.05%)	0.548862	0.650668	ko04110	Cellular Processes	Cell growth and death	ENSSSCG00000031143
125	Oocyte meiosis	1 (1.33%)	206 (1.07%)	0.554167	0.6517	ko04114	Cellular Processes	Cell growth and death	ENSSSCG00000031143
126	Chagas disease (American trypanosomiasis)	1 (1.33%)	218 (1.13%)	0.574775	0.67057	ko05142	Human Diseases	Infectious diseases: Parasitic	ENSSSCG00000008348
127	Serotonergic synapse	1 (1.33%)	227 (1.18%)	0.589611	0.682463	ko04726	Organismal Systems	Nervous system	ENSSSCG00000032401
128	Malaria	1 (1.33%)	240 (1.25%)	0.610144	0.689648	ko05144	Human Diseases	Infectious diseases: Parasitic	ENSSSCG00000007073
129	Endocytosis	2 (2.67%)	526 (2.73%)	0.611101	0.689648	ko04144	Cellular Processes	Transport and catabolism	ENSSSCG00000008348, ENSSSCG00000038732
130	T cell receptor signaling pathway	1 (1.33%)	241 (1.25%)	0.611681	0.689648	ko04660	Organismal Systems	Immune system	ENSSSCG00000008348
131	Systemic lupus erythematosus	1 (1.33%)	243 (1.26%)	0.614737	0.689648	ko05322	Human Diseases	Immune diseases	ENSSSCG00000016859
132	Parkinson's disease	1 (1.33%)	246 (1.28%)	0.619276	0.689648	ko05012	Human Diseases	Neurodegenerative diseases	ENSSSCG00000022945
133	Purine metabolism	1 (1.33%)	260 (1.35%)	0.63977	0.699984	ko00230	Metabolism	Nucleotide metabolism	ENSSSCG00000035218
134	Neurotrophin signaling pathway	1 (1.33%)	265 (1.38%)	0.646823	0.699984	ko04722	Organismal Systems	Nervous system	ENSSSCG00000008348
135	Alcoholism	1 (1.33%)	266 (1.38%)	0.648217	0.699984	ko05034	Human Diseases	Substance dependence	ENSSSCG00000013263
136	Adherens junction	1 (1.33%)	268 (1.39%)	0.650988	0.699984	ko04520	Cellular Processes	Cellular community	ENSSSCG00000008348
137	Non-alcoholic fatty liver disease (NAFLD)	1 (1.33%)	269 (1.4%)	0.652366	0.699984	ko04932	Human Diseases	Endocrine and metabolic diseases	ENSSSCG00000008348
138	Phospholipase D signaling pathway	1 (1.33%)	278 (1.44%)	0.664528	0.707866	ko04072	Environmental Information Processing	Signal transduction	ENSSSCG00000008348
139	Natural killer cell mediated cytotoxicity	1 (1.33%)	284 (1.47%)	0.672401	0.7111	ko04650	Organismal Systems	Immune system	ENSSSCG00000006379
140	Influenza A	1 (1.33%)	307 (1.59%)	0.700929	0.735975	ko05164	Human Diseases	Infectious diseases: Viral	ENSSSCG00000008348
141	Huntington's disease	1 (1.33%)	328 (1.7%)	0.724827	0.755671	ko05016	Human Diseases	Neurodegenerative diseases	ENSSSCG00000013263
142	Calcium signaling pathway	1 (1.33%)	349 (1.81%)	0.746839	0.773137	ko04020	Environmental Information Processing	Signal transduction	ENSSSCG00000010101
143	Neuroactive ligand-receptor interaction	1 (1.33%)	369 (1.92%)	0.766185	0.787616	ko04080	Environmental Information Processing	Signaling molecules and interaction	ENSSSCG00000010101
144	Alzheimer's disease	1 (1.33%)	387 (2.01%)	0.782343	0.798642	ko05010	Human Diseases	Neurodegenerative diseases	ENSSSCG00000032401
145	Tuberculosis	1 (1.33%)	445 (2.31%)	0.827276	0.838687	ko05152	Human Diseases	Infectious diseases: Bacterial	ENSSSCG00000008348
146	Ras signaling pathway	1 (1.33%)	469 (2.43%)	0.843069	0.848843	ko04014	Environmental Information Processing	Signal transduction	ENSSSCG00000008348
147	HTLV-I infection	1 (1.33%)	518 (2.69%)	0.87102	0.87102	ko05166	Human Diseases	Infectious diseases: Viral	ENSSSCG00000008348

[truncated: 3 more sheets: Table S11, Table S12, Table S13]
